# Supplementary material for: Visualizing the metazoan proliferation-quiescence decision in vivo
Source: eLife. 2020 Dec 22;9:e63265. doi: 10.7554/eLife.63265 (PMC7880687; doi:10.7554/eLife.63265)
Supplement: Figure 1—source data 1. — Raw data of DHB ratios used to generate Figure 1G, H and J in Microsoft Excel format. [file elife-63265-fig1-data1.xlsx]

## Sheet: Figure 1
Figure 1
	G					H
	G2		G1			Time (min)	DQM298
	DQM298	DQM543	DQM298	DQM543		-120	0.407322		0.383071		0.370758		0.263359		0.236912		0.516358		0.38954	0.368281	0.613633	0.810453	0.38678	0.456562	0.254058	0.596554
	1.43389	4.54335	0.485303	0.659844		-110	0.34474		0.486854		0.384202		0.278843		0.317716		0.540194		0.368973	0.34649	0.538719	0.864916	0.419455	0.486679	0.289551	0.560453
	1.71974	3.63643	0.469634	0.863593		-105	0.399049		0.475442		0.358159		0.328723		0.354458		0.442209		0.40045	0.384958	0.608342	0.872883	0.346017	0.425591	0.330525	0.590999
	1.11109	4.67498	0.469913	0.604784		-100	0.421053		0.446218		0.34969		0.340404		0.267615		0.322621		0.368229	0.369565	0.561191	0.812421	0.380536	0.449724	0.292996	0.567069
	1.27506	2.89321	0.337819	0.659563		-95	0.609687		0.450909		0.399694		0.355438		0.598483		0.400774		0.495613	0.453177	0.719342	0.904538	0.338647	0.320253	0.552652	0.692011
	1.16326	3.54032	0.209103	1.04828		-90	0.437085		0.50956		0.324894		0.425216		0.268923		0.515623		0.412981	0.375088	0.73019	0.659858	0.428293	0.551916	0.464547	0.701214
	1.52174	3.78019	0.265938	0.891627		-85	0.494537		0.453175		0.356395		0.294779		0.364658		0.866564		0.494956	0.336118	0.664715	0.726381	0.434738	0.548238	0.556195	0.476858
	1.72508	3.06509	0.311453	1.13871		-80	0.432394		0.54441		0.37502		0.199463		0.293489		0.508978		0.334544	0.517554	0.670726	0.818263	0.635724	0.636134	0.427589	0.858883
	1.41073	4.00148	0.536601	1.16999		-75	0.544099		0.6122		0.436381		0.367397		0.683341		0.616101		0.356646	0.380875	0.701036	0.911969	0.735151	0.343224	0.345215	0.900201
	1.15969	4.33776	0.414754	1.07434		-70	0.737893		0.745398		0.454002		0.539572		0.543857		0.863254		0.486067	0.469206	0.586535	0.782742	0.603738	0.49129	0.375277	0.670733
	1.25755	4.15974	0.47591	0.720856		-65	0.795406		0.81587		0.493938		0.681245		0.512071		0.625393		0.670805	0.471967	0.608625	0.855529	0.478411	0.570113	0.409589	0.666227
	1.38129	4.01945	0.403353	0.867517		-60	0.744229		0.653487		0.7478		0.611345		0.741855		0.514198		0.539617	0.508161	0.607918	0.907875	0.477372	0.480868	0.303645	0.590254
	1.13576	3.06079	0.554807	0.41344		-55	0.816588		0.590729		0.669346		0.603194		0.525211		0.425405		0.76691	0.534085	0.650267	0.975334	0.649495	0.60314	0.363888	1.05847
	0.880718	3.06321	0.740834	0.24784		-50	0.861806		0.570454		0.6592		0.609969		0.412813		0.632745		0.480103	0.525423	0.810808	0.901031	0.508692	0.585784	0.467713	0.686236
	1.56302	4.25617	0.294612	0.190948		-45	0.765292		0.633721		0.668393		0.582942		0.618092		0.58069		0.78086	0.696875	0.70038	0.798559	0.723184	0.585029	0.398456	0.852958
	1.70952	4.30444	0.402411	0.573839		-40	0.65237		0.696925		0.631965		0.566951		0.597795		0.901419		0.594459	0.747864	0.666585	1.09156	0.642001	0.461929	0.564385	0.898985
	1.09416		0.528244	0.495583		-35	0.792776		0.595791		0.733179		0.663392		0.708444		0.883078		0.779953	0.628201	0.739778	1.08008	0.726946	0.369888	0.584875	0.963656
	1.15996		0.479283	0.229422		-30	0.815428		0.62204		0.516433		1.0389		0.809278		0.917766		0.732359	0.791238		0.857594	0.611986	0.565808	0.552684	0.789116
	1.72393		0.528062	0.184295		-25	0.857878		0.689147		0.846527		1.1451		0.685507		0.926254		0.591036	0.388989		1.1507	0.624675	0.805632	0.771233	0.745099
	1.03798		0.546826	0.324915		-20	0.968648		0.846002		1.03798		1.10342		0.72204		0.888873		0.926084			0.897052	0.704101	0.676554	0.584581	0.86416	0.863459												1.32431		1.77532
	1.1451		0.540462	0.232248		-15	0.905347		0.453742		0.367245		0.860673		0.541265		0.64368					1.18495	1.09752	0.643558	0.712233	1.07163	1.47504		1.83648			1.01296		1.27204					1.51		1.81477				0.866755			1.35399
	0.861806		0.459619	0.417568		-10	0.601235		0.192987		0.44625		0.51215		0.398252		0.452036					1.05535	0.469729	0.680603	0.360824		2.12461		1.39884			0.681307		0.621023		0.532878		0.991769	1.46454		2.28945				0.820378			0.828522
	0.846002		0.310873	0.826839		-5	0.760803		0.680212		0.543282		1.16945		0.612166		0.71594										1.02705		0.703104			0.533292		0.812442		0.924243		0.822335	0.774758		0.845707	0.716315			0.594578			0.843202
	1.03798		0.449803	0.870027		0	0.985347	0.82776	1.03008	0.912128	1.32937	1.14876	0.982829	1.17164	0.767802	0.641618	1.07534	0.614249									1.05769	0.955482	0.848053	1.16422	0.755033	0.961205	1.01439	1.35944	0.979591	0.864534	0.579445	0.806388	0.947791	0.87764	0.711574	0.724371		0.798142	1.03214	0.710086	1.2862	1.16416	1.0946
	1.1451		0.41218	0.574057		5	0.88882	0.760947	0.766388	0.665685	0.583398	0.569558	0.49763	0.430089	0.592561	0.501685	0.881249	0.460597									0.362749	0.492641	0.606088	0.703149	0.43891	0.589251	0.634817	0.728554	0.658154	0.550806	0.545895	0.56437	0.574338	0.968676	0.593477	0.702982	0.683859	0.361919	0.39215	0.557718	0.52562	0.593352	0.645554
	0.809278		0.443627	0.120572		10	0.373038	0.750796	0.569579	0.654027	0.541334	0.226964	0.476756	0.652103	0.405677	0.268031	0.53592	0.457904									0.228259	0.46272	0.38023	0.368198	0.29879	0.343567	0.295187	0.456114	0.470536	0.62074	0.510913	0.552389	0.438431	0.37985	0.352664	0.447189	0.5611	0.220453	0.251123	0.190226	0.231208	0.607212	0.63409
	0.917766		0.243246	0.501871		15	0.427337	0.552064	0.43635	0.439932	0.293881	0.272926	0.424075	0.236405	0.202676	0.177434	0.361805	0.175364									0.33999	0.345229	0.235616	0.236178	0.315884	0.301391	0.276766	0.49946	0.381066	0.54085	0.407387	0.543012	0.426008	0.450404	0.235638	0.193548	0.200169	0.151055	0.1489	0.200154	0.18694	0.518012	0.449348
	1.09752		0.227258	0.229449		20	0.208813	0.367303	0.294454	0.382169	0.159605	0.153812	0.275471	0.22965	0.173532	0.235984	0.193098	0.215271									0.333686	0.313576	0.195295	0.218918	0.219036	0.231185	0.212968	0.397801	0.36829	0.620055	0.484791	0.567104	0.450349	0.357277	0.223272	0.155209	0.28286	0.168294	0.134519	0.152275	0.144418	0.552432	0.595441
	0.805632		0.29959	0.203318		25	0.21022	0.351705	0.0895465	0.434385	0.187365	0.112149	0.22565	0.190517	0.171172	0.201051	0.230585	0.138971									0.162943	0.284987	0.125041	0.275689	0.237864	0.47683	0.321184	0.38033	0.497949	0.615495	0.417649	0.542046	0.352063	0.423344	0.251241	0.19458	0.337218	0.16317	0.189939	0.215581	0.150623	0.51802	0.526379
	2.12461		0.426888	0.408265		30	0.220035	0.306794	0.237478	0.296192	0.21972	0.242071	0.213748	0.130223	0.167476	0.222779	0.154429	0.154861									0.378287	0.351751	0.155655	0.205217	0.29968	0.520272	0.320163	0.558701	0.575462	0.549768	0.432523	0.606995	0.433466	0.414564	0.185495	0.422945	0.302893	0.142396	0.188765	0.28547	0.167995	0.544545	0.52226
	1.83648		0.38888			35	0.215453	0.297443	0.250781	0.309537	0.209415	0.116216	0.225503	0.226656	0.132063	0.211748	0.122514	0.165321									0.201515	0.355569	0.152607	0.267258	0.268008	0.475438	0.412544	0.568636	0.492068	0.655727	0.611171	0.427867	0.466341	0.489254	0.125145	0.368388	0.46771	0.285907	0.249458	0.423045	0.144596	0.529816	0.531137
	1.51		0.381345			40	0.212612	0.331348			0.144594	0.188088	0.210692	0.136793	0.128874	0.169671	0.223175	0.1694									0.253535	0.242025	0.13302	0.298846	0.411829	0.403737	0.310319	0.559096	0.507659	0.542282	0.480854	0.458086	0.476118	0.472745	0.19681	0.438092	0.386462	0.3346	0.324734	0.450515	0.158412	0.596193	0.471403
	2.28945		0.643534			45					0.109272	0.163966	0.155513	0.135905	0.16274	0.234633	0.154943	0.146104									0.239654	0.318539	0.160248	0.317584	0.41093	0.52551	0.485862	0.603105	0.40267	0.548231	0.625255	0.607277	0.418059	0.448713	0.2808	0.43602	0.318011	0.595589	0.424943	0.406557	0.155918	0.562337	0.536733
	0.84676		0.408124			50					0.150834	0.14229	0.289978	0.207022	0.145335	0.235707	0.223872	0.142694									0.401833	0.335734	0.196564	0.388532	0.428901	0.598341	0.469528	0.641562	0.433375	0.555087	0.820709	0.568868	0.482385	0.337688	0.263885	0.488133	0.392118	0.422246	0.352054	0.392715	0.266818	0.696931	0.49897
	1.00686		0.187365			55					0.145035	0.18143	0.432659	0.123264	0.222418	0.259677	0.13754	0.143113									0.451584	0.390895	0.241479	0.4271	0.375494	0.552991	0.473244	0.522305	0.446541	0.471477	0.7602	0.638562	0.479235	0.446413	0.321068	0.421833	0.368493	0.612055	0.392271	0.544587	0.21881	0.60807	0.521281
	1.41197		0.112149			60					0.155452	0.24478	0.267556	0.252738													0.398593	0.367251	0.341148	0.46651	0.525719	0.748843	0.756768	0.877255	0.413656	0.416701	0.764033	0.600985	0.504451	0.560305	0.27711	0.358627	0.321288	0.507637	0.34945	0.415423	0.228091	0.606238	0.440873
	1.64305		0.22565			65					0.247284	0.334118	0.393306	0.184571													0.355588	0.273685	0.342246	0.402185	0.41043	0.590957	0.487114	0.608949	0.577288	0.494382	0.692472	0.616754	0.586351	0.669722	0.310691	0.521465	0.334181	0.537647	0.35172	0.388094	0.274683	0.536326	0.46219
	1.77259		0.190517			70					0.17164	0.229902	0.204142	0.150461													0.455217	0.344283	0.457792	0.410253	0.450677	0.60328	0.543431	0.532712	0.412913	0.404069	0.549264	0.541844	0.561891	0.632896	0.349826	0.522087	0.35124	0.345041	0.340563	0.48362	0.293839	0.500679	0.528422
	1.39786		0.21022			75					0.184131	0.347545	0.22278	0.16078													0.519587	0.302464	0.492501	0.379169	0.399753	0.532554	0.480348	0.52048	0.634824	0.512439	0.562199	0.554172	0.540512	0.637397	0.433285	0.447644	0.462227	0.448531	0.519824	0.374258	0.367262	0.57313	0.518716
	1.10412		0.351705			80					0.180154	0.368443	0.322096	0.154511													0.392769	0.637603	0.392229	0.483183	0.398921	0.64744	0.580861	0.650344	0.549154	0.614064	0.53874	0.513475	0.555922	0.75711	0.311761	0.516125	0.419074	0.399211	0.446966	0.394091	0.356205	0.448498	0.464579
	1.05424		0.0895466			85					0.333876	0.310385	0.160966	0.288485													0.379684	0.741764	0.349586	0.369897	0.363636	0.573274	0.470054	0.617647	0.526058	0.610028	0.766494	0.583355		0.698002		0.598295	0.559006	0.4464	0.477499	0.348992	0.471604	0.472111	0.42539
	1.20929		0.434385			90					0.275997	0.178123	0.380192	0.158635													0.797524	0.917198	0.2656	0.366677	0.457387	0.604844	0.46014	0.583872	0.64848	0.563385	0.857417	0.552371				0.72432	0.551858		0.661798	0.364095	0.562396	0.416545	0.420061
	1.75988		0.187365			95					0.237663	0.43589	0.205844	0.180305													0.675701	1.00278	0.289361	0.351358	0.414254	0.600092	0.563949	0.620142	0.646369	0.531167	0.842113	0.655728							0.433095	0.341953	0.529015	0.549655	0.370965
	1.28494		0.112149			100
	1.13371		0.22565
	1.57911		0.190517			J
	1.33261		0.171172			DQM662 (2xmK2, PCN-1::GFP)
	1.29125		0.201051			G1	S
	1.25337		0.230585			0.245629	0.95837
	1.17648		0.138971			0.209764	1.14002
	2.1226		0.162943			0.474421	1.42954
	1.84462		0.284987			0.371192	1.19038
	2.19348		0.125041			0.335797	0.906042
	0.782331		0.275689			0.190301	0.849966
	1.50008		0.237864			0.233742	1.17344
	1.53336		0.47683			0.206411	1.06274
	1.78131		0.321184			0.294076	0.823678
	1.2095		0.38033			0.410412	0.655392
	1.52564		0.497949			0.263117
	1.33204		0.615495			0.195513
	1.28882		0.417649
	0.782331		0.542046
	1.50008		0.352063
	1.87611		0.423344
	1.23315		0.251241
	1.46382		0.19458
	1.63146		0.337218
	1.05791		0.16317
	1.93072		0.189939
	1.70924		0.215581
	1.67487		0.164281
	1.86266		0.150623
	1.67301		0.51802
	1.77577		0.526379
	1.43639		0.113939
	1.2975		0.126815
	1.67301		0.286995
	1.27538		0.318279
			0.345618
			0.34737
			0.233958
			0.45127
			0.462197
			0.271401
			0.456817
			0.4816
			0.48577
			0.5001
			0.317319
			0.266431
			0.198627
			0.540353
			0.51078
			0.293814
			0.459698
[truncated: 22 more columns]
