# Supplementary material for: Visualizing the metazoan proliferation-quiescence decision in vivo
Source: eLife. 2020 Dec 22;9:e63265. doi: 10.7554/eLife.63265 (PMC7880687; doi:10.7554/eLife.63265)
Supplement: Figure 1—source data 2. — Raw data of DHB ratios used to generate Figure 1—figure supplement 1G, H and J in Microsoft Excel format. [file elife-63265-fig1-data2.xlsx]

## Sheet: Figure 1 - Figure supplement 1
Figure 1 - Figure Supplement 1
	F															H/N/O
	Sex Myoblasts					Uterine					VPCs					Uterine
	G2		G1			G2		G1			G2		G1			Time (min)	DQM298
	DQM298	DQM543	DQM298	DQM543		DQM298	DQM543	DQM298	DQM543		DQM298	DQM543	DQM298	DQM543		-45			1.077		0.885664		1.1114								0.957607								1.05092
	1.46929	2.72107	0.701337	0.633343		1.4112	2.71228	0.582893	1.33664		1.43389	4.54335	0.485303	0.659844		-40	0.794585		1.19332		1.06414		1.11361						0.793		0.971114								1.30941
	1.18962	2.47164	0.733148	0.805403		1.53283	4.24021	0.655409	1.06536		1.71974	3.63643	0.469634	0.863593		-35	0.753926		1.43629		1.08291		1.26354						0.906		0.975013								1.24971
	1.44088	3.10053	0.580162	0.729239		1.39459	3.45176	0.554769	1.09611		1.11109	4.67498	0.469913	0.604784		-30	0.856567		1.24504		1.01864		1.06339						0.986		1.11392								1.35194
	1.47654	3.28982	0.722911	0.780811		1.55284	3.34864	0.724265	1.03424		1.27506	2.89321	0.337819	0.659563		-25	1.08202		1.53283		1.12749		1.17498						1.221		1.09537								1.32125			1.14733				1.4048		0.868584
	1.16622	2.74919	0.628478	1.19125		1.02596	3.55004	0.546915	1.25601		1.16326	3.54032	0.209103	1.04828		-20	1.4112		1.29694		1.28576		1.55284		0.919817		0.86934		1.259		1.21413		1.28027						1.04583			1.35103		1.69033		1.12256		0.895436
	1.56502	2.738	0.561384	1.04895		1.25864	3.02709	0.574738	1.30598		1.52174	3.78019	0.265938	0.891627		-15	1.27601		1.37646		1.39459		1.38843		0.804488		1.02596		0.589		1.3268		1.34879				1.13047		0.756329			1.42695		0.681784		1.21208		0.853117
	1.90907	2.86767	0.534537	0.952355		1.3268	4.18043	0.619323	1.26441		1.72508	3.06509	0.311453	1.13871		-10	1.2948		0.733064		0.840461		0.767408		0.46625		1.06573		0.574		0.941536		0.763835		1.33468		0.744575		0.965759			1.11794		0.97368		0.933931		1.02598
	1.17602	3.43609	0.469476	0.957074		1.34879	3.3806	0.800275	1.41692		1.41073	4.00148	0.536601	1.16999		-5	0.477786		0.671526		0.959583		0.954898		0.685604		0.554451		0.685		0.749809		0.983106		0.723664		0.808417		0.986171			0.79619		0.181942		0.891282		0.623633
	1.45497	3.53354	0.430716	1.0138		1.35194	2.77796	0.675103	0.972538		1.15969	4.33776	0.414754	1.07434		0	0.950881	1.03008	0.754597	0.978746	0.802326	0.74398	0.703099	0.933639	0.747053	0.549821	0.764139	0.666727	0.774	1.03601	0.949223	0.88596	1.13614	1.08394	1.06968	1.26601	0.868905	0.902333	0.792659	0.999715		1.19873	0.797652	1.02331	0.894972	0.743695	0.907645	0.674814	0.984668
	1.497	3.58291	0.450044	1.16857		1.42695	2.09506	0.463518	1.09691		1.25755	4.15974	0.47591	0.720856		5	0.640626	0.96199	0.547381	0.687396	0.710251	0.751398	0.683228	0.74499	0.737949	0.544271	0.82266	0.817382	0.79	0.672983	0.859192	0.720684	0.861234	0.837261	0.826375	0.950264	0.756003	0.733795	0.699606	0.920789	0.692653	0.805093	0.824026	0.947947	0.766562	0.786399	0.878978	0.904521	0.785058
	1.28848		0.656317	1.18155		1.69033	2.76288	0.755937	1.03397		1.38129	4.01945	0.403353	0.867517		10	0.590598	0.594879	0.579029	0.546994	0.512475	0.662528	0.420917	0.681758	0.710123	0.523022	0.798095	0.759199	0.723	0.65717	0.627733	0.665442	0.770514	0.696024	0.628563	0.795886	0.764319	0.681474	0.691623	0.739143	0.646952	0.744791	0.661764	0.902835	0.748137	0.867597	0.892553	0.700326	0.627971
	1.31205		0.556747	1.201		1.4048		0.544603	1.23414		1.13576	3.06079	0.554807	0.41344		15	0.560785	0.674507	0.600947	0.551548	0.61912	0.555855	0.585567	0.76863	0.606266	0.495554	0.7776	0.749662	0.81	0.681173	0.606695	0.643918	0.794167	0.681159	0.605974	0.610241	0.878394	0.729646	0.667834	0.781959	0.649295	0.783224	0.712169	0.840102	0.782797	0.708783	0.797554	0.721144	0.755743
	1.39333		0.523021					0.691593	1.11456		0.880718	3.06321	0.740834	0.24784		20	0.504444	0.681869	0.598471	0.602385	0.590408	0.542044	0.668878	0.660771	0.671372	0.518463	0.699296	0.495602	0.751	0.816487	0.660775	0.638412	0.755674	0.673417	0.871103	0.632254	0.677837	0.696832	0.64973	0.900167	0.746477	0.822617	0.741104	0.746467	0.761108	0.86484	0.689305	0.662608	0.723706
	1.75041		0.648801					0.639075	1.15521		1.56302	4.25617	0.294612	0.190948		25	0.582893	0.655409	0.554769	0.724265	0.546915	0.574738	0.619323	0.800275	0.675103	0.463518	0.755937	0.544603	0.692	0.639075	0.528332	0.59902	0.794015	0.60946	0.800085	0.59929	0.765584	0.662653	0.666119	0.81125	0.596812	0.821172	0.692803	0.739986	0.780578	0.761611	0.86093	0.653416	0.765993
	1.29233							0.528332	1.19907		1.70952	4.30444	0.402411	0.573839		30	0.571764	0.612511	0.688469	0.603142	0.561724	0.513478	0.64633	0.845748	0.690539	0.58681	0.685617	0.52719	0.645	0.485704	0.652143	0.662965	0.644425	0.607498	0.601088	0.548846	0.724701	0.700126	0.64073	0.809462	0.586897	0.733398	0.62369	0.713678	0.735178	0.733635	0.781582	0.714275	0.706882
	1.17887							0.59902	1.44419		1.09416		0.528244	0.495583		35	0.485364	0.524193	0.530439	0.588666	0.688653	0.592925	0.520363	0.706368	0.745569	0.577739	0.736284	0.502644	0.881	0.661792	0.570549	0.671966	0.792801	0.748018	0.547353	0.605011	0.826773	0.728383	0.615039	0.764597	0.616011	0.754223	0.596677	0.624372	0.738313	0.786591	0.69202	0.708752	0.559894
	1.31788							0.794015	1.10152		1.15996		0.479283	0.229422		40	0.497494	0.475659	0.622074	0.689054	0.633669	0.531929	0.675122	0.65106	0.684521	0.620711	0.733607	0.605653	0.871	0.626745	0.699855	0.690207	0.574576	0.679777	0.553912	0.434791	0.747581	0.744383	0.605886	0.709533	0.619576	0.769003	0.611049	0.69728	0.704852	0.645019	0.81529	0.646086	0.663181
								0.60946	1.20579		1.72393		0.528062	0.184295		45	0.439084	0.402544	0.621457	0.608328	0.653721	0.519015	0.641032	0.707676	0.740915	0.639221	0.617722	0.500691	0.961	0.718	0.681239	0.559783	0.617387	0.556716	0.549884	0.422625	0.705689	0.702813	0.716745	0.819521	0.726798	0.72574	0.614221	0.684112	0.649484	0.71791	0.718624	0.538378	0.602979
								0.800085	1.02827		1.03798		0.546826	0.324915		50	0.48009	0.395333	0.53806	0.651254	0.709081	0.50974	0.552621	0.688826	0.538787	0.600344	0.687619	0.562093	0.631	0.742071	0.643446	0.48916	0.622279	0.641854	0.516	0.419707	0.734059	0.64615	0.638133	0.773256	0.644122	0.678015	0.626071	0.668821	0.685821	0.7243	0.631779	0.705191	0.64091
								0.59929	0.898878		1.1451		0.540462	0.232248		55	0.584578	0.502462	0.54973	0.598044	0.643287	0.453074	0.499656	0.635094	0.630817	0.630401	0.593881	0.539765	0.391	0.747812	0.557132	0.566505	0.476068	0.455349	0.469108	0.435038	0.768489	0.641964	0.637524	0.706692	0.694149	0.651705	0.559174	0.561235	0.624429	0.75637	0.65621	0.614152	0.684056
								0.765584	0.776165		0.861806		0.459619	0.417568		60	0.491202	0.496696	0.495305	0.497865	0.704873	0.601835	0.613868	0.526153	0.579027	0.582469	0.618055	0.577244	0.529	0.485497	0.613131	0.52705	0.541426	0.547599	0.465239	0.623099	0.812344	0.645493	0.6084	0.711574	0.748387	0.586786	0.597647	0.625862	0.74712	0.773142	0.585438	0.601504	0.528809
								0.662653	0.915595		0.846002		0.310873	0.826839		65	0.562716	0.406921	0.548514	0.516687	0.617015	0.561029	0.611426	0.599686	0.602204	0.73605	0.550903	0.505084	0.433	0.471731	0.572383	0.549504	0.63785	0.619458	0.490871	0.460215	0.775067	0.650038	0.620911	0.76668	0.706394	0.681769	0.60808	0.756099	0.627565	0.808953	0.575311	0.562751	0.61903
								0.666119			1.03798		0.449803	0.870027		70	0.523931	0.439534	0.485411	0.544319	0.599932	0.564054	0.616193	0.560339	0.735805	0.685764	0.656318	0.661001	0.546	0.417217	0.651801	0.587574	0.672044	0.547572	0.531553	0.468439	0.807685	0.69947	0.659252	0.66811	0.690272	0.571458	0.51477	0.729509	0.666168	0.543723	0.616303	0.630562	0.622761
								0.81125			1.1451		0.41218	0.574057		75	0.571285	0.436177	0.520831	0.532982	0.681843	0.587808	0.674455	0.63715	0.605718	0.753954	0.61899	0.521567	0.423	0.515945	0.622797	0.63357	0.553911	0.521401	0.515805	0.582981	0.807273	0.795727	0.656956	0.72963	0.753393	0.774548	0.5487	0.577912	0.507889	0.561986	0.608487	0.689638	0.612721
								0.596812			0.809278		0.443627	0.120572		80	0.478902	0.501118	0.547046	0.480891	0.567352	0.636508	0.653441	0.547077	0.576203	0.608555	0.680973	0.547851	0.419	0.45763	0.691168	0.629282	0.647619	0.471332	0.518062	0.360152	0.89537	0.657165	0.601126	0.73867	0.737592	0.617127	0.540151	0.568439	0.554427	0.614956	0.566667	0.67605	0.552656
								0.821172			0.917766		0.243246	0.501871		85	0.607564	0.570357	0.519212	0.597985	0.548927	0.610043	0.694213	0.607233	0.621345	0.673603	0.553954	0.621772	0.503	0.555931	0.614673	0.598871	0.653765	0.573939	0.491118	0.50026	0.772314	0.808783	0.513044	0.732782	0.556315	0.564149	0.634227	0.519479	0.491078	0.536407	0.585026	0.58025	0.580413
								0.692803			1.09752		0.227258	0.229449		90	0.467718	0.611811	0.557434	0.574415	0.558289	0.563592	0.591759	0.520761	0.608789	0.454278	0.682515	0.566882	0.536	0.643626	0.602847	0.604852	0.605061	0.606313	0.51676	0.528306	0.719325	0.677133	0.642676	0.808645	0.704118	0.662463	0.578926	0.736807	0.626585	0.539545	0.674817	0.650762	0.535209
								0.739986			0.805632		0.29959	0.203318		95	0.526692	0.478544	0.632074	0.577016	0.624467	0.645594	0.664633	0.627713	0.676073	0.528435	0.545105	0.512308	0.509	0.460615	0.568094	0.560903	0.595267	0.530764	0.477962	0.50533	0.760708	0.665645	0.686228	0.746552	0.528921	0.581936	0.538032	0.578014	0.558451	0.498495	0.612696	0.620568	0.554317
								0.780578			2.12461		0.426888	0.408265		100	0.543601	0.480242	0.643207	0.507133	0.56444	0.605307	0.720789	0.604424	0.638879	0.582032	0.510694	0.625032	0.641	0.611909	0.57484	0.667821	0.613762	0.5286	0.478312	0.663265	0.684907	0.646058	0.624611	0.706199	0.592847	0.558352	0.50922	0.651568	0.623044	0.657444	0.646658	0.614946	0.556737
								0.761611			1.83648		0.38888			105	0.520198	0.487029	0.577856	0.457703	0.718321	0.578016	0.693278	0.696858	0.560066	0.532662	0.700559	0.604441	0.396	0.379799	0.542224	0.497648	0.690457	0.473429	0.532274	0.719947	0.616476	0.660879	0.635075	0.730094		0.57947	0.588649	0.670298	0.634791	0.550769	0.719038	0.662134
								0.86093			1.51		0.381345
								0.653416			2.28945		0.643534
								0.765993			0.84676		0.408124			N/O
								0.612624			1.00686		0.187365
								0.555943			1.41197		0.112149			VPCs
											1.64305		0.22565			Time (min)	DQM298
											1.77259		0.190517			-120	0.407322		0.383071		0.370758		0.263359		0.236912		0.516358		0.38954	0.368281	0.613633	0.810453	0.38678	0.456562	0.254058	0.596554
											1.39786		0.21022			-110	0.34474		0.486854		0.384202		0.278843		0.317716		0.540194		0.368973	0.34649	0.538719	0.864916	0.419455	0.486679	0.289551	0.560453
											1.10412		0.351705			-105	0.399049		0.475442		0.358159		0.328723		0.354458		0.442209		0.40045	0.384958	0.608342	0.872883	0.346017	0.425591	0.330525	0.590999
											1.05424		0.0895466			-100	0.421053		0.446218		0.34969		0.340404		0.267615		0.322621		0.368229	0.369565	0.561191	0.812421	0.380536	0.449724	0.292996	0.567069
											1.20929		0.434385			-95	0.609687		0.450909		0.399694		0.355438		0.598483		0.400774		0.495613	0.453177	0.719342	0.904538	0.338647	0.320253	0.552652	0.692011
											1.75988		0.187365			-90	0.437085		0.50956		0.324894		0.425216		0.268923		0.515623		0.412981	0.375088	0.73019	0.659858	0.428293	0.551916	0.464547	0.701214
											1.28494		0.112149			-85	0.494537		0.453175		0.356395		0.294779		0.364658		0.866564		0.494956	0.336118	0.664715	0.726381	0.434738	0.548238	0.556195	0.476858
											1.13371		0.22565			-80	0.432394		0.54441		0.37502		0.199463		0.293489		0.508978		0.334544	0.517554	0.670726	0.818263	0.635724	0.636134	0.427589	0.858883
											1.57911		0.190517			-75	0.544099		0.6122		0.436381		0.367397		0.683341		0.616101		0.356646	0.380875	0.701036	0.911969	0.735151	0.343224	0.345215	0.900201
											1.33261		0.171172			-70	0.737893		0.745398		0.454002		0.539572		0.543857		0.863254		0.486067	0.469206	0.586535	0.782742	0.603738	0.49129	0.375277	0.670733
											1.29125		0.201051			-65	0.795406		0.81587		0.493938		0.681245		0.512071		0.625393		0.670805	0.471967	0.608625	0.855529	0.478411	0.570113	0.409589	0.666227
											1.25337		0.230585			-60	0.744229		0.653487		0.7478		0.611345		0.741855		0.514198		0.539617	0.508161	0.607918	0.907875	0.477372	0.480868	0.303645	0.590254
											1.17648		0.138971			-55	0.816588		0.590729		0.669346		0.603194		0.525211		0.425405		0.76691	0.534085	0.650267	0.975334	0.649495	0.60314	0.363888	1.05847
											2.1226		0.162943			-50	0.861806		0.570454		0.6592		0.609969		0.412813		0.632745		0.480103	0.525423	0.810808	0.901031	0.508692	0.585784	0.467713	0.686236
											1.84462		0.284987			-45	0.765292		0.633721		0.668393		0.582942		0.618092		0.58069		0.78086	0.696875	0.70038	0.798559	0.723184	0.585029	0.398456	0.852958
											2.19348		0.125041			-40	0.65237		0.696925		0.631965		0.566951		0.597795		0.901419		0.594459	0.747864	0.666585	1.09156	0.642001	0.461929	0.564385	0.898985
											0.782331		0.275689			-35	0.792776		0.595791		0.733179		0.663392		0.708444		0.883078		0.779953	0.628201	0.739778	1.08008	0.726946	0.369888	0.584875	0.963656
											1.50008		0.237864			-30	0.815428		0.62204		0.516433		1.0389		0.809278		0.917766		0.732359	0.791238		0.857594	0.611986	0.565808	0.552684	0.789116
											1.53336		0.47683			-25	0.857878		0.689147		0.846527		1.1451		0.685507		0.926254		0.591036	0.388989		1.1507	0.624675	0.805632	0.771233	0.745099
											1.78131		0.321184			-20	0.968648		0.846002		1.03798		1.10342		0.72204		0.888873		0.926084			0.897052	0.704101	0.676554	0.584581	0.86416	0.863459												1.32431
											1.2095		0.38033			-15	0.905347		0.453742		0.367245		0.860673		0.541265		0.64368					1.18495	1.09752	0.643558	0.712233	1.07163	1.47504		1.83648			1.01296		1.27204					1.51
											1.52564		0.497949			-10	0.601235		0.192987		0.44625		0.51215		0.398252		0.452036					1.05535	0.469729	0.680603	0.360824		2.12461		1.39884			0.681307		0.621023		0.532878		0.991769	1.46454
											1.33204		0.615495			-5	0.760803		0.680212		0.543282		1.16945		0.612166		0.71594										1.02705		0.703104			0.533292		0.812442		0.924243		0.822335	0.774758
											1.28882		0.417649			0	0.985347	0.82776	1.03008	0.912128	1.32937	1.14876	0.982829	1.17164	0.767802	0.641618	1.07534	0.614249									1.05769	0.955482	0.848053	1.16422	0.755033	0.961205	1.01439	1.35944	0.979591	0.864534	0.579445	0.806388	0.947791
											0.782331		0.542046			5	0.88882	0.760947	0.766388	0.665685	0.583398	0.569558	0.49763	0.430089	0.592561	0.501685	0.881249	0.460597									0.362749	0.492641	0.606088	0.703149	0.43891	0.589251	0.634817	0.728554	0.658154	0.550806	0.545895	0.56437	0.574338
											1.50008		0.352063			10	0.373038	0.750796	0.569579	0.654027	0.541334	0.226964	0.476756	0.652103	0.405677	0.268031	0.53592	0.457904									0.228259	0.46272	0.38023	0.368198	0.29879	0.343567	0.295187	0.456114	0.470536	0.62074	0.510913	0.552389	0.438431
											1.87611		0.423344			15	0.427337	0.552064	0.43635	0.439932	0.293881	0.272926	0.424075	0.236405	0.202676	0.177434	0.361805	0.175364									0.33999	0.345229	0.235616	0.236178	0.315884	0.301391	0.276766	0.49946	0.381066	0.54085	0.407387	0.543012	0.426008
											1.23315		0.251241			20	0.208813	0.367303	0.294454	0.382169	0.159605	0.153812	0.275471	0.22965	0.173532	0.235984	0.193098	0.215271									0.333686	0.313576	0.195295	0.218918	0.219036	0.231185	0.212968	0.397801	0.36829	0.620055	0.484791	0.567104	0.450349
											1.46382		0.19458			25	0.21022	0.351705	0.0895465	0.434385	0.187365	0.112149	0.22565	0.190517	0.171172	0.201051	0.230585	0.138971									0.162943	0.284987	0.125041	0.275689	0.237864	0.47683	0.321184	0.38033	0.497949	0.615495	0.417649	0.542046	0.352063
											1.63146		0.337218			30	0.220035	0.306794	0.237478	0.296192	0.21972	0.242071	0.213748	0.130223	0.167476	0.222779	0.154429	0.154861									0.378287	0.351751	0.155655	0.205217	0.29968	0.520272	0.320163	0.558701	0.575462	0.549768	0.432523	0.606995	0.433466
											1.05791		0.16317			35	0.215453	0.297443	0.250781	0.309537	0.209415	0.116216	0.225503	0.226656	0.132063	0.211748	0.122514	0.165321									0.201515	0.355569	0.152607	0.267258	0.268008	0.475438	0.412544	0.568636	0.492068	0.655727	0.611171	0.427867	0.466341
											1.93072		0.189939			40	0.212612	0.331348			0.144594	0.188088	0.210692	0.136793	0.128874	0.169671	0.223175	0.1694									0.253535	0.242025	0.13302	0.298846	0.411829	0.403737	0.310319	0.559096	0.507659	0.542282	0.480854	0.458086	0.476118
											1.70924		0.215581			45					0.109272	0.163966	0.155513	0.135905	0.16274	0.234633	0.154943	0.146104									0.239654	0.318539	0.160248	0.317584	0.41093	0.52551	0.485862	0.603105	0.40267	0.548231	0.625255	0.607277	0.418059
											1.67487		0.164281			50					0.150834	0.14229	0.289978	0.207022	0.145335	0.235707	0.223872	0.142694									0.401833	0.335734	0.196564	0.388532	0.428901	0.598341	0.469528	0.641562	0.433375	0.555087	0.820709	0.568868	0.482385
											1.86266		0.150623			55					0.145035	0.18143	0.432659	0.123264	0.222418	0.259677	0.13754	0.143113									0.451584	0.390895	0.241479	0.4271	0.375494	0.552991	0.473244	0.522305	0.446541	0.471477	0.7602	0.638562	0.479235
											1.67301		0.51802			60					0.155452	0.24478	0.267556	0.252738													0.398593	0.367251	0.341148	0.46651	0.525719	0.748843	0.756768	0.877255	0.413656	0.416701	0.764033	0.600985	0.504451
											1.77577		0.526379			65					0.247284	0.334118	0.393306	0.184571													0.355588	0.273685	0.342246	0.402185	0.41043	0.590957	0.487114	0.608949	0.577288	0.494382	0.692472	0.616754	0.586351
											1.43639		0.113939			70					0.17164	0.229902	0.204142	0.150461													0.455217	0.344283	0.457792	0.410253	0.450677	0.60328	0.543431	0.532712	0.412913	0.404069	0.549264	0.541844	0.561891
											1.2975		0.126815			75					0.184131	0.347545	0.22278	0.16078													0.519587	0.302464	0.492501	0.379169	0.399753	0.532554	0.480348	0.52048	0.634824	0.512439	0.562199	0.554172	0.540512
											1.67301		0.286995			80					0.180154	0.368443	0.322096	0.154511													0.392769	0.637603	0.392229	0.483183	0.398921	0.64744	0.580861	0.650344	0.549154	0.614064	0.53874	0.513475	0.555922
											1.27538		0.318279			85					0.333876	0.310385	0.160966	0.288485													0.379684	0.741764	0.349586	0.369897	0.363636	0.573274	0.470054	0.617647	0.526058	0.610028	0.766494	0.583355
													0.345618			90					0.275997	0.178123	0.380192	0.158635													0.797524	0.917198	0.2656	0.366677	0.457387	0.604844	0.46014	0.583872	0.64848	0.563385	0.857417	0.552371
													0.34737			95					0.237663	0.43589	0.205844	0.180305													0.675701	1.00278	0.289361	0.351358	0.414254	0.600092	0.563949	0.620142	0.646369	0.531167	0.842113	0.655728
													0.233958			100
													0.45127
													0.462197
													0.271401			G/N/O
													0.456817			SMs
													0.4816				DQM298																											DQM543
													0.48577			Time (min)	Cell 1	Cell 2	Cell 3	Cell 4	Cell 5	Cell 6	Cell 7	Cell 8	Cell 9	Cell 10	Cell 11	Cell 12	Cell 13	Cell 14	Cell 15	Cell 16	Cell 17	Cell 18	Cell 19	Cell 20	Cell 21	Cell 22	Cell 23	Cell 24	Cell 25	Cell 26		Cell 1	Cell 2	Cell 3	Cell 4	Cell 5	Cell 6
													0.5001			-40	1.1907		1.08181				0.989436		1.05538										1.30012		0.939366							2.33096		1.96547		1.93668
													0.317319			-35	1.24823		1.15784				1.45578		1.15478										1.56502		0.907423							2.10268		2.47164		2.10731
													0.266431			-30	1.36078		1.08116				1.40723		1.16622										1.39903		1.16077							2.72107		2.40121		2.59014
													0.198627			-25	1.46929		1.17605				1.47654		1.12153										1.35944		1.46391				0.985746			1.98867		2.14844		3.10053
													0.540353			-20	1.42558		1.18478				1.34978		1.09462										1.45497		1.82179				1.02308			0.992539		2.30617		2.65573
													0.51078			-15	1.41379		1.18962		1.44088		1.42602		1.00176										1.21378		1.90907				1.17602			1.04791		0.805531		0.738958
													0.293814			-10	1.16032		0.653291		1.06682		1.46038		0.643437						1.32449				1.03731		0.7335		1.12512		0.487926			1.25332		0.963413		1.06943
													0.459698			-5	0.773667		0.70263		0.602269		0.534291		0.650479						0.876431				0.957731		0.938707		0.721093		0.75262			1.08471	1.19463	1.509	1.37691	1.41189	1.15273
																0	0.828498	0.701952	0.838369	0.718084	0.928276	1.11896	1.32639	1.06797	0.69955	0.660718	0.707305	0.618325	1.43976	1.24761	1.13305	1.18706	1.11886	1.12796	1.16453	0.56542	0.946202	1.20378	0.90169		0.739247	0.888158		0.895049	0.848561	0.950689	1.02822	0.89266	0.93534
																5	0.613381	0.630753	0.718876	0.799085	0.881829	0.825377	0.569544	0.564373	0.610402	0.633419	0.843955	0.56735	0.582126	0.74472	0.764191	0.871167	0.82738	0.852852	0.934277	1.47625	1.21903	1.48967	0.628435	0.642965	0.748966	0.655307		0.903333	0.810105	0.842704	0.939602	0.990693	1.03179
	J															10	0.621524	0.657874	0.708421	0.732825	0.61205	0.643825	0.576461	0.650394	0.578889	0.517974	0.653694	0.579413	0.643136	0.762209	0.57352	0.685164	0.724428	0.770696	0.718096	0.491767	0.98245	0.91877	0.525892	0.500799	0.640039	0.473407		0.877008	0.771787	0.862673	0.789528	1.00252	0.941924
	cdk-1 RNAi															15	0.789857	0.650013	0.55031	0.65208	0.5634	0.525285	0.548739	0.633255	0.521444	0.508415	0.699505	0.546031	0.450591	0.547724	0.524661	0.503038	0.582528	0.717589	0.592515	0.678583	0.70274	1.01126	0.610798	0.477358	0.661442	0.622124		0.880914	0.733047	0.779065	0.821588	1.11084	0.948011
	DQM298 (GFP)	DQM543 (2xmK2)														20	0.603966	0.799576	0.48503	0.667868	0.572819	0.557787	0.581508	0.622865	0.48979	0.551142	0.589665	0.622237	0.433889	0.584385	0.576132	0.491497	0.521224	0.68441	0.592976	0.573898	0.700163	0.873161	0.53962	0.596583	0.644934	0.495918		0.633343	0.805403	0.729239	0.780811	1.19125	1.04895
	0.913427	2.33983														25	0.701337	0.733148	0.580162	0.722911	0.628478	0.561384	0.534537	0.469476	0.430716	0.450044	0.656317	0.556747	0.523021	0.648801	0.630924	0.525048	0.507597	0.597469	0.593481	0.512615	0.818261	0.827632	0.463858	0.590365	0.603055	0.482461		0.655582	0.649158	0.786208	0.775615	1.22004	0.968301
	0.991757	1.38364														30	0.546624	0.608929	0.511396	0.672072	0.531432	0.547969	0.526157	0.490601	0.402985	0.453274	0.570507	0.55833	0.595623	0.446957	0.609849	0.545159	0.642363	0.596331	0.60936	0.578838	0.572306	0.668437	0.586043	0.574915	0.410477	0.564903		0.736991	0.762335	0.883092	0.834625	1.1208	1.05712
	0.63542	3.54921														35	0.717238	0.840389	0.465598	0.643391	0.60187	0.604982	0.64653	0.61679	0.373008	0.48226	0.573069	0.588275			0.595639	0.573571	0.589239	0.722402	0.6	0.555972	0.528172	0.756094	0.649605	0.570189	0.524535	0.59977		0.694941		0.706234	0.781974	1.12602	1.36583
	1.27785	1.95077														40			0.56169	0.552353	0.527151	0.502031	0.564889	0.560792	0.35435	0.517074	0.762124	0.451691			0.496506	0.659401	0.530401	0.648625	0.625527	0.52888	0.53821	0.54265	0.536527	0.670777	0.502794	0.565241						1.12283	1.07674
	0.937806	2.61505														45			0.537779	0.5855	0.533591	0.468187	0.581454	0.547019	0.369914	0.508832					0.564228	0.636508	0.526635	0.617811	0.566769	0.509512	0.46757	0.656327	0.560281	0.559368	0.628081	0.487818						1.1271	1.05678
	1.03653	1.86795														50			0.518235	0.555748	0.535434	0.526112	0.5636	0.571593	0.343627	0.461572					0.54336	0.58227	0.559445	0.596147	0.576031	0.495812	0.465287	0.536169	0.565325	0.592428	0.557203	0.511446						1.30863	1.21543
	1.02105	3.23369														55			0.558164	0.558262	0.493854	0.527575	0.625242	0.623401	0.411092	0.48851					0.705243	0.637973	0.610502	0.67935	0.541887	0.579703	0.437237	0.569253	0.513784	0.567189	0.361918	0.532419						1.17355	1.00656
	0.603444	1.81278														60			0.542321	0.576757	0.5556	0.50429	0.538651	0.523313	0.412603	0.548686					0.453881	0.582066	0.546974	0.711351	0.590635	0.494407	0.469721	0.685125	0.510545	0.546205	0.448968	0.544807						1.12451	1.00505
	0.987831	2.46928														65			0.510858	0.643822	0.528139	0.512795	0.546771	0.60387	0.368132	0.521347					0.48346	0.528142	0.611539	0.698687	0.55882	0.644837	0.494866	0.553604	0.537366	0.628987	0.389864	0.465212						1.11577	0.966717
	0.734996															70			0.538111	0.55248	0.471267	0.529617	0.530157	0.536793	0.380641	0.571121					0.482199	0.597098	0.561076	0.630783	0.536551	0.450608	0.460708	0.611173	0.530913	0.540071	0.348116	0.467631						1.18787	0.901148
	0.926315															75			0.511384	0.475791	0.551298	0.423443	0.61218	0.633154	0.399497	0.579779					0.462631	0.644782	0.437486	0.649796	0.648629	0.454246	0.551372	0.598595	0.519765	0.422173	0.296621	0.473514						1.30468	0.963303
	1.55427															80			0.438625	0.698713	0.490149	0.497383	0.580249	0.60996	0.461997	0.568299					0.3782	0.519031	0.466758	0.515092	0.454045	0.510165	0.485276	0.608336	0.550928	0.432156	0.381348	0.505336						1.15417	1.0429
	1.5826															85			0.539853	0.529601	0.498376	0.451827	0.645994	0.619132	0.436127	0.595401					0.36991	0.482962	0.492859	0.534085	0.459263	0.42639	0.488117	0.664534	0.517704	0.421429	0.457876	0.442613						1.21247	1.0259
	1.1667															90			0.487513	0.609359	0.439225	0.472801	0.642716	0.654386	0.455059	0.608669					0.387822	0.511729	0.429508	0.527537	0.558027	0.411714	0.494979	0.544781	0.548985	0.41974	0.41003	0.522045						1.27076	1.07766
	0.973145															95			0.50079	0.556083	0.51898	0.404775	0.600097	0.587004	0.440157	0.607136					0.398969	0.45823	0.420786	0.511489	0.506804	0.486014			0.48097	0.376659	0.445243	0.502363						1.14008	1.07605
	0.986483															100			0.443486	0.541894	0.519314	0.484272	0.686723	0.557293	0.430668	0.616787					0.406568	0.392549	0.454013	0.471604	0.47789	0.539899			0.465875	0.412295	0.473937	0.521739						1.04881	1.04708
	0.696057															105			0.485177	0.539062	0.535119	0.52515	0.650277	0.521605	0.45482	0.607393					0.42229	0.661867	0.44666	0.468691	0.545593	0.562346			0.544564	0.357412	0.429094	0.473186
	1.18429
	1.55855
	0.777942
	0.962538
	0.751139
	0.767498
	M
	Sex Myoblasts			Uterine			VPCs
	G1	S		G1	S		G1	S
	0.917965	0.650588		0.947537	0.908869		0.245629	0.95837
	1.01956	0.705956		0.769547	1.03681		0.209764	1.14002
	0.733041	0.859999		0.997734	0.903246		0.474421	1.42954
	0.794477	0.953914		1.00108	1.1125		0.371192	1.19038
	0.851668	0.634608		0.891211	0.959535		0.335797	0.906042
	0.851574	0.744621		1.07973	1.06371		0.190301	0.849966
	0.891941	0.615357		0.735725	0.892883		0.233742	1.17344
	1.28814	0.665513		0.891211	0.973513		0.206411	1.06274
	0.728845	0.50627		1.00108	1.16946		0.294076	0.823678
	0.843544	0.582863		0.966582			0.410412	0.655392
				0.916439			0.263117
				0.738282			0.195513
				0.905729
				0.906252
				0.819147
[truncated: 32 more columns]
