# Supplementary material for: Visualizing the metazoan proliferation-quiescence decision in vivo
Source: eLife. 2020 Dec 22;9:e63265. doi: 10.7554/eLife.63265 (PMC7880687; doi:10.7554/eLife.63265)
Supplement: Figure 2—source data 1. — Raw data of DHB ratios used to generate Figure 2C, F and G in Microsoft Excel format. [file elife-63265-fig2-data1.xlsx]

## Sheet: Figure 2
Figure 2
	C	SM 2-4										SM 4-8																SM 8-16
	Time (min)	Cell 1	Cell 2	Cell 3	Cell 4	Cell 5	Cell 6	Cell 7	Cell 8	Cell 9	Cell 10	Cell 11	Cell 12	Cell 13	Cell 14	Cell 15	Cell 16	Cell 17	Cell 18	Cell 19	Cell 20	Cell 21	Cell 22	Cell 23	Cell 24	Cell 25	Cell 26	Cell 27	Cell 28	Cell 29	Cell 30	Cell 31	Cell 32	Cell 33	Cell 34	Cell 35	Cell 36	Cell 37	Cell 38	Cell 39	Cell 40	Cell 41
	-120	0.624215		0.918656
	-115	0.767701		1.1143
	-110	0.714552		1.06013
	-105	0.831986		1.19024
	-100	0.816282		1.34963
	-95	0.89383		1.12867
	-90	1.1218		1.01337
	-85	0.918137		0.927077
	-80	0.858244		1.11904
	-75	0.94454		0.905631						1.12047
	-70	0.923887		1.35204						1.01117
	-65	0.842561		1.24085						1.09991
	-60	0.972122		1.05609						1.04134
	-55	1.07627		1.09465				1.10883		0.946412
	-50	1.06412		1.3581				1.10996		1.01406
	-45	1.20103		1.15909				1.34609		0.960863
	-40	1.1907		1.08181				0.989436		1.05538
	-35	1.24823		1.15784				1.45578		1.15478
	-30	1.36078		1.08116				1.40723		1.16622
	-25	1.46929		1.17605				1.47654		1.12153
	-20	1.42558		1.18478				1.34978		1.09462
	-15	1.41379		1.18962		1.44088		1.42602		1.00176
	-10	1.16032		0.653291		1.06682		1.46038		0.643437
	-5	0.773667		0.70263		0.602269		0.534291		0.650479
	0	0.828498	0.701952	0.838369	0.718084	0.928276	1.11896	1.32639	1.06797	0.69955	0.660718
	5	0.613381	0.630753	0.718876	0.799085	0.881829	0.825377	0.569544	0.564373	0.610402	0.633419
	10	0.621524	0.657874	0.708421	0.732825	0.61205	0.643825	0.576461	0.650394	0.578889	0.517974
	15	0.789857	0.650013	0.55031	0.65208	0.5634	0.525285	0.548739	0.633255	0.521444	0.508415
	20	0.603966	0.799576	0.48503	0.667868	0.572819	0.557787	0.581508	0.622865	0.48979	0.551142
	25	0.701337	0.733148	0.580162	0.722911	0.628478	0.561384	0.534537	0.469476	0.430716	0.450044
	30	0.546624	0.608929	0.511396	0.672072	0.531432	0.547969	0.526157	0.490601	0.402985	0.453274
	35	0.717238	0.840389	0.465598	0.643391	0.60187	0.604982	0.64653	0.61679	0.373008	0.48226
	40			0.56169	0.552353	0.527151	0.502031	0.564889	0.560792	0.35435	0.517074
	45			0.537779	0.5855	0.533591	0.468187	0.581454	0.547019	0.369914	0.508832
	50			0.518235	0.555748	0.535434	0.526112	0.5636	0.571593	0.343627	0.461572
	55			0.558164	0.558262	0.493854	0.527575	0.625242	0.623401	0.411092	0.48851
	60			0.542321	0.576757	0.5556	0.50429	0.538651	0.523313	0.412603	0.548686
	65			0.510858	0.643822	0.528139	0.512795	0.546771	0.60387	0.368132	0.521347
	70			0.538111	0.55248	0.471267	0.529617	0.530157	0.536793	0.380641	0.571121
	75			0.511384	0.475791	0.551298	0.423443	0.61218	0.633154	0.399497	0.579779
	80			0.438625	0.698713	0.490149	0.497383	0.580249	0.60996	0.461997	0.568299
	85			0.539853	0.529601	0.498376	0.451827	0.645994	0.619132	0.436127	0.595401
	90			0.487513	0.609359	0.439225	0.472801	0.642716	0.654386	0.455059	0.608669
	95			0.50079	0.556083	0.51898	0.404775	0.600097	0.587004	0.440157	0.607136
	100			0.443486	0.541894	0.519314	0.484272	0.686723	0.557293	0.430668	0.616787
	105			0.485177	0.539062	0.535119	0.52515	0.650277	0.521605	0.45482	0.607393
	110			0.565452	0.631584	0.537247	0.464556	0.651219	0.541188	0.480951	0.592637
	115					0.508918	0.537099	0.571555	0.459928	0.526469	0.58713											0.562816
	120					0.511339	0.508744	0.612215	0.502329	0.460977	0.667018											0.620892
	125					0.470339	0.487166	0.655102	0.580234	0.48043	0.529456											0.751237
	130					0.499007	0.47005	0.655246	0.596314	0.489002	0.453304											0.829883
	135					0.519523	0.517615	0.605314	0.565882	0.477851	0.497101											0.797104
	140					0.480274	0.520162	0.63338	0.599868	0.54893	0.550333									0.929876		1.01031
	145					0.49397	0.5116	0.594575	0.623687	0.489866	0.592612									0.97009		1.05227
	150					0.440046	0.529341	0.816938	0.7241	0.519785	0.514517									0.988225		0.956838
	155					0.505233	0.5616	0.805425	0.686489	0.532877	0.587177									1.02404		0.940228
	160					0.597108	0.602378	0.862037	0.780258	0.539704	0.562715									1.22737		0.91279
	165					0.548095	0.596376	0.830795	0.768916	0.676943	0.604877									1.30012		0.939366
	170							0.979061	0.862916											1.56502		0.907423
	175							0.855117	0.853095											1.39903		1.16077
	180							1.19279	1.04928											1.35944		1.46391				0.985746
	185							1.35793	1.1777											1.45497		1.82179				1.02308
	190							1.23309	1.16094											1.21378		1.90907				1.17602
	195							1.30577	1.17283							1.32449				1.03731		0.7335		1.12512		0.487926
	200							0.83185	0.984258							0.876431				0.957731		0.938707		0.721093		0.75262
	205											0.707305	0.618325	1.43976	1.24761	1.13305	1.18706	1.11886	1.12796	1.16453	0.56542	0.946202	1.20378	0.90169		0.739247	0.888158
	210											0.843955	0.56735	0.582126	0.74472	0.764191	0.871167	0.82738	0.852852	0.934277	1.47625	1.21903	1.48967	0.628435	0.642965	0.748966	0.655307
	215											0.653694	0.579413	0.643136	0.762209	0.57352	0.685164	0.724428	0.770696	0.718096	0.491767	0.98245	0.91877	0.525892	0.500799	0.640039	0.473407
	220											0.699505	0.546031	0.450591	0.547724	0.524661	0.503038	0.582528	0.717589	0.592515	0.678583	0.70274	1.01126	0.610798	0.477358	0.661442	0.622124
	225											0.589665	0.622237	0.433889	0.584385	0.576132	0.491497	0.521224	0.68441	0.592976	0.573898	0.700163	0.873161	0.53962	0.596583	0.644934	0.495918
	230											0.656317	0.556747	0.523021	0.648801	0.630924	0.525048	0.507597	0.597469	0.593481	0.512615	0.818261	0.827632	0.463858	0.590365	0.603055	0.482461
	235											0.570507	0.55833	0.595623	0.446957	0.609849	0.545159	0.642363	0.596331	0.60936	0.578838	0.572306	0.668437	0.586043	0.574915	0.410477	0.564903
	240											0.573069	0.588275			0.595639	0.573571	0.589239	0.722402	0.6	0.555972	0.528172	0.756094	0.649605	0.570189	0.524535	0.59977
	245											0.762124	0.451691			0.496506	0.659401	0.530401	0.648625	0.625527	0.52888	0.53821	0.54265	0.536527	0.670777	0.502794	0.565241
	250															0.564228	0.636508	0.526635	0.617811	0.566769	0.509512	0.46757	0.656327	0.560281	0.559368	0.628081	0.487818
	255															0.54336	0.58227	0.559445	0.596147	0.576031	0.495812	0.465287	0.536169	0.565325	0.592428	0.557203	0.511446
	260															0.705243	0.637973	0.610502	0.67935	0.541887	0.579703	0.437237	0.569253	0.513784	0.567189	0.361918	0.532419
	265															0.453881	0.582066	0.546974	0.711351	0.590635	0.494407	0.469721	0.685125	0.510545	0.546205	0.448968	0.544807
	270															0.48346	0.528142	0.611539	0.698687	0.55882	0.644837	0.494866	0.553604	0.537366	0.628987	0.389864	0.465212
	275															0.482199	0.597098	0.561076	0.630783	0.536551	0.450608	0.460708	0.611173	0.530913	0.540071	0.348116	0.467631
	280															0.462631	0.644782	0.437486	0.649796	0.648629	0.454246	0.551372	0.598595	0.519765	0.422173	0.296621	0.473514
	285															0.3782	0.519031	0.466758	0.515092	0.454045	0.510165	0.485276	0.608336	0.550928	0.432156	0.381348	0.505336
	290															0.36991	0.482962	0.492859	0.534085	0.459263	0.42639	0.488117	0.664534	0.517704	0.421429	0.457876	0.442613
	295															0.387822	0.511729	0.429508	0.527537	0.558027	0.411714	0.494979	0.544781	0.548985	0.41974	0.41003	0.522045
	300															0.398969	0.45823	0.420786	0.511489	0.506804	0.486014			0.48097	0.376659	0.445243	0.502363
	305															0.406568	0.392549	0.454013	0.471604	0.47789	0.539899			0.465875	0.412295	0.473937	0.521739
	310															0.42229	0.661867	0.44666	0.468691	0.545593	0.562346			0.544564	0.357412	0.429094	0.473186
	315															0.467243	0.426746	0.491745	0.528836	0.528807	0.573312			0.709571	0.537553	0.422602	0.622965
	320															0.390173	0.555592	0.515481	0.56301	0.518561	0.47975			0.588429	0.460877	0.487171	0.556985
	325															0.372618	0.590579	0.505263	0.482044					0.694163	0.686587	0.380577	0.607298
	330															0.423293	0.458426	0.463084	0.478472					0.685885	0.677811	0.398683	0.709278
	335															0.469547	0.554961	0.426145	0.491693					0.669781	0.596944	0.414415	0.602371
	340															0.409305	0.4987	0.449506	0.638174					0.790293	0.440602	0.653611	0.66183
	345															0.460674	0.402762	0.53539	0.618909					0.845383	0.662231	0.574282	0.741745
	350															0.474403	0.503187	0.471931	0.549021					0.835115	0.734181	0.577215	0.802696
	355															0.473459	0.404779	0.532043	0.493706					0.642865	0.628261	0.654233	0.59434
	360															0.508527	0.466077	0.534949	0.577925					0.567914	0.486876	0.711089	0.504559
	365															0.45134	0.290938	0.487294	0.51379					0.552077	0.619625	0.647845	0.643885
	370															0.417022	0.427327	0.552616	0.515998					0.573433	0.722654	0.673945	0.62631
	375																0.452404	0.437813	0.640101					0.710556	0.822097	0.830744	0.692849
	380																	0.474582	0.626922					0.60737	0.833087	0.789622	0.559863
	385																	0.488551	0.64959					0.690797	0.691042	0.773971	0.613532
	390																							0.747723	0.709841	0.466224	0.626157
	395																							0.846883	0.580348	0.72888	0.765363
	400																							0.624206	0.692714	0.740481	0.66702
	405																							0.653328	0.695171	0.569902	0.584358
	410																							0.667195	0.896742	0.735281	0.67467	0.744734
	415																							0.708563	0.723128	0.777141	0.697005	0.782213
	420																							0.813757	0.820002	0.96582	0.721429	0.926987
	425																							0.951554	0.826612	0.983421	0.795276	0.96367
	430																							0.955684	0.949257	0.621179	0.900302	1.10742						0.873012
	435																							0.912915	0.977378	0.656287	0.777166	1.02499						1.00868
	440																							0.996019	1.4544	0.778764	0.719685	1.03633		0.807434				1.05938
	445																							1.36653	1.17857	0.826478	0.977848	0.995263		0.825471		0.626649		1.15824
	450																							1.07859	1.19619	0.873002	1.04039	1.05861		0.853289		0.993768		1.33475
	455																							0.954632	1.29482	0.900533	0.92	0.993814		0.870889		0.999723		1.25049
	460																							1.18299	1.12512	0.802174	0.943128	0.973615		0.897162		1.08698		1.15107
	465																							1.01899	1.00278	0.883187	0.794562	0.979062		0.852584		1.12559		1.03117
	470																							1.28047	1.1191	0.774624	1.02687	0.972556		0.874638		1.19171		1.1292
	475																							0.931887	1.18486	0.682387	0.812112	0.987228		0.869908		1.11118		1.14254
	480																							1.32514	1.24072	0.873817	0.973641	0.9865		0.879972		0.907818		1.284
	485																							0.999051	1.144			0.968974		0.913874		0.895175		1.37674
	490																							1.10289	1.2706			1.15782		0.848202		0.974332		1.23162
	495																							1.04992	1.17342			1.07333		0.917499		0.979557		1.35494
	500																											1.18717		0.867474		1.14007		1.07132								0.764907
	505																											1.10637		0.817981		0.973002		1.22876								0.781526
	510																											1.14534		0.841447		1.06973		1.16788								0.861205
	515																											1.0686		0.860944		1.08641		1.12788								0.886825
	520																											1.07749		0.909839		1.13214		1.2963								1.02267
	525																											1.0657		1.07081		1.39121		1.17262								1.00989
	530																											1.12131		0.89749		1.1692		1.18496								1.20883
	535																											1.36585		1.03287		1.26095		1.20981								1.09049
	540																											1.33862		1.09219		1.31479		1.25737								1.1454
	545																											1.2164		1.00525		1.27705		1.1054		1.21931		1.01618				1.21297
	550																											1.31998		0.890296		1.29304		1.17944		1.25078		1.13906				1.02809
	555																											1.497		1.23833		1.31205		1.33241		1.33268		1.01557		1.11327		1.31788
	560																											1.42675		1.28848		0.955878		1.39333		1.75041		1.29233		1.17887		1.02558
	565																											0.680121		0.601934		0.925121		0.859208		0.75188		0.978478		0.706655		1.2902
	570																											0.976982		0.842791		0.997701		0.248378		0.906813		0.704637		0.650274		0.477303
	575																											1.02802	1.14635	0.281321	1.16785	0.898453	1.29952	1.12244	1.15251	0.575451	0.692915	0.786471	0.758627	0.933028	1.00261	1.33628
	580																											0.77168	0.62565	0.549291	0.631156	0.627868	0.789021	0.849276	0.509486	0.480818	0.40141	0.53156	0.474224	0.526979	0.606371	1.18819
	585																											0.62156	0.597285	0.47701	0.402885	0.535768	0.522648	0.654714	0.499899	0.349753	0.333787	0.441078	0.45165	0.481591	0.572636	1.32318
	590																											0.75902	0.563885	0.382898	0.362081	0.385842	0.675017	0.582594	0.461427	0.301418	0.217878	0.343487	0.357561	0.37017	0.419518	0.672047
	595																													0.388463	0.355165	0.419123	0.649996	0.550091	0.540422	0.25411	0.248523	0.328255	0.302371	0.271755	0.343628	0.579208
	600																													0.31071	0.257504	0.492061	0.42348	0.375394	0.340056	0.187264	0.145858	0.171946	0.312326	0.201523	0.257513	0.571756
	605																													0.316477	0.238468	0.457356	0.343458	0.380864	0.376168	0.238024	0.190587	0.19691	0.231434	0.189676	0.149939	0.511565
	610																													0.26742	0.208436	0.374103	0.323782	0.271593		0.154028	0.186635	0.135535	0.170229	0.173649	0.19859	0.387994
	615																													0.28889	0.276078	0.386904	0.347578			0.162626	0.151534	0.134689	0.179302	0.17574	0.134409	0.375595
	620																													0.291611	0.278074	0.5004	0.328431			0.162564	0.133463	0.162941	0.199344	0.182616	0.11832	0.390799
	625																															0.358933	0.313035			0.144341	0.161339	0.192297	0.230885	0.136752	0.132949	0.353061
	630																																			0.132961	0.149861	0.226023	0.214982	0.132747	0.143985
	635																																			0.153321	0.147779	0.241302	0.219069	0.131865	0.170173
	640																																			0.147056	0.184168	0.228667	0.243436	0.126216	0.151724
	645																																			0.193831	0.168113	0.164303	0.194927	0.155192	0.203898
	650																																			0.16592	0.15067	0.166949	0.165962	0.178387	0.183716
	655																																			0.145492	0.191682	0.1766	0.17316	0.16136	0.189409
	660																																			0.149963	0.180268	0.177079	0.190061	0.163378	0.182501
	665																																			0.18272	0.171224	0.160981	0.170252	0.162138	0.179553
	670																																			0.147047		0.165537	0.162988	0.178996	0.163099
	675																																							0.168123	0.186619
	680																																							0.183537	0.174981
	F	Preterminal																																				Terminal
	Time (min)	Cell 1	Cell 2	Cell 3	Cell 4	Cell 5	Cell 6	Cell 7	Cell 8	Cell 9	Cell 10	Cell 11	Cell 12	Cell 13	Cell 14	Cell 15	Cell 16	Cell 17	Cell 18	Cell 19	Cell 20	Cell 21	Cell 22	Cell 23	Cell 24	Cell 25	Cell 26	Cell 27	Cell 28	Cell 29	Cell 30	Cell 31	Cell 32	Cell 33	Cell 34	Cell 35		Cell 1	Cell 2	Cell 3	Cell 4	Cell 5	Cell 6	Cell 7	Cell 8	Cell 9	Cell 10	Cell 11	Cell 12
	-85					0.678821		0.680817
	-80					0.697337		0.761085
	-75					0.709566		0.747847																1.05448
	-70					0.803371		0.839687																1.2245
	-65					0.749953		0.852487																1.0702
	-60			0.880239		0.889169		0.954156																1.16071
	-55			0.836872		1.0567		1.04395								0.802483								1.26098
	-50			0.944548		1.11556		1.18572								0.898384								1.26055
	-45			1.077		0.885664		1.1114								0.957607								1.05092
	-40	0.794585		1.19332		1.06414		1.11361						0.793256		0.971114								1.30941
	-35	0.753926		1.43629		1.08291		1.26354						0.906123		0.975013								1.24971
	-30	0.856567		1.24504		1.01864		1.06339						0.986491		1.11392								1.35194														1.50313								0.996979		0.925921
	-25	1.08202		1.53283		1.12749		1.17498						1.2214		1.09537								1.32125			1.14733				1.4048		0.868584					1.7291								1.038		0.929156
	-20	1.4112		1.29694		1.28576		1.55284		0.919817		0.86934		1.25864		1.21413		1.28027						1.04583			1.35103		1.69033		1.12256		0.895436													1.08201		0.998428
	-15	1.27601		1.37646		1.39459		1.38843		0.804488		1.02596		0.589366		1.3268		1.34879				1.13047		0.756329			1.42695		0.681784		1.21208		0.853117					1.37792								0.891581		0.870264
	-10	1.2948		0.733064		0.840461		0.767408		0.46625		1.06573		0.574313		0.941536		0.763835		1.33468		0.744575		0.965759			1.11794		0.97368		0.933931		1.02598		0.48271			0.50958				1.68413		1.23663		0.889132		0.702404
	-5	0.477786		0.671526		0.959583		0.954898		0.685604		0.554451		0.685261		0.749809		0.983106		0.723664		0.808417		0.986171			0.79619		0.181942		0.891282		0.623633		0.750664			0.357028				0.846304		0.617459		1.19633		0.686019
	0	0.950881	1.03008	0.754597	0.978746	0.802326	0.74398	0.703099	0.933639	0.747053	0.549821	0.764139	0.666727	0.773536	1.03601	0.949223	0.88596	1.13614	1.08394	1.06968	1.26601	0.868905	0.902333	0.792659	0.999715		1.19873	0.797652	1.02331	0.894972	0.743695	0.907645	0.674814	0.984668	0.798752	1.19571		0.987765	0.864238	0.659591	0.659591	0.975509	0.90109	0.582592	0.836797	0.822734	0.986014	1.01602	1.27435
	5	0.640626	0.96199	0.547381	0.687396	0.710251	0.751398	0.683228	0.74499	0.737949	0.544271	0.82266	0.817382	0.789998	0.672983	0.859192	0.720684	0.861234	0.837261	0.826375	0.950264	0.756003	0.733795	0.699606	0.920789	0.692653	0.805093	0.824026	0.947947	0.766562	0.786399	0.878978	0.904521	0.785058	0.662628	0.842201		0.980088	0.763704	0.743732	0.743732	1.13328	0.791872	0.850805	0.837049	0.538547	0.831905	0.674388	1.02257
	10	0.590598	0.594879	0.579029	0.546994	0.512475	0.662528	0.420917	0.681758	0.710123	0.523022	0.798095	0.759199	0.722878	0.65717	0.627733	0.665442	0.770514	0.696024	0.628563	0.795886	0.764319	0.681474	0.691623	0.739143	0.646952	0.744791	0.661764	0.902835	0.748137	0.867597	0.892553	0.700326	0.627971	0.58684	0.606168		0.694294	0.694821	0.617145	0.617145	1.08221	0.684956	0.800089	0.659645	0.460524	0.552492	0.675936	1.11641
	15	0.560785	0.674507	0.600947	0.551548	0.61912	0.555855	0.585567	0.76863	0.606266	0.495554	0.7776	0.749662	0.80999	0.681173	0.606695	0.643918	0.794167	0.681159	0.605974	0.610241	0.878394	0.729646	0.667834	0.781959	0.649295	0.783224	0.712169	0.840102	0.782797	0.708783	0.797554	0.721144	0.755743	0.674055	0.67441		0.622279	0.556328	0.600468	0.600468	0.924435	0.733979	0.686403	0.506621	0.495488	0.564089	0.68027	1.00918
	20	0.504444	0.681869	0.598471	0.602385	0.590408	0.542044	0.668878	0.660771	0.671372	0.518463	0.699296	0.495602	0.751328	0.816487	0.660775	0.638412	0.755674	0.673417	0.871103	0.632254	0.677837	0.696832	0.64973	0.900167	0.746477	0.822617	0.741104	0.746467	0.761108	0.86484	0.689305	0.662608	0.723706	0.728426	0.683445		0.711866	0.512711	0.500128	0.500128	0.754194	0.654505	0.556071	0.458383	0.505101	0.452727	0.630526	0.826416
	25	0.582893	0.655409	0.554769	0.724265	0.546915	0.574738	0.619323	0.800275	0.675103	0.463518	0.755937	0.544603	0.691593	0.639075	0.528332	0.59902	0.794015	0.60946	0.800085	0.59929	0.765584	0.662653	0.666119	0.81125	0.596812	0.821172	0.692803	0.739986	0.780578	0.761611	0.86093	0.653416	0.765993	0.612624	0.555943		0.521999	0.437213	0.418028	0.418028	0.622768	0.444157	0.44349	0.413832	0.418903	0.499682	0.667291	0.856632
	30	0.571764	0.612511	0.688469	0.603142	0.561724	0.513478	0.64633	0.845748	0.690539	0.58681	0.685617	0.52719	0.645431	0.485704	0.652143	0.662965	0.644425	0.607498	0.601088	0.548846	0.724701	0.700126	0.64073	0.809462	0.586897	0.733398	0.62369	0.713678	0.735178	0.733635	0.781582	0.714275	0.706882	0.82152	0.621948		0.453538	0.402052	0.426926	0.426926	0.58774	0.471244	0.385171	0.337143	0.408615	0.404984	0.602947	0.603888
	35	0.485364	0.524193	0.530439	0.588666	0.688653	0.592925	0.520363	0.706368	0.745569	0.577739	0.736284	0.502644	0.880569	0.661792	0.570549	0.671966	0.792801	0.748018	0.547353	0.605011	0.826773	0.728383	0.615039	0.764597	0.616011	0.754223	0.596677	0.624372	0.738313	0.786591	0.69202	0.708752	0.559894	0.687759	0.630614		0.5137	0.197548	0.423396	0.423396	0.417366	0.390263	0.477199	0.428855	0.405208	0.460637	0.549081	0.64664
	40	0.497494	0.475659	0.622074	0.689054	0.633669	0.531929	0.675122	0.65106	0.684521	0.620711	0.733607	0.605653	0.871342	0.626745	0.699855	0.690207	0.574576	0.679777	0.553912	0.434791	0.747581	0.744383	0.605886	0.709533	0.619576	0.769003	0.611049	0.69728	0.704852	0.645019	0.81529	0.646086	0.663181	0.695192	0.603816		0.51175	0.234142	0.361419	0.361419	0.389628	0.348905	0.350242	0.3849	0.368296	0.464463	0.478497	0.516403
	45	0.439084	0.402544	0.621457	0.608328	0.653721	0.519015	0.641032	0.707676	0.740915	0.639221	0.617722	0.500691	0.961132	0.718	0.681239	0.559783	0.617387	0.556716	0.549884	0.422625	0.705689	0.702813	0.716745	0.819521	0.726798	0.72574	0.614221	0.684112	0.649484	0.71791	0.718624	0.538378	0.602979	0.756502	0.655385		0.413166	0.191411	0.291372	0.291372	0.428503	0.372015	0.246225	0.360874	0.326533	0.432074	0.459802	0.489431
	50	0.48009	0.395333	0.53806	0.651254	0.709081	0.50974	0.552621	0.688826	0.538787	0.600344	0.687619	0.562093	0.630622	0.742071	0.643446	0.48916	0.622279	0.641854	0.516	0.419707	0.734059	0.64615	0.638133	0.773256	0.644122	0.678015	0.626071	0.668821	0.685821	0.7243	0.631779	0.705191	0.64091	0.668343	0.737047		0.337446	0.171716	0.245088	0.245088	0.455494	0.308448	0.259513	0.219408	0.357436	0.431145	0.53034	0.392904
	55	0.584578	0.502462	0.54973	0.598044	0.643287	0.453074	0.499656	0.635094	0.630817	0.630401	0.593881	0.539765	0.391479	0.747812	0.557132	0.566505	0.476068	0.455349	0.469108	0.435038	0.768489	0.641964	0.637524	0.706692	0.694149	0.651705	0.559174	0.561235	0.624429	0.75637	0.65621	0.614152	0.684056	0.759623	0.770879		0.384626	0.19597	0.266237	0.266237	0.505995	0.323591	0.208088	0.249865	0.339831	0.331514	0.427025	0.450163
	60	0.491202	0.496696	0.495305	0.497865	0.704873	0.601835	0.613868	0.526153	0.579027	0.582469	0.618055	0.577244	0.528557	0.485497	0.613131	0.52705	0.541426	0.547599	0.465239	0.623099	0.812344	0.645493	0.6084	0.711574	0.748387	0.586786	0.597647	0.625862	0.74712	0.773142	0.585438	0.601504	0.528809	0.766071	0.783188		0.378917	0.175734	0.170566	0.170566	0.398564	0.355744	0.292697	0.212825	0.241204	0.321411	0.505726	0.453331
	65	0.562716	0.406921	0.548514	0.516687	0.617015	0.561029	0.611426	0.599686	0.602204	0.73605	0.550903	0.505084	0.432809	0.471731	0.572383	0.549504	0.63785	0.619458	0.490871	0.460215	0.775067	0.650038	0.620911	0.76668	0.706394	0.681769	0.60808	0.756099	0.627565	0.808953	0.575311	0.562751	0.61903	0.675033	0.750272		0.40898	0.174982	0.177792	0.177792	0.372913	0.30564	0.223013	0.209212	0.324705	0.273986	0.440109	0.434581
	70	0.523931	0.439534	0.485411	0.544319	0.599932	0.564054	0.616193	0.560339	0.735805	0.685764	0.656318	0.661001	0.546222	0.417217	0.651801	0.587574	0.672044	0.547572	0.531553	0.468439	0.807685	0.69947	0.659252	0.66811	0.690272	0.571458	0.51477	0.729509	0.666168	0.543723	0.616303	0.630562	0.622761	0.687702	0.71957		0.400256	0.15223	0.213163	0.213163	0.462178	0.219836	0.302104	0.234875	0.27128	0.26708	0.235384	0.406875
	75	0.571285	0.436177	0.520831	0.532982	0.681843	0.587808	0.674455	0.63715	0.605718	0.753954	0.61899	0.521567	0.422956	0.515945	0.622797	0.63357	0.553911	0.521401	0.515805	0.582981	0.807273	0.795727	0.656956	0.72963	0.753393	0.774548	0.5487	0.577912	0.507889	0.561986	0.608487	0.689638	0.612721	0.635462	0.800447		0.416274	0.144585	0.157281	0.157281	0.430676	0.289108	0.201527	0.313266	0.209277		0.390604	0.27312
	80	0.478902	0.501118	0.547046	0.480891	0.567352	0.636508	0.653441	0.547077	0.576203	0.608555	0.680973	0.547851	0.419452	0.45763	0.691168	0.629282	0.647619	0.471332	0.518062	0.360152	0.89537	0.657165	0.601126	0.73867	0.737592	0.617127	0.540151	0.568439	0.554427	0.614956	0.566667	0.67605	0.552656	0.700047	0.691621		0.341843	0.229398	0.160386	0.160386	0.334318	0.31053	0.230027	0.306933			0.411867	0.363211
	85	0.607564	0.570357	0.519212	0.597985	0.548927	0.610043	0.694213	0.607233	0.621345	0.673603	0.553954	0.621772	0.503431	0.555931	0.614673	0.598871	0.653765	0.573939	0.491118	0.50026	0.772314	0.808783	0.513044	0.732782	0.556315	0.564149	0.634227	0.519479	0.491078	0.536407	0.585026	0.58025	0.580413	0.701613	0.759098		0.354998	0.173479	0.159765	0.159765	0.331683	0.249859	0.22467	0.272466			0.262131	0.183425
	90	0.467718	0.611811	0.557434	0.574415	0.558289	0.563592	0.591759	0.520761	0.608789	0.454278	0.682515	0.566882	0.536193	0.643626	0.602847	0.604852	0.605061	0.606313	0.51676	0.528306	0.719325	0.677133	0.642676	0.808645	0.704118	0.662463	0.578926	0.736807	0.626585	0.539545	0.674817	0.650762	0.535209	0.767524	0.739856		0.390507	0.184796	0.18989	0.18989	0.29074	0.21932	0.202245	0.224182			0.281779	0.290985
	95	0.526692	0.478544	0.632074	0.577016	0.624467	0.645594	0.664633	0.627713	0.676073	0.528435	0.545105	0.512308	0.508999	0.460615	0.568094	0.560903	0.595267	0.530764	0.477962	0.50533	0.760708	0.665645	0.686228	0.746552	0.528921	0.581936	0.538032	0.578014	0.558451	0.498495	0.612696	0.620568	0.554317	0.783172	0.789109		0.514167	0.203887	0.173962	0.173962	0.32031	0.21315	0.240119	0.233313				0.324717
	100	0.543601	0.480242	0.643207	0.507133	0.56444	0.605307	0.720789	0.604424	0.638879	0.582032	0.510694	0.625032	0.64091	0.611909	0.57484	0.667821	0.613762	0.5286	0.478312	0.663265	0.684907	0.646058	0.624611	0.706199	0.592847	0.558352	0.50922	0.651568	0.623044	0.657444	0.646658	0.614946	0.556737	0.782883	0.719192		0.420663	0.218548	0.184493	0.184493	0.223224	0.320213	0.162891	0.232726				0.208837
	105	0.520198	0.487029	0.577856	0.457703	0.718321	0.578016	0.693278	0.696858	0.560066	0.532662	0.700559	0.604441	0.396165	0.379799	0.542224	0.497648	0.690457	0.473429	0.532274	0.719947	0.616476	0.660879	0.635075	0.730094		0.57947	0.588649	0.670298	0.634791	0.550769	0.719038	0.662134		0.685008	0.715616		0.400498	0.21291	0.195648	0.195648	0.230449	0.296412	0.21197	0.210158
	110	0.508071	0.385097	0.591679	0.445969	0.549142	0.634501	0.68774	0.60945	0.598898	0.549242	0.583164	0.663814	0.424528	0.474908	0.596212	0.529465	0.685576	0.528807	0.443478	0.660896	0.629603	0.626482	0.569557	0.662893		0.677511	0.497666	0.766941	0.676352					0.719654	0.715292		0.360775	0.172478	0.179381	0.179381	0.21079	0.346902	0.214987	0.195744
	115	0.552089	0.334205	0.493202	0.439541	0.608716	0.533397	0.720188	0.549077	0.709491	0.496622	0.549078	0.5441	0.607915	0.583593	0.622761	0.57818	0.708145	0.502802	0.455577	0.672429	0.623159	0.716863	0.661941	0.748359													0.264692	0.200747	0.167504	0.167504	0.229599	0.263719	0.17831	0.220675
	120	0.353383	0.532193	0.580107	0.470844	0.630242	0.566921	0.642068	0.560729	0.628809	0.513668	0.589503	0.65775	0.459823	0.508042	0.693397	0.675676	0.611774	0.525249	0.482259	0.606182	0.653712	0.755576	0.527254	0.710387														0.170468	0.216383	0.216383	0.275989	0.202431	0.249299	0.212992
	125	0.384473	0.44591	0.557278	0.51103	0.578646	0.526517	0.708617	0.688669	0.717206	0.631171	0.574456	0.556813	0.798115	0.60705	0.627443	0.657072	0.578312	0.48463	0.483316	0.779513	0.602329	0.718696	0.636444	0.782055																	0.242788	0.309449	0.329759	0.250378
	130	0.470033	0.53147	0.557745	0.487294	0.646966	0.505563	0.673538	0.640887	0.628486	0.646388	0.66911	0.699393	0.445964	0.630022	0.682149	0.60356	0.57614	0.44815	0.415385	0.626403	0.627162	0.742318	0.700166	0.714449																	0.225114	0.359004	0.298039	0.274872
	135	0.43625	0.426521	0.653939	0.472049	0.670626	0.478999	0.672458	0.636043	0.540979	0.49032	0.607544	0.690259	0.562959	0.550648	0.70028	0.454305	0.615414	0.534931	0.380787	0.591523	0.606798	0.735647	0.633775	0.778479																	0.259068	0.256734	0.283065	0.201741
	140	0.469804	0.566972	0.510512	0.52852	0.782478	0.512125	0.680022	0.642194	0.653763	0.552624	0.642017	0.599064	0.484072	0.58439	0.540673	0.632295	0.610118	0.547051	0.402338	0.512553	0.632116	0.647687	0.695501	0.759328																	0.246367	0.223531	0.273013	0.216503
	145	0.512981	0.769023	0.649699	0.517666	0.629918	0.453162	0.670006	0.582503	0.604569	0.649399	0.678862	0.567186	0.766665	0.609521	0.606259	0.620552	0.654825	0.590734	0.481727	0.647235	0.630176	0.798719	0.642341	0.666573																	0.260457		0.323679	0.187294
	150	0.407743	0.627872	0.531031	0.549755	0.55248	0.533683	0.689739	0.713351	0.69222	0.570386	0.623581	0.510514	0.616584	0.690762	0.563655	0.670169	0.596357	0.753223	0.445758	0.533256	0.659141	0.792915	0.689792	0.75346
	155	0.517619	0.74443	0.723903	0.517669	0.733456	0.568849	0.586285	0.598096	0.580574	0.596034	0.606731	0.580649	0.749582	0.559611	0.548133	0.578721	0.50759	0.565846	0.433827	0.574066	0.667024	0.79464	0.632231	0.806708
	160	0.540944	0.615391	0.525639	0.479756					0.623443	0.621164	0.710788	0.63944	0.670607	0.549262	0.607581	0.618862			0.453834	0.535102	0.607006	0.788568	0.654842	0.821206
	165	0.4956	0.633934	0.611388	0.491211					0.594609	0.569887	0.591035	0.540226	0.814066	0.487879	0.575926	0.634129			0.475739	0.604175	0.679923	0.748814	0.794601	0.688615
	170	0.465017	0.407524	0.598692	0.469376					0.754009	0.572095	0.563519	0.603997	0.520073	0.521862	0.57082	0.676718					0.695101	0.890668
	175	0.501552	0.438275	0.502042	0.461013					0.721403	0.577802	0.553712	0.537257	0.594947	0.571906	0.538004	0.561681					0.784542	0.736269
	180	0.540719	0.473436	0.575109	0.441687					0.760416	0.511807	0.670583	0.528938	0.594882	0.611784	0.622243	0.656508					0.679932	0.724136
	185	0.652342	0.516552							0.690438	0.562033	0.534642	0.524616	0.758578	0.478676	0.591912	0.574015					0.698493	0.64615
	190	0.584942	0.458934							0.672041	0.591	0.491805	0.519296	0.750663	0.535678							0.665884	0.683314
	195	0.512765	0.523053							0.660629	0.55119	0.666001	0.511053	0.828515	0.427349							0.741413	0.733578
	200	0.50197	0.559565							0.715806	0.575954	0.485851	0.59865	0.723662	0.56725							0.736349	0.702657
	205									0.797385	0.556134	0.557749	0.535969									0.68396	0.788807
	210									0.720172	0.509016	0.590208	0.656948									0.680876	0.808827
	215									0.759705	0.509804	0.555261	0.565556									0.626818	0.740496
	220									0.763674	0.644255	0.605846	0.655568									0.647861	0.700446
	G
	Sex Myoblasts				Uterine Cells
	HS 406	HS 394	406 Ctrl		HS 406	HS 394	406 Ctrl
	hs>CKI-1::BFP	rps-0>Dhb::mK2	hs>CKI-1::BFP		hs>CKI-1::BFP	rps-0>Dhb::mK2	hs>CKI-1::BFP
	0.178698	2.29947	0.058538		0.106739	0.714931	2.03686
	0.113345	4.58416	0.082028		0.148933	0.720455	0.720753
	0.0610471	1.82337	0.0690477		0.0581905	0.642718	0.752897
	0.119803	1.68167	1.44316		0.0583443	0.685771	2.01812
	0.0699234	1.97242	1.40764		0.0827275	0.722696	1.96472
	0.10243	2.73411	0.501058		0.0719312	1.87901	0.798869
	0.0439064	0.646025	0.553618		0.128923	0.660455	0.739226
	0.0427319	0.542169	0.526682		0.146142	0.684558	0.710242
	0.0813159	1.01264	0.584186		0.119378	0.683109	1.40058
	0.128023	1.05616	1.64134		0.0596528	0.626238	0.602776
	0.197235	0.523897	1.07624		0.14185	0.551368	0.743168
	0.197235	0.525587	1.35052		0.11603	0.631801	0.946736
	0.10045	0.519467	1.32507		0.0486775	0.50872	1.07355
	0.0679634	0.611577	0.607398		0.174756	0.610716	1.43052
	0.0903937	0.646939	0.599797		0.148489	0.579866	0.735406
	0.0958724	0.537806	0.680427		0.0278768	0.707422	1.20999
	0.234835	0.543305	0.750567		0.0825441	0.670849	1.44727
	0.146155	0.432947	0.976294		0.19201	0.567475	0.936344
	0.140444	1.66273	0.59138		0.150873	0.791473	1.26471
	0.0487357	1.37029	0.669322		0.146432	0.60021	0.772348
	0.0680895	0.515863	1.04987		0.102531	0.596408	0.867754
	0.117501	0.503045	1.29202		0.0805933	0.562336	0.771689
	0.120493	2.14863	2.76254		0.136296	0.547755	0.83032
	0.136566	1.91842	3.39609		0.140849	0.633265	1.00763
	0.0909295	0.367382	0.631301		0.0892774	0.551753	1.02091
	0.0480247	0.373618	0.668269		0.227255	0.79919	1.04618
	0.0685096	1.53093	0.767574		0.152509	0.435243	0.879953
	0.0675008	1.39286	0.591764		0.0678757	0.681836	0.726139
	0.0474629	0.334959	0.523069		0.0696523	2.30345	0.812683
	0.070592	0.360377	0.608451		0.210885	0.616727	0.649778
	0.0870563	1.30534	0.575899		0.215505	0.58312	0.717687
	0.112825	0.923145	0.588199		0.0747912	0.63211	0.914391
	0.0497031	0.798637	0.809592		0.0741921	0.631423	0.948972
	0.130981	0.785859	0.593371		0.126987	0.500494	0.857437
	0.0479027	1.20194	0.593726		0.0898769	0.475187	0.989819
	0.044064	0.771932	0.710053		0.0731908	0.643098	0.876482
		0.624885	0.487712
		0.562212	0.67446
		0.542792	0.606856
		0.459058	0.738124
		0.420048	1.81838
		0.380114	1.74296
		0.388415	3.92186
		0.360086	3.74183
		0.399906	0.453258
		0.417084	0.440002
			0.568563
			0.493007
			1.17742
			0.742088
			0.622029
			0.584496
			0.679275
			0.624521
			0.504061
			1.25781
			1.60666
			1.72758
			0.899775
			0.622125
			0.656455
			0.615455
			0.5611
[truncated: 1 more columns]
