# Supplementary material for: Visualizing the metazoan proliferation-quiescence decision in vivo
Source: eLife. 2020 Dec 22;9:e63265. doi: 10.7554/eLife.63265 (PMC7880687; doi:10.7554/eLife.63265)
Supplement: Figure 2—source data 2. — Raw data of DHB ratios used to generate Figure 2—figure supplement 1A–D in Microsoft Excel format. [file elife-63265-fig2-data2.xlsx]

## Sheet: Figure supp 2 - SM comp
Figure 2 - Figure suppelement 1 A-C
SM 4										Vs	SM 8																	SM 8																Vs	SM 16
0.828498	0.701952	0.838369	0.718084	0.928276	1.11896	1.32639	1.06797	0.69955	0.660718		0.707305	0.618325	1.43976	1.24761	1.13305	1.18706	1.11886	1.12796	1.16453	0.56542	0.946202	1.20378	0.90169		0.739247	0.888158		0.707305	0.618325	1.43976	1.24761	1.13305	1.18706	1.11886	1.12796	1.16453	0.56542	0.946202	1.20378	0.90169		0.739247	0.888158		1.02802	1.14635	0.281321	1.16785	0.898453
0.613381	0.630753	0.718876	0.799085	0.881829	0.825377	0.569544	0.564373	0.610402	0.633419		0.843955	0.56735	0.582126	0.74472	0.764191	0.871167	0.82738	0.852852	0.934277	1.47625	1.21903	1.48967	0.628435	0.642965	0.748966	0.655307		0.843955	0.56735	0.582126	0.74472	0.764191	0.871167	0.82738	0.852852	0.934277	1.47625	1.21903	1.48967	0.628435	0.642965	0.748966	0.655307		0.77168	0.62565	0.549291	0.631156	0.627868
0.621524	0.657874	0.708421	0.732825	0.61205	0.643825	0.576461	0.650394	0.578889	0.517974		0.653694	0.579413	0.643136	0.762209	0.57352	0.685164	0.724428	0.770696	0.718096	0.491767	0.98245	0.91877	0.525892	0.500799	0.640039	0.473407		0.653694	0.579413	0.643136	0.762209	0.57352	0.685164	0.724428	0.770696	0.718096	0.491767	0.98245	0.91877	0.525892	0.500799	0.640039	0.473407		0.62156	0.597285	0.47701	0.402885	0.535768
0.789857	0.650013	0.55031	0.65208	0.5634	0.525285	0.548739	0.633255	0.521444	0.508415		0.699505	0.546031	0.450591	0.547724	0.524661	0.503038	0.582528	0.717589	0.592515	0.678583	0.70274	1.01126	0.610798	0.477358	0.661442	0.622124		0.699505	0.546031	0.450591	0.547724	0.524661	0.503038	0.582528	0.717589	0.592515	0.678583	0.70274	1.01126	0.610798	0.477358	0.661442	0.622124		0.75902	0.563885	0.382898	0.362081	0.385842
0.603966	0.799576	0.48503	0.667868	0.572819	0.557787	0.581508	0.622865	0.48979	0.551142		0.589665	0.622237	0.433889	0.584385	0.576132	0.491497	0.521224	0.68441	0.592976	0.573898	0.700163	0.873161	0.53962	0.596583	0.644934	0.495918		0.589665	0.622237	0.433889	0.584385	0.576132	0.491497	0.521224	0.68441	0.592976	0.573898	0.700163	0.873161	0.53962	0.596583	0.644934	0.495918				0.388463	0.355165	0.419123
0.701337	0.733148	0.580162	0.722911	0.628478	0.561384	0.534537	0.469476	0.430716	0.450044		0.656317	0.556747	0.523021	0.648801	0.630924	0.525048	0.507597	0.597469	0.593481	0.512615	0.818261	0.827632	0.463858	0.590365	0.603055	0.482461		0.656317	0.556747	0.523021	0.648801	0.630924	0.525048	0.507597	0.597469	0.593481	0.512615	0.818261	0.827632	0.463858	0.590365	0.603055	0.482461				0.31071	0.257504	0.492061
0.546624	0.608929	0.511396	0.672072	0.531432	0.547969	0.526157	0.490601	0.402985	0.453274		0.570507	0.55833	0.595623	0.446957	0.609849	0.545159	0.642363	0.596331	0.60936	0.578838	0.572306	0.668437	0.586043	0.574915	0.410477	0.564903		0.570507	0.55833	0.595623	0.446957	0.609849	0.545159	0.642363	0.596331	0.60936	0.578838	0.572306	0.668437	0.586043	0.574915	0.410477	0.564903				0.316477	0.238468	0.457356
0.717238	0.840389	0.465598	0.643391	0.60187	0.604982	0.64653	0.61679	0.373008	0.48226		0.573069	0.588275			0.595639	0.573571	0.589239	0.722402	0.6	0.555972	0.528172	0.756094	0.649605	0.570189	0.524535	0.59977		0.573069	0.588275			0.595639	0.573571	0.589239	0.722402	0.6	0.555972	0.528172	0.756094	0.649605	0.570189	0.524535	0.59977				0.26742	0.208436	0.374103
		0.56169	0.552353	0.527151	0.502031	0.564889	0.560792	0.35435	0.517074		0.762124	0.451691			0.496506	0.659401	0.530401	0.648625	0.625527	0.52888	0.53821	0.54265	0.536527	0.670777	0.502794	0.565241		0.762124	0.451691			0.496506	0.659401	0.530401	0.648625	0.625527	0.52888	0.53821	0.54265	0.536527	0.670777	0.502794	0.565241				0.28889	0.276078	0.386904
		0.537779	0.5855	0.533591	0.468187	0.581454	0.547019	0.369914	0.508832						0.564228	0.636508	0.526635	0.617811	0.566769	0.509512	0.46757	0.656327	0.560281	0.559368	0.628081	0.487818						0.564228	0.636508	0.526635	0.617811	0.566769	0.509512	0.46757	0.656327	0.560281	0.559368	0.628081	0.487818				0.291611	0.278074	0.5004
		0.518235	0.555748	0.535434	0.526112	0.5636	0.571593	0.343627	0.461572						0.54336	0.58227	0.559445	0.596147	0.576031	0.495812	0.465287	0.536169	0.565325	0.592428	0.557203	0.511446						0.54336	0.58227	0.559445	0.596147	0.576031	0.495812	0.465287	0.536169	0.565325	0.592428	0.557203	0.511446						0.358933
		0.558164	0.558262	0.493854	0.527575	0.625242	0.623401	0.411092	0.48851						0.705243	0.637973	0.610502	0.67935	0.541887	0.579703	0.437237	0.569253	0.513784	0.567189	0.361918	0.532419						0.705243	0.637973	0.610502	0.67935	0.541887	0.579703	0.437237	0.569253	0.513784	0.567189	0.361918	0.532419
		0.542321	0.576757	0.5556	0.50429	0.538651	0.523313	0.412603	0.548686						0.453881	0.582066	0.546974	0.711351	0.590635	0.494407	0.469721	0.685125	0.510545	0.546205	0.448968	0.544807						0.453881	0.582066	0.546974	0.711351	0.590635	0.494407	0.469721	0.685125	0.510545	0.546205	0.448968	0.544807
		0.510858	0.643822	0.528139	0.512795	0.546771	0.60387	0.368132	0.521347						0.48346	0.528142	0.611539	0.698687	0.55882	0.644837	0.494866	0.553604	0.537366	0.628987	0.389864	0.465212						0.48346	0.528142	0.611539	0.698687	0.55882	0.644837	0.494866	0.553604	0.537366	0.628987	0.389864	0.465212
		0.538111	0.55248	0.471267	0.529617	0.530157	0.536793	0.380641	0.571121						0.482199	0.597098	0.561076	0.630783	0.536551	0.450608	0.460708	0.611173	0.530913	0.540071	0.348116	0.467631						0.482199	0.597098	0.561076	0.630783	0.536551	0.450608	0.460708	0.611173	0.530913	0.540071	0.348116	0.467631
		0.511384	0.475791	0.551298	0.423443	0.61218	0.633154	0.399497	0.579779						0.462631	0.644782	0.437486	0.649796	0.648629	0.454246	0.551372	0.598595	0.519765	0.422173	0.296621	0.473514						0.462631	0.644782	0.437486	0.649796	0.648629	0.454246	0.551372	0.598595	0.519765	0.422173	0.296621	0.473514
		0.438625	0.698713	0.490149	0.497383	0.580249	0.60996	0.461997	0.568299						0.3782	0.519031	0.466758	0.515092	0.454045	0.510165	0.485276	0.608336	0.550928	0.432156	0.381348	0.505336						0.3782	0.519031	0.466758	0.515092	0.454045	0.510165	0.485276	0.608336	0.550928	0.432156	0.381348	0.505336
		0.539853	0.529601	0.498376	0.451827	0.645994	0.619132	0.436127	0.595401						0.36991	0.482962	0.492859	0.534085	0.459263	0.42639	0.488117	0.664534	0.517704	0.421429	0.457876	0.442613						0.36991	0.482962	0.492859	0.534085	0.459263	0.42639	0.488117	0.664534	0.517704	0.421429	0.457876	0.442613
		0.487513	0.609359	0.439225	0.472801	0.642716	0.654386	0.455059	0.608669						0.387822	0.511729	0.429508	0.527537	0.558027	0.411714	0.494979	0.544781	0.548985	0.41974	0.41003	0.522045						0.387822	0.511729	0.429508	0.527537	0.558027	0.411714	0.494979	0.544781	0.548985	0.41974	0.41003	0.522045
		0.50079	0.556083	0.51898	0.404775	0.600097	0.587004	0.440157	0.607136						0.398969	0.45823	0.420786	0.511489	0.506804	0.486014			0.48097	0.376659	0.445243	0.502363						0.398969	0.45823	0.420786	0.511489	0.506804	0.486014			0.48097	0.376659	0.445243	0.502363
		0.443486	0.541894	0.519314	0.484272	0.686723	0.557293	0.430668	0.616787						0.406568	0.392549	0.454013	0.471604	0.47789	0.539899			0.465875	0.412295	0.473937	0.521739						0.406568	0.392549	0.454013	0.471604	0.47789	0.539899			0.465875	0.412295	0.473937	0.521739
		0.485177	0.539062	0.535119	0.52515	0.650277	0.521605	0.45482	0.607393						0.42229	0.661867	0.44666	0.468691	0.545593	0.562346			0.544564	0.357412	0.429094	0.473186						0.42229	0.661867	0.44666	0.468691	0.545593	0.562346			0.544564	0.357412	0.429094	0.473186
		0.565452	0.631584	0.537247	0.464556	0.651219	0.541188	0.480951	0.592637						0.467243	0.426746	0.491745	0.528836	0.528807	0.573312			0.709571	0.537553	0.422602	0.622965						0.467243	0.426746	0.491745	0.528836	0.528807	0.573312			0.709571	0.537553	0.422602	0.622965
				0.508918	0.537099	0.571555	0.459928	0.526469	0.58713						0.390173	0.555592	0.515481	0.56301	0.518561	0.47975			0.588429	0.460877	0.487171	0.556985						0.390173	0.555592	0.515481	0.56301	0.518561	0.47975			0.588429	0.460877	0.487171	0.556985
				0.511339	0.508744	0.612215	0.502329	0.460977	0.667018						0.372618	0.590579	0.505263	0.482044					0.694163	0.686587	0.380577	0.607298						0.372618	0.590579	0.505263	0.482044					0.694163	0.686587	0.380577	0.607298
				0.470339	0.487166	0.655102	0.580234	0.48043	0.529456						0.423293	0.458426	0.463084	0.478472					0.685885	0.677811	0.398683	0.709278						0.423293	0.458426	0.463084	0.478472					0.685885	0.677811	0.398683	0.709278
				0.499007	0.47005	0.655246	0.596314	0.489002	0.453304						0.469547	0.554961	0.426145	0.491693					0.669781	0.596944	0.414415	0.602371						0.469547	0.554961	0.426145	0.491693					0.669781	0.596944	0.414415	0.602371
				0.519523	0.517615	0.605314	0.565882	0.477851	0.497101						0.409305	0.4987	0.449506	0.638174					0.790293	0.440602	0.653611	0.66183						0.409305	0.4987	0.449506	0.638174					0.790293	0.440602	0.653611	0.66183
				0.480274	0.520162	0.63338	0.599868	0.54893	0.550333						0.460674	0.402762	0.53539	0.618909					0.845383	0.662231	0.574282	0.741745						0.460674	0.402762	0.53539	0.618909					0.845383	0.662231	0.574282	0.741745
				0.49397	0.5116	0.594575	0.623687	0.489866	0.592612						0.474403	0.503187	0.471931	0.549021					0.835115	0.734181	0.577215	0.802696						0.474403	0.503187	0.471931	0.549021					0.835115	0.734181	0.577215	0.802696
				0.440046	0.529341	0.816938	0.7241	0.519785	0.514517						0.473459	0.404779	0.532043	0.493706					0.642865	0.628261	0.654233	0.59434						0.473459	0.404779	0.532043	0.493706					0.642865	0.628261	0.654233	0.59434
				0.505233	0.5616	0.805425	0.686489	0.532877	0.587177						0.508527	0.466077	0.534949	0.577925					0.567914	0.486876	0.711089	0.504559						0.508527	0.466077	0.534949	0.577925					0.567914	0.486876	0.711089	0.504559
				0.597108	0.602378	0.862037	0.780258	0.539704	0.562715						0.45134	0.290938	0.487294	0.51379					0.552077	0.619625	0.647845	0.643885						0.45134	0.290938	0.487294	0.51379					0.552077	0.619625	0.647845	0.643885
				0.548095	0.596376	0.830795	0.768916	0.676943	0.604877						0.417022	0.427327	0.552616	0.515998					0.573433	0.722654	0.673945	0.62631						0.417022	0.427327	0.552616	0.515998					0.573433	0.722654	0.673945	0.62631
						0.979061	0.862916									0.452404	0.437813	0.640101					0.710556	0.822097	0.830744	0.692849							0.452404	0.437813	0.640101					0.710556	0.822097	0.830744	0.692849
						0.855117	0.853095										0.474582	0.626922					0.60737	0.833087	0.789622	0.559863								0.474582	0.626922					0.60737	0.833087	0.789622	0.559863
						1.19279	1.04928										0.488551	0.64959					0.690797	0.691042	0.773971	0.613532								0.488551	0.64959					0.690797	0.691042	0.773971	0.613532
						1.35793	1.1777																0.747723	0.709841	0.466224	0.626157														0.747723	0.709841	0.466224	0.626157
						1.23309	1.16094																0.846883	0.580348	0.72888	0.765363														0.846883	0.580348	0.72888	0.765363
						1.30577	1.17283																0.624206	0.692714	0.740481	0.66702														0.624206	0.692714	0.740481	0.66702
						0.83185	0.984258																0.653328	0.695171	0.569902	0.584358														0.653328	0.695171	0.569902	0.584358
																							0.667195	0.896742	0.735281	0.67467														0.667195	0.896742	0.735281	0.67467
																							0.708563	0.723128	0.777141	0.697005														0.708563	0.723128	0.777141	0.697005
																							0.813757	0.820002	0.96582	0.721429														0.813757	0.820002	0.96582	0.721429
																							0.951554	0.826612	0.983421	0.795276														0.951554	0.826612	0.983421	0.795276
																							0.955684	0.949257	0.621179	0.900302														0.955684	0.949257	0.621179	0.900302
																							0.912915	0.977378	0.656287	0.777166														0.912915	0.977378	0.656287	0.777166
																							0.996019	1.4544	0.778764	0.719685														0.996019	1.4544	0.778764	0.719685
																							1.36653	1.17857	0.826478	0.977848														1.36653	1.17857	0.826478	0.977848
																							1.07859	1.19619	0.873002	1.04039														1.07859	1.19619	0.873002	1.04039
																							0.954632	1.29482	0.900533	0.92														0.954632	1.29482	0.900533	0.92
																							1.18299	1.12512	0.802174	0.943128														1.18299	1.12512	0.802174	0.943128
																							1.01899	1.00278	0.883187	0.794562														1.01899	1.00278	0.883187	0.794562
																							1.28047	1.1191	0.774624	1.02687														1.28047	1.1191	0.774624	1.02687
																							0.931887	1.18486	0.682387	0.812112														0.931887	1.18486	0.682387	0.812112
																							1.32514	1.24072	0.873817	0.973641														1.32514	1.24072	0.873817	0.973641
																							0.999051	1.144																0.999051	1.144
																							1.10289	1.2706																1.10289	1.2706
																							1.04992	1.17342																1.04992	1.17342
																																								1.04992	1.17342
[truncated: 35 more columns]

## Sheet: Fig Supp 2 - Uterine comp
Figure 2 - Figure suppelement 1D
Pre terminal Uterine																																			VS	Terminal
0.950881	1.03008	0.754597	0.978746	0.802326	0.74398	0.703099	0.933639	0.747053	0.549821	0.764139	0.666727	0.773536	1.03601	0.949223	0.88596	1.13614	1.08394	1.06968	1.26601	0.868905	0.902333	0.792659	0.999715		1.19873	0.797652	1.02331	0.894972	0.743695	0.907645	0.674814	0.984668	0.798752	1.19571		0.987765	0.864238	0.659591	0.659591	0.975509	0.90109	0.582592	0.836797	0.822734	0.986014	1.01602	1.27435	0.914259
0.640626	0.96199	0.547381	0.687396	0.710251	0.751398	0.683228	0.74499	0.737949	0.544271	0.82266	0.817382	0.789998	0.672983	0.859192	0.720684	0.861234	0.837261	0.826375	0.950264	0.756003	0.733795	0.699606	0.920789	0.692653	0.805093	0.824026	0.947947	0.766562	0.786399	0.878978	0.904521	0.785058	0.662628	0.842201		0.980088	0.763704	0.743732	0.743732	1.13328	0.791872	0.850805	0.837049	0.538547	0.831905	0.674388	1.02257	0.820025
0.590598	0.594879	0.579029	0.546994	0.512475	0.662528	0.420917	0.681758	0.710123	0.523022	0.798095	0.759199	0.722878	0.65717	0.627733	0.665442	0.770514	0.696024	0.628563	0.795886	0.764319	0.681474	0.691623	0.739143	0.646952	0.744791	0.661764	0.902835	0.748137	0.867597	0.892553	0.700326	0.627971	0.58684	0.606168		0.694294	0.694821	0.617145	0.617145	1.08221	0.684956	0.800089	0.659645	0.460524	0.552492	0.675936	1.11641	0.680043
0.560785	0.674507	0.600947	0.551548	0.61912	0.555855	0.585567	0.76863	0.606266	0.495554	0.7776	0.749662	0.80999	0.681173	0.606695	0.643918	0.794167	0.681159	0.605974	0.610241	0.878394	0.729646	0.667834	0.781959	0.649295	0.783224	0.712169	0.840102	0.782797	0.708783	0.797554	0.721144	0.755743	0.674055	0.67441		0.622279	0.556328	0.600468	0.600468	0.924435	0.733979	0.686403	0.506621	0.495488	0.564089	0.68027	1.00918	0.519276
0.504444	0.681869	0.598471	0.602385	0.590408	0.542044	0.668878	0.660771	0.671372	0.518463	0.699296	0.495602	0.751328	0.816487	0.660775	0.638412	0.755674	0.673417	0.871103	0.632254	0.677837	0.696832	0.64973	0.900167	0.746477	0.822617	0.741104	0.746467	0.761108	0.86484	0.689305	0.662608	0.723706	0.728426	0.683445		0.711866	0.512711	0.500128	0.500128	0.754194	0.654505	0.556071	0.458383	0.505101	0.452727	0.630526	0.826416	0.540344
0.582893	0.655409	0.554769	0.724265	0.546915	0.574738	0.619323	0.800275	0.675103	0.463518	0.755937	0.544603	0.691593	0.639075	0.528332	0.59902	0.794015	0.60946	0.800085	0.59929	0.765584	0.662653	0.666119	0.81125	0.596812	0.821172	0.692803	0.739986	0.780578	0.761611	0.86093	0.653416	0.765993	0.612624	0.555943		0.521999	0.437213	0.418028	0.418028	0.622768	0.444157	0.44349	0.413832	0.418903	0.499682	0.667291	0.856632	0.560946
0.571764	0.612511	0.688469	0.603142	0.561724	0.513478	0.64633	0.845748	0.690539	0.58681	0.685617	0.52719	0.645431	0.485704	0.652143	0.662965	0.644425	0.607498	0.601088	0.548846	0.724701	0.700126	0.64073	0.809462	0.586897	0.733398	0.62369	0.713678	0.735178	0.733635	0.781582	0.714275	0.706882	0.82152	0.621948		0.453538	0.402052	0.426926	0.426926	0.58774	0.471244	0.385171	0.337143	0.408615	0.404984	0.602947	0.603888	0.396952
0.485364	0.524193	0.530439	0.588666	0.688653	0.592925	0.520363	0.706368	0.745569	0.577739	0.736284	0.502644	0.880569	0.661792	0.570549	0.671966	0.792801	0.748018	0.547353	0.605011	0.826773	0.728383	0.615039	0.764597	0.616011	0.754223	0.596677	0.624372	0.738313	0.786591	0.69202	0.708752	0.559894	0.687759	0.630614		0.5137	0.197548	0.423396	0.423396	0.417366	0.390263	0.477199	0.428855	0.405208	0.460637	0.549081	0.64664	0.3978
0.497494	0.475659	0.622074	0.689054	0.633669	0.531929	0.675122	0.65106	0.684521	0.620711	0.733607	0.605653	0.871342	0.626745	0.699855	0.690207	0.574576	0.679777	0.553912	0.434791	0.747581	0.744383	0.605886	0.709533	0.619576	0.769003	0.611049	0.69728	0.704852	0.645019	0.81529	0.646086	0.663181	0.695192	0.603816		0.51175	0.234142	0.361419	0.361419	0.389628	0.348905	0.350242	0.3849	0.368296	0.464463	0.478497	0.516403	0.352954
0.439084	0.402544	0.621457	0.608328	0.653721	0.519015	0.641032	0.707676	0.740915	0.639221	0.617722	0.500691	0.961132	0.718	0.681239	0.559783	0.617387	0.556716	0.549884	0.422625	0.705689	0.702813	0.716745	0.819521	0.726798	0.72574	0.614221	0.684112	0.649484	0.71791	0.718624	0.538378	0.602979	0.756502	0.655385		0.413166	0.191411	0.291372	0.291372	0.428503	0.372015	0.246225	0.360874	0.326533	0.432074	0.459802	0.489431	0.331544
0.48009	0.395333	0.53806	0.651254	0.709081	0.50974	0.552621	0.688826	0.538787	0.600344	0.687619	0.562093	0.630622	0.742071	0.643446	0.48916	0.622279	0.641854	0.516	0.419707	0.734059	0.64615	0.638133	0.773256	0.644122	0.678015	0.626071	0.668821	0.685821	0.7243	0.631779	0.705191	0.64091	0.668343	0.737047		0.337446	0.171716	0.245088	0.245088	0.455494	0.308448	0.259513	0.219408	0.357436	0.431145	0.53034	0.392904	0.363387
0.584578	0.502462	0.54973	0.598044	0.643287	0.453074	0.499656	0.635094	0.630817	0.630401	0.593881	0.539765	0.391479	0.747812	0.557132	0.566505	0.476068	0.455349	0.469108	0.435038	0.768489	0.641964	0.637524	0.706692	0.694149	0.651705	0.559174	0.561235	0.624429	0.75637	0.65621	0.614152	0.684056	0.759623	0.770879		0.384626	0.19597	0.266237	0.266237	0.505995	0.323591	0.208088	0.249865	0.339831	0.331514	0.427025	0.450163	0.271405
0.491202	0.496696	0.495305	0.497865	0.704873	0.601835	0.613868	0.526153	0.579027	0.582469	0.618055	0.577244	0.528557	0.485497	0.613131	0.52705	0.541426	0.547599	0.465239	0.623099	0.812344	0.645493	0.6084	0.711574	0.748387	0.586786	0.597647	0.625862	0.74712	0.773142	0.585438	0.601504	0.528809	0.766071	0.783188		0.378917	0.175734	0.170566	0.170566	0.398564	0.355744	0.292697	0.212825	0.241204	0.321411	0.505726	0.453331	0.301754
0.562716	0.406921	0.548514	0.516687	0.617015	0.561029	0.611426	0.599686	0.602204	0.73605	0.550903	0.505084	0.432809	0.471731	0.572383	0.549504	0.63785	0.619458	0.490871	0.460215	0.775067	0.650038	0.620911	0.76668	0.706394	0.681769	0.60808	0.756099	0.627565	0.808953	0.575311	0.562751	0.61903	0.675033	0.750272		0.40898	0.174982	0.177792	0.177792	0.372913	0.30564	0.223013	0.209212	0.324705	0.273986	0.440109	0.434581	0.35904
0.523931	0.439534	0.485411	0.544319	0.599932	0.564054	0.616193	0.560339	0.735805	0.685764	0.656318	0.661001	0.546222	0.417217	0.651801	0.587574	0.672044	0.547572	0.531553	0.468439	0.807685	0.69947	0.659252	0.66811	0.690272	0.571458	0.51477	0.729509	0.666168	0.543723	0.616303	0.630562	0.622761	0.687702	0.71957		0.400256	0.15223	0.213163	0.213163	0.462178	0.219836	0.302104	0.234875	0.27128	0.26708	0.235384	0.406875	0.307263
0.571285	0.436177	0.520831	0.532982	0.681843	0.587808	0.674455	0.63715	0.605718	0.753954	0.61899	0.521567	0.422956	0.515945	0.622797	0.63357	0.553911	0.521401	0.515805	0.582981	0.807273	0.795727	0.656956	0.72963	0.753393	0.774548	0.5487	0.577912	0.507889	0.561986	0.608487	0.689638	0.612721	0.635462	0.800447		0.416274	0.144585	0.157281	0.157281	0.430676	0.289108	0.201527	0.313266	0.209277		0.390604	0.27312	0.330936
0.478902	0.501118	0.547046	0.480891	0.567352	0.636508	0.653441	0.547077	0.576203	0.608555	0.680973	0.547851	0.419452	0.45763	0.691168	0.629282	0.647619	0.471332	0.518062	0.360152	0.89537	0.657165	0.601126	0.73867	0.737592	0.617127	0.540151	0.568439	0.554427	0.614956	0.566667	0.67605	0.552656	0.700047	0.691621		0.341843	0.229398	0.160386	0.160386	0.334318	0.31053	0.230027	0.306933			0.411867	0.363211	0.330968
0.607564	0.570357	0.519212	0.597985	0.548927	0.610043	0.694213	0.607233	0.621345	0.673603	0.553954	0.621772	0.503431	0.555931	0.614673	0.598871	0.653765	0.573939	0.491118	0.50026	0.772314	0.808783	0.513044	0.732782	0.556315	0.564149	0.634227	0.519479	0.491078	0.536407	0.585026	0.58025	0.580413	0.701613	0.759098		0.354998	0.173479	0.159765	0.159765	0.331683	0.249859	0.22467	0.272466			0.262131	0.183425	0.314659
0.467718	0.611811	0.557434	0.574415	0.558289	0.563592	0.591759	0.520761	0.608789	0.454278	0.682515	0.566882	0.536193	0.643626	0.602847	0.604852	0.605061	0.606313	0.51676	0.528306	0.719325	0.677133	0.642676	0.808645	0.704118	0.662463	0.578926	0.736807	0.626585	0.539545	0.674817	0.650762	0.535209	0.767524	0.739856		0.390507	0.184796	0.18989	0.18989	0.29074	0.21932	0.202245	0.224182			0.281779	0.290985	0.352426
0.526692	0.478544	0.632074	0.577016	0.624467	0.645594	0.664633	0.627713	0.676073	0.528435	0.545105	0.512308	0.508999	0.460615	0.568094	0.560903	0.595267	0.530764	0.477962	0.50533	0.760708	0.665645	0.686228	0.746552	0.528921	0.581936	0.538032	0.578014	0.558451	0.498495	0.612696	0.620568	0.554317	0.783172	0.789109		0.514167	0.203887	0.173962	0.173962	0.32031	0.21315	0.240119	0.233313				0.324717	0.29044
0.543601	0.480242	0.643207	0.507133	0.56444	0.605307	0.720789	0.604424	0.638879	0.582032	0.510694	0.625032	0.64091	0.611909	0.57484	0.667821	0.613762	0.5286	0.478312	0.663265	0.684907	0.646058	0.624611	0.706199	0.592847	0.558352	0.50922	0.651568	0.623044	0.657444	0.646658	0.614946	0.556737	0.782883	0.719192		0.420663	0.218548	0.184493	0.184493	0.223224	0.320213	0.162891	0.232726				0.208837	0.345002
0.520198	0.487029	0.577856	0.457703	0.718321	0.578016	0.693278	0.696858	0.560066	0.532662	0.700559	0.604441	0.396165	0.379799	0.542224	0.497648	0.690457	0.473429	0.532274	0.719947	0.616476	0.660879	0.635075	0.730094		0.57947	0.588649	0.670298	0.634791	0.550769	0.719038	0.662134		0.685008	0.715616		0.400498	0.21291	0.195648	0.195648	0.230449	0.296412	0.21197	0.210158					0.303426
0.508071	0.385097	0.591679	0.445969	0.549142	0.634501	0.68774	0.60945	0.598898	0.549242	0.583164	0.663814	0.424528	0.474908	0.596212	0.529465	0.685576	0.528807	0.443478	0.660896	0.629603	0.626482	0.569557	0.662893		0.677511	0.497666	0.766941	0.676352					0.719654	0.715292		0.360775	0.172478	0.179381	0.179381	0.21079	0.346902	0.214987	0.195744					0.298843
0.552089	0.334205	0.493202	0.439541	0.608716	0.533397	0.720188	0.549077	0.709491	0.496622	0.549078	0.5441	0.607915	0.583593	0.622761	0.57818	0.708145	0.502802	0.455577	0.672429	0.623159	0.716863	0.661941	0.748359													0.264692	0.200747	0.167504	0.167504	0.229599	0.263719	0.17831	0.220675					0.29814
0.353383	0.532193	0.580107	0.470844	0.630242	0.566921	0.642068	0.560729	0.628809	0.513668	0.589503	0.65775	0.459823	0.508042	0.693397	0.675676	0.611774	0.525249	0.482259	0.606182	0.653712	0.755576	0.527254	0.710387														0.170468	0.216383	0.216383	0.275989	0.202431	0.249299	0.212992					0.254551
0.384473	0.44591	0.557278	0.51103	0.578646	0.526517	0.708617	0.688669	0.717206	0.631171	0.574456	0.556813	0.798115	0.60705	0.627443	0.657072	0.578312	0.48463	0.483316	0.779513	0.602329	0.718696	0.636444	0.782055																	0.242788	0.309449	0.329759	0.250378					0.293557
0.470033	0.53147	0.557745	0.487294	0.646966	0.505563	0.673538	0.640887	0.628486	0.646388	0.66911	0.699393	0.445964	0.630022	0.682149	0.60356	0.57614	0.44815	0.415385	0.626403	0.627162	0.742318	0.700166	0.714449																	0.225114	0.359004	0.298039	0.274872					0.322079
0.43625	0.426521	0.653939	0.472049	0.670626	0.478999	0.672458	0.636043	0.540979	0.49032	0.607544	0.690259	0.562959	0.550648	0.70028	0.454305	0.615414	0.534931	0.380787	0.591523	0.606798	0.735647	0.633775	0.778479																	0.259068	0.256734	0.283065	0.201741					0.352414
0.469804	0.566972	0.510512	0.52852	0.782478	0.512125	0.680022	0.642194	0.653763	0.552624	0.642017	0.599064	0.484072	0.58439	0.540673	0.632295	0.610118	0.547051	0.402338	0.512553	0.632116	0.647687	0.695501	0.759328																	0.246367	0.223531	0.273013	0.216503					0.336122
0.512981	0.769023	0.649699	0.517666	0.629918	0.453162	0.670006	0.582503	0.604569	0.649399	0.678862	0.567186	0.766665	0.609521	0.606259	0.620552	0.654825	0.590734	0.481727	0.647235	0.630176	0.798719	0.642341	0.666573																	0.260457		0.323679	0.187294

## Sheet: Fig Supp 2 - VPC comp 
Figure 2 - Figure suppelement 1 G-M
D										VS	C											D										VS	All Terminal (A',B',C',E',F')
0.85179	1.06994	0.613634	0.913911	1.35774	1.09946	0.908722	1.78758	0.613634	0.465165		0.848053	1.16422	0.755033	0.711574	0.798142	1.2862	0.744982	0.546327	0.271094	0.584799		0.85179	1.06994	0.613634	0.913911	1.35774	1.09946	0.908722	1.78758	0.613634	0.465165		0.881937		0.642841	0.572853	0.975399	0.844068	0.808375	1.06126	1.10638	0.54186	0.666232	1.14829	0.659423	0.984419	0.768204	0.591468	1.00432
0.704321	0.58141	0.2603	0.53567	0.299683	0.621974	0.397117	0.25469	0.2603	0.17401		0.606088	0.703149	0.43891	0.593477	0.361919	0.52562	0.500307	0.353581	0.130005	0.462543		0.704321	0.58141	0.2603	0.53567	0.299683	0.621974	0.397117	0.25469	0.2603	0.17401		0.620217		0.512372	0.361742	0.408599	0.734511	0.588841	0.530025	0.851156	0.544569	0.588586	0.799358	0.48577	1.03155	0.73764	0.597521	0.768361
0.406621	0.392226	0.171676	0.291594	0.299694	0.232596	0.198383	0.137393	0.171676	0.182582		0.38023	0.368198	0.29879	0.352664	0.220453	0.231208	0.264334	0.158535	0.119646	0.3734		0.406621	0.392226	0.171676	0.291594	0.299694	0.232596	0.198383	0.137393	0.171676	0.182582				0.3726	0.179897	0.188463	0.389705	0.308241	0.504141	0.411212	0.209002	0.264563	0.305938	0.174601	0.464856	0.245725	0.215366	0.708168
0.180357	0.346598	0.149877	0.237028	0.185409	0.136381	0.106833	0.153939	0.149877	0.21528		0.235616	0.236178	0.315884	0.235638	0.151055	0.18694	0.166383	0.119838	0.133458	0.262738		0.180357	0.346598	0.149877	0.237028	0.185409	0.136381	0.106833	0.153939	0.149877	0.21528				0.306552	0.140525	0.190637	0.266977	0.192374	0.295924	0.258532	0.212325	0.148402	0.291007	0.135313	0.253925	0.235159	0.200866	0.411736
0.19248	0.271076	0.116631	0.161164	0.149542	0.133089	0.0997433	0.127299	0.116631	0.316301		0.195295	0.218918	0.219036	0.223272	0.168294	0.144418	0.136971		0.0949556	0.179908		0.19248	0.271076	0.116631	0.161164	0.149542	0.133089	0.0997433	0.127299	0.116631	0.316301				0.25039	0.163534	0.164627	0.244726	0.218452	0.19512	0.201969	0.175355	0.140755	0.213542	0.126978	0.18385	0.136827	0.21095	0.244311
0.133233	0.237046	0.12132	0.1196	0.145449	0.111501	0.111285	0.120705	0.12132	0.275422		0.125041	0.275689	0.237864	0.251241	0.16317	0.150623	0.113939		0.126815	0.233958		0.133233	0.237046	0.12132	0.1196	0.145449	0.111501	0.111285	0.120705	0.12132	0.275422				0.206981	0.161937	0.15046	0.170683	0.137833	0.195084	0.163923	0.175855	0.215719	0.275496	0.15901	0.173668	0.151636	0.141532	0.281139
0.148115	0.301185	0.110415	0.132487	0.158079	0.15694	0.117192	0.13527	0.110415			0.155655	0.205217	0.29968	0.185495	0.142396	0.167995	0.21028	0.139959	0.151669	0.32136		0.148115	0.301185	0.110415	0.132487	0.158079	0.15694	0.117192	0.13527	0.110415					0.251829	0.172122	0.167949	0.282918	0.224555	0.259638	0.169275	0.150756	0.176653	0.220409	0.15923	0.149198	0.142619	0.135497	0.33404
0.193935	0.280612	0.125309	0.133123	0.174048	0.12145	0.101599	0.126566	0.125309			0.152607	0.267258	0.268008	0.125145	0.285907	0.144596	0.232243	0.142399	0.111143			0.193935	0.280612	0.125309	0.133123	0.174048	0.12145	0.101599	0.126566	0.125309					0.23945	0.132334	0.172318	0.230256	0.18936	0.209109	0.224025	0.18472	0.143527	0.189985	0.176654	0.184506	0.126054	0.155212	0.222668
0.107091	0.246062	0.137654	0.151055	0.151766	0.120189	0.165265	0.0857318	0.137654			0.13302	0.298846	0.411829	0.19681	0.3346	0.158412	0.210469	0.191616	0.179851			0.107091	0.246062	0.137654	0.151055	0.151766	0.120189	0.165265	0.0857318	0.137654					0.297611	0.12436	0.190924	0.223033	0.209008	0.241913	0.158367	0.164907	0.17124	0.184438	0.180858	0.121797	0.103374	0.161564	0.227498
0.124124	0.123464	0.139307	0.132299	0.193758	0.0871805	0.128981	0.143678	0.139307			0.160248	0.317584	0.41093	0.2808	0.595589	0.155918	0.240043	0.230333	0.211872			0.124124	0.123464	0.139307	0.132299	0.193758	0.0871805	0.128981	0.143678	0.139307					0.221944	0.120843	0.180139	0.1913	0.170838	0.163309	0.158227	0.237083	0.161143	0.217985	0.163568	0.139219	0.0881908	0.122442	0.210988
0.123062	0.142719	0.118885	0.198696	0.100704	0.129846	0.104253	0.091571	0.118885			0.196564	0.388532	0.428901	0.263885	0.422246	0.266818	0.186568	0.307776	0.169259			0.123062	0.142719	0.118885	0.198696	0.100704	0.129846	0.104253	0.091571	0.118885					0.194975	0.133411	0.158865	0.14838	0.160066	0.165427	0.129749	0.169068	0.158798	0.204172	0.165924	0.186391	0.166454	0.149882	0.215943
0.156305	0.180435	0.0969784	0.162127	0.159728	0.117504	0.0817024	0.0901288	0.0969784			0.241479	0.4271	0.375494	0.321068	0.612055	0.21881	0.140179		0.265121			0.156305	0.180435	0.0969784	0.162127	0.159728	0.117504	0.0817024	0.0901288	0.0969784					0.218867	0.122289	0.147982	0.182938	0.246901	0.176583	0.156241	0.186888	0.176504	0.189289	0.124556			0.10855	0.216863
0.153463	0.14199	0.12959	0.168814	0.187924	0.122414	0.1205	0.154269	0.12959			0.341148	0.46651	0.525719	0.27711	0.507637	0.228091	0.19081		0.195775			0.153463	0.14199	0.12959	0.168814	0.187924	0.122414	0.1205	0.154269	0.12959					0.190514	0.178537	0.140678	0.167912	0.150758			0.248147	0.214731	0.241211	0.207692
0.122745	0.126551	0.103726	0.136574	0.092273	0.0940106	0.110287	0.0767309	0.103726			0.342246	0.402185	0.41043	0.310691	0.537647	0.274683	0.213966					0.122745	0.126551	0.103726	0.136574	0.092273	0.0940106	0.110287	0.0767309	0.103726					0.184662	0.153215	0.144946	0.196945	0.23148
0.124355	0.143781		0.147303	0.11351	0.119892	0.078534	0.105683				0.457792	0.410253	0.450677	0.349826	0.345041	0.293839	0.240444					0.124355	0.143781		0.147303	0.11351	0.119892	0.078534	0.105683						0.243759	0.18181	0.177643
0.124724	0.156691		0.157188	0.10461	0.129738	0.0878494	0.112429				0.492501	0.379169	0.399753	0.433285	0.448531	0.367262	0.226357					0.124724	0.156691		0.157188	0.10461	0.129738	0.0878494	0.112429						0.196604
0.124622	0.195211		0.144817	0.116797	0.165178	0.0865798	0.0807968				0.392229	0.483183	0.398921	0.311761	0.399211	0.356205	0.296936					0.124622	0.195211		0.144817	0.116797	0.165178	0.0865798	0.0807968
0.112473	0.195211			0.125701	0.150291	0.0929039	0.112792				0.349586	0.369897	0.363636		0.4464	0.471604	0.191118					0.112473	0.195211			0.125701	0.150291	0.0929039	0.112792
0.11062	0.145439			0.119403	0.224744	0.0853764	0.110864				0.2656	0.366677	0.457387			0.562396	0.247779					0.11062	0.145439			0.119403	0.224744	0.0853764	0.110864
0.109027	0.212674			0.100266	0.15562	0.0764972					0.289361	0.351358	0.414254			0.529015	0.210952					0.109027	0.212674			0.100266	0.15562	0.0764972
0.118798	0.262812			0.108095	0.0975084						0.350014	0.413053	0.445644			0.54376						0.118798	0.262812			0.108095	0.0975084
0.164513	0.142188			0.163835	0.19551						0.480958	0.448806	0.376622			0.509166						0.164513	0.142188			0.163835	0.19551
0.140247	0.119151			0.0885158	0.211487						0.558618	0.291327	0.427894			0.640283						0.140247	0.119151			0.0885158	0.211487
0.127993	0.167996				0.0901552						0.299535	0.429315				0.595616						0.127993	0.167996				0.0901552
[truncated: 298 more columns]
