# Supplementary material for: Visualizing the metazoan proliferation-quiescence decision in vivo
Source: eLife. 2020 Dec 22;9:e63265. doi: 10.7554/eLife.63265 (PMC7880687; doi:10.7554/eLife.63265)
Supplement: Figure 3—source data 1. — Raw data of DHB ratios used to generate Figure 3C in Microsoft Excel format. [file elife-63265-fig3-data1.xlsx]

## Sheet: Figure 3
Figure 3
	C	VPC 3-6
	Time (min)	Cell 1	Cell 2	Cell 3	Cell 4	Cell 5	Cell 6	Cell 7	Cell 8	Cell 9	Cell 10	Cell 11	Cell 12	Cell 13	Cell 14	Cell 15	Cell 16	Cell 17	Cell 18	Cell 19	Cell 20	Cell 21	Cell 22	Cell 23	Cell 24	Cell 25	Cell 26	Cell 27	Cell 28	Cell 29	Cell 30	Cell 31	Cell 32	Cell 33	Cell 34	Cell 35	Cell 40	Cell 41	Cell 42	Cell 43	Cell 44	Cell 45	Cell 46	Cell 47	Cell 48	Cell 49	Cell 50	Cell 51	Cell 52
	-75																		0.572266												0.666593				0.912968
	-70									0.805275									0.489305												0.803615				1.26984
	-65						0.955473			1.06436									0.547503												0.829695				1.06747
	-60					0.846444	0.859549			1.1441									0.643154				0.938317								1.07072				1.05635
	-55					1.01018	0.975284			1.19444					0.815006				0.744854				0.841289		0.59569						0.649717				1.32744
	-50	1.16954				1.11109	0.934327			1.15629					1.17298				0.91158				0.786076		0.506672						1.09416				1.72393
	-45	1.07426				0.995463	1.00908			1.33917		0.945228		0.842637	1.15824				1.10861				0.895345		0.618029		1.56302		1.02436		0.825113				0.463822
	-40	1.0996				0.763149	1.09766			1.4044		1.18856		1.07667	1.22172				1.09527				0.882245		0.549369		1.5351		1.33702		0.722348				0.877212
	-35	1.19712		0.993854		0.700816	1.27506			1.39261		1.34759		1.03792	1.03812		1.18732		0.937239				1.24403		0.880718		1.35234		1.01836		0.873871				0.670373
	-30	1.20425		1.32923		0.924656	0.990553		0.795704	1.45179		1.4777		0.927301	1.04624		1.22277		1.11285				0.967589		0.872357		1.20493		1.34816		0.909768		0.837622		0.730254
	-25	1.43389		1.46996		0.855159	0.937787		0.873118	1.52174		1.38479		0.954555	1.15969		1.25755		1.10741				1.13576		0.797121		1.30868		0.975047		0.953946		1.00762		0.661136
	-20	1.07705		1.71974		0.881879	1.06874		0.911553	1.50002		1.72508		1.41073	1.13822		1.21425		1.2489				0.967932		0.33948		1.58007		1.70952		0.550145		0.977106		0.61003
	-15	0.894866		1.50285		1.06507	1.24555		1.16326	1.44477		1.27732		1.10645	0.950904		1.12102		1.30022				0.946353		0.693535		1.48061		1.43284		0.617798		1.15996		0.468068
	-10	0.592257		1.01029		0.541341	0.361694		0.960711	0.621361		0.475612		0.582919	0.644276		0.599294		1.38129				0.52039		0.390852		0.592803		0.665866		0.43975		0.494142		0.54497
	-5	0.717265		0.53219		0.711949	0.64749		0.741469	0.77572		0.886149		0.721539	0.691229		0.737572		0.657522		0.970196		0.391035		0.483278		0.815553		0.460478		0.516874		0.82743		0.445092														0.238463
	0	0.761312	0.842703	0.823882	0.721421	0.622163	0.569657	0.702737		0.808109	0.746697	0.74355	0.858204	0.811784	0.71845	0.693085	0.836443	0.712562	0.809902	0.685424	0.962957	1.08394	0.65186	0.326916	0.320507	1.35045	0.654014	0.631666	0.705511	0.599879	1.09196	1.14944	0.934085	0.567432	0.573977	0.921851													0.240573
	5	0.58648	0.614059	0.478192	0.50092	0.497721	0.485792	0.548972	0.78008	0.506251	0.412737	0.519485	0.608211	0.559516	0.431424	0.537077	0.717231	0.765286	0.727885	0.538939	0.629787	0.675518	0.698857	0.551206	0.543573	0.285081	0.643262	0.57642	0.630886	0.486728	0.413627	0.481444	0.568278	0.66433	0.534655	0.523979													0.246051
	10	0.548203	0.475826	0.377113	0.466311	0.453508	0.316208	0.53598	0.635866	0.507984	0.434395	0.540366	0.533026	0.390959	0.38966	0.419857	0.604525	0.593578	0.596929	0.654596	0.58431	0.566554	0.40088	0.297905	0.478191	0.3751	0.430831	0.290115	0.440588	0.479268			0.478831	0.394522	0.456419	0.531148													0.323862
	15	0.506273	0.507574	0.400738	0.499926	0.341171	0.294165	0.332836	0.67275	0.527522	0.396816	0.418082	0.589757	0.668254	0.401322	0.396081	0.553252	0.481041	0.52736	0.600986	0.597353	0.626577	0.461235	0.298599	0.288739	0.354732	0.27857	0.380227	0.448894	0.696833			0.517	0.511083	0.442025	0.510482													0.307828
	20	0.451455	0.424508	0.450643	0.405775	0.321538	0.27818	0.318269	0.67522	0.358225	0.456432	0.49738	0.664484	0.630495	0.30977	0.370913	0.576863	0.63794	0.642484	0.588044	0.591138	0.571438	0.250393	0.273752	0.421171	0.428285	0.296095	0.376238	0.322309	0.672015			0.484752	0.446178	0.618059	0.407088													0.283204
	25	0.485303	0.469634	0.469913	0.337819	0.209103	0.265938	0.311453	0.536601	0.414754	0.47591	0.403353	0.554807	0.740834	0.294612	0.402411	0.528244	0.479283	0.528062	0.546826	0.540462	0.459619	0.310873	0.449803	0.41218	0.443627	0.243246	0.227258	0.29959	0.426888			0.38888	0.381345	0.643534	0.408124													0.28939
	30	0.502778	0.448594	0.475524	0.293591	0.384285	0.264234	0.298784	0.600621	0.455161	0.503929	0.548648	0.59119	0.727874	0.219099	0.34503	0.462001	0.588439	0.56468	0.586604	0.560183	0.627303	0.274494	0.38424	0.318348	0.532537	0.259428	0.366879	0.452189	0.458596			0.522675	0.293991	0.448881	0.635681													0.254338
	35	0.446619	0.399586	0.378683	0.385711	0.296529	0.231345	0.320699		0.413213	0.37426	0.360523	0.494415	0.751525	0.277043	0.419377	0.478917	0.517918	0.591166	0.586083	0.53795	0.468168	0.337766	0.308753	0.499739	0.271759	0.475905	0.472743	0.480698	0.376129			0.335558	0.298841	0.508095	0.444561													0.256919
	40	0.475557	0.393409	0.396575	0.289313	0.290853	0.198103	0.285224	0.719852	0.475721	0.313493	0.564672	0.573426	0.568836	0.403812	0.642187	0.409306	0.540577	0.595805	0.500404	0.499566	0.544858	0.374457	0.198574	0.478026	0.254496	0.332571	0.38832	0.283286	0.503991					0.558453	0.575027			0.303672										0.279852
	45	0.487151	0.478806	0.378815	0.331997	0.297518	0.212213	0.362928	0.55159	0.412396	0.278032	0.552381	0.538815	0.701766	0.359852	0.501963	0.399587	0.610853	0.489851	0.449055	0.580643	0.437381	0.315137	0.370089	0.339517	0.286298	0.279348	0.34833	0.518321	0.324183				0.283545	0.702575	0.499409	0.505936		0.41433										0.233832
	50	0.485104	0.422512	0.41593	0.308362	0.253401	0.250231	0.304037	0.680833	0.342502	0.408752	0.612481	0.49536	0.621004	0.360367	0.490424	0.446649	0.477755	0.495886	0.430568	0.642765	0.471913	0.282521	0.348528	0.230384	0.373659	0.338434	0.265258	0.41823	0.423076				0.242133	0.598647	0.671174	0.423982		0.343129										0.280895
	55	0.40391	0.417682	0.428485	0.250097	0.325516	0.17556	0.397339	0.661214	0.469469	0.349395	0.488886	0.494883	0.573339	0.256648	0.369754	0.438405	0.553048	0.46061	0.384443	0.617792	0.523388	0.356142	0.316597	0.159967	0.348515	0.295127	0.380649	0.484903	0.305427				0.270913	0.665774	0.720741	0.474397		0.405904										0.262946
	60	0.384749	0.507426	0.394443	0.348469	0.243692	0.199877	0.336408	0.583887	0.416588	0.365274	0.494977	0.484811	0.513882	0.210996	0.414621	0.473148	0.455847	0.523071	0.548592	0.679864	0.594763	0.296857	0.403074	0.187441	0.427537	0.282842	0.438073	0.516932	0.480285				0.232523	0.778693	0.51879	0.409181		0.368626										0.235077
	65	0.44287	0.452269	0.403336	0.30313	0.293372	0.207246	0.463011	0.638193	0.333304	0.2849	0.470647	0.429401	0.313967	0.330932	0.540496	0.480543	0.37267	0.553272	0.448223	0.513696	0.598858	0.393021	0.407094	0.332427	0.481929	0.293902	0.298615	0.330558	0.505971				0.219351	0.850029	0.587409	0.435723		0.346989										0.275905
	70	0.458726	0.373843	0.392712	0.259725	0.383718	0.229526	0.483513	0.662948	0.318988	0.31617	0.510509	0.344934	0.333138	0.384038	0.518332	0.403195	0.357531	0.54728		0.647926	0.670051	0.315279	0.411654	0.336903	0.445198	0.392736	0.23413	0.422921	0.368389				0.287239		0.602152	0.447427		0.361936										0.304515
	75	0.419518	0.331406	0.392099	0.311877	0.300232	0.225191	0.373559	0.666034	0.302506	0.378045	0.581489	0.381608	0.362466	0.454174	0.526868	0.616926	0.480354			0.495817	0.545998	0.342076	0.294384	0.376557	0.351854	0.456877	0.45696	0.419205	0.321859				0.312536		0.647185	0.498343		0.347163										0.277575
	80	0.459789	0.357726	0.518912	0.283439	0.226976	0.234018	0.238162	0.478014	0.278101	0.482006	0.480631	0.446919	0.336654	0.495191	0.403342	0.306473	0.363132			0.636586	0.723716	0.357894	0.49546	0.356894	0.391593	0.362491	0.417033	0.489533	0.390769				0.349975		0.694149	0.358612		0.424303										0.249248
	85	0.471662	0.344915	0.399376	0.274583	0.427475	0.236849	0.238813	0.472598	0.372629	0.430348	0.519277	0.442033	0.331409	0.451301	0.389839	0.243368	0.393599			0.507787	0.526917	0.379594	0.405082	0.379643	0.425866	0.303773	0.716346	0.425196	0.385516				0.313927		0.690256	0.38221		0.383649										0.204816
	90	0.463621	0.357433	0.45629	0.348527	0.235825	0.207722	0.314379	0.550117	0.288618	0.547025	0.537378	0.610082	0.339219	0.379861	0.350446	0.579699	0.437006			0.559386	0.525419	0.350824	0.478887	0.427699	0.491475	0.332177	0.874834	0.382619	0.36124						0.609659	0.432821		0.327518										0.289593
	95	0.435763	0.44943	0.240069	0.360838	0.233488	0.185842	0.305694	0.634386	0.383668	0.514963	0.769133	0.570425	0.385195	0.392153	0.392083	0.705023	0.361577			0.769106	0.781749	0.400552	0.39678	0.53937	0.641027	0.257893	0.393014	0.394113	0.714691						0.742352	0.391862		0.357844										0.232808
	100	0.384696	0.421204	0.348668	0.36334	0.224208	0.170677	0.308927	0.696545	0.335947	0.530207	0.684479	0.673496	0.363066	0.308374	0.313478	0.554457	0.551051			0.715564	0.750424	0.238934	0.350879	0.448736	0.710563	0.562457	0.614842	0.630784	0.569015						0.748481	0.370199		0.420378										0.245802
	105	0.506338	0.414382	0.281533	0.360804	0.277988	0.236432	0.281783	0.62099	0.444183	0.718552	1.00787	0.710743	0.507745	0.466134	0.356934	0.722696	0.512665			0.728598	0.974851	0.357611	0.490338	0.559388	0.754126	0.647498	1.04586	0.625533	0.482604							0.312688		0.313448		0.203431								0.287953
	110	0.455694	0.392192	0.301508	0.405192	0.269541	0.240276	0.265758	0.628307	0.466462	0.725498		0.702318	0.425389	0.540274	0.421294	0.497888	0.66972			0.769011	0.528607	0.43872	0.347084	0.491137	1.25507	0.789777	1.01767	0.998478	0.850336							0.412791		0.347344		0.306534		0.29356						0.221329
	115	0.504778	0.415856	0.295698	0.403309	0.28949	0.204439	0.335973	0.484169				0.799693	0.641393	0.636694	0.436861	0.58537	0.664924			0.64115	0.842115	0.32468	0.437829	0.663655		0.640103	1.01376	0.796969	0.547917							0.442642		0.352332		0.231566		0.309634						0.307552
	120	0.40388	0.381925	0.426393	0.3048	0.230877	0.360206	0.18629	0.659763				0.809275	0.717506	0.731481	0.397748	0.6511	0.516073			0.806785	0.822265	0.369655	0.411297	0.527264		1.17591	1.30139	1.18783	0.670682							0.33228		0.38795		0.355987		0.271875						0.329522
	125	0.438006	0.523222	0.423652	0.445021	0.257461	0.233576	0.321239	0.582827				0.758719	1.15192	0.553558	0.57132	0.835342	0.589124			0.837058	1.04521	0.330595	0.232635	0.821074		0.728356	1.17177	0.898594	0.901134							0.421879		0.40879		0.352247		0.247825		0.216919			0.442881	0.303888
	130	0.454142	0.506035	0.430829	0.376725	0.293325	0.208687	0.36428	0.734912				0.985676	0.992886							0.883848	1.00403	0.43717	0.2605			1.26352	1.35122	0.838704	0.744023							0.407322		0.383071		0.370758		0.263359		0.236912			0.516358	0.38678
	135	0.432952	0.459597	0.427773	0.309345	0.239091	0.217874	0.411556	0.729375				0.810621	0.906359							0.813382	1.03786	0.563676	0.314701			0.708317	0.996228	0.799036	1.04135							0.34474		0.486854		0.384202		0.278843		0.317716			0.540194	0.419455
	140	0.463799	0.450821	0.436035	0.38922	0.266455	0.281573	0.418869	0.718421												0.839898	1.13344	0.329465	0.347548													0.399049		0.475442		0.358159		0.328723		0.354458			0.442209	0.346017
	145	0.419562	0.489595	0.438811	0.224349	0.293385	0.396031	0.195875	0.826432												1.07276	1.02234	0.513227	0.283038													0.421053		0.446218		0.34969		0.340404		0.267615			0.322621	0.380536
	150	0.460792	0.529799	0.41168	0.436727	0.342328	0.260138	0.203372	0.651138												1.11969	1.06476	0.574625	0.251144													0.609687		0.450909		0.399694		0.355438		0.598483			0.400774	0.338647
	155	0.48023	0.620036	0.375899	0.42201	0.257121	0.205568	0.238006													0.817723	0.902107	0.581625	0.424188													0.437085		0.50956		0.324894		0.425216		0.268923			0.515623	0.428293
	160	0.451722	0.601081	0.444758	0.444583	0.32864	0.213175	0.368686													0.905697	1.2866	0.623952	0.566013													0.494537		0.453175		0.356395		0.294779		0.364658			0.866564	0.434738
	165	0.429078	0.556203	0.498271	0.395059	0.233943	0.318036	0.414955													0.688497	1.16045	0.590567	0.404081													0.432394		0.54441		0.37502		0.199463		0.293489			0.508978	0.635724
	170	0.442099	0.534154	0.482124	0.423838	0.2428	0.253446	0.371304													0.703173	1.14839	0.418504	0.4026													0.544099		0.6122		0.436381		0.367397		0.683341			0.616101	0.735151
	175	0.471676	0.488236	0.412113	0.470134	0.279839	0.320958	0.490998															0.482057	0.39975													0.737893		0.745398		0.454002		0.539572		0.543857			0.863254	0.603738
	180	0.481289	0.533373	0.496852	0.46314	0.370554																	0.524337	0.697866													0.795406		0.81587		0.493938		0.681245		0.512071			0.625393	0.478411
	185	0.508645	0.7356	0.550009	0.52682																																0.744229		0.653487		0.7478		0.611345		0.741855			0.514198	0.477372
	190	0.464331	0.86895	0.48778	0.635935																																0.816588		0.590729		0.669346		0.603194		0.525211			0.425405	0.649495
	195			0.526853	0.62797																																0.861806		0.570454		0.6592		0.609969		0.412813			0.632745	0.508692
	200			0.580893	0.532393																																0.765292		0.633721		0.668393		0.582942		0.618092			0.58069	0.723184
	205			0.533254	0.287719																																0.65237		0.696925		0.631965		0.566951		0.597795			0.901419	0.642001
	210																																				0.792776		0.595791		0.733179		0.663392		0.708444			0.883078	0.726946
	215																																				0.815428		0.62204		0.516433		1.0389		0.809278			0.917766	0.611986
	220																																				0.857878		0.689147		0.846527		1.1451		0.685507			0.926254	0.624675
	225																																				0.968648		0.846002		1.03798		1.10342		0.72204			0.888873	0.704101
	230																																				0.905347		0.453742		0.367245		0.860673		0.541265			0.64368	1.09752
	235																																				0.601235		0.192987		0.44625		0.51215		0.398252			0.452036	0.469729
	240																																				0.760803		0.680212		0.543282		1.16945		0.612166			0.71594
	245																																				0.985347	0.82776	1.03008	0.912128	1.32937	1.14876	0.982829	1.17164	0.767802	0.641618	1.07534	0.614249
	250																																				0.88882	0.760947	0.766388	0.665685	0.583398	0.569558	0.49763	0.430089	0.592561	0.501685	0.881249	0.460597
	255																																				0.373038	0.750796	0.569579	0.654027	0.541334	0.226964	0.476756	0.652103	0.405677	0.268031	0.53592	0.457904
	260																																				0.427337	0.552064	0.43635	0.439932	0.293881	0.272926	0.424075	0.236405	0.202676	0.177434	0.361805	0.175364
	265																																				0.208813	0.367303	0.294454	0.382169	0.159605	0.153812	0.275471	0.22965	0.173532	0.235984	0.193098	0.215271
	270																																				0.21022	0.351705	0.0895465	0.434385	0.187365	0.112149	0.22565	0.190517	0.171172	0.201051	0.230585	0.138971
	275																																				0.220035	0.306794	0.237478	0.296192	0.21972	0.242071	0.213748	0.130223	0.167476	0.222779	0.154429	0.154861
	280																																				0.215453	0.297443	0.250781	0.309537	0.209415	0.116216	0.225503	0.226656	0.132063	0.211748	0.122514	0.165321
	285																																				0.212612	0.331348			0.144594	0.188088	0.210692	0.136793	0.128874	0.169671	0.223175	0.1694
	290																																								0.109272	0.163966	0.155513	0.135905	0.16274	0.234633	0.154943	0.146104
	295																																								0.150834	0.14229	0.289978	0.207022	0.145335	0.235707	0.223872	0.142694
	300																																								0.145035	0.18143	0.432659	0.123264	0.222418	0.259677	0.13754	0.143113
	305																																								0.155452	0.24478	0.267556	0.252738
	310																																								0.247284	0.334118	0.393306	0.184571
	315																																								0.17164	0.229902	0.204142	0.150461
	320																																								0.184131	0.347545	0.22278	0.16078
	325																																								0.180154	0.368443	0.322096	0.154511
	330																																								0.333876	0.310385	0.160966	0.288485
	335																																								0.275997	0.178123	0.380192	0.158635
	340																																								0.237663	0.43589	0.205844	0.180305
	345																																								0.314463	0.347446	0.248863	0.322509
	350																																										0.333319	0.161875
	355
	360
	365
	370
	375
	380
	385
	390
	395
	400
	405
	410
	415
	420
	425
	430
	435
	440
	445
	450
	455
	460
	465
	470
	475
	480
	485
	490
	495
	500
	505
	510
	515
	520
	525
	530
	535
	540
	545
	550
	555
	560
	565
	570
	575
	580
	585
	590
	595
	600
	605
	610
	615
	620
	625
	630
	635
	640
	645
	650
	655
	660
	665
	670
	675
	680
	685
	690
	695
	700
	705
	710
	715
	720
	725
	730
	735
	740
	745
	750
	755
	760
	765
	770
	775
	780
	785
	790
	795
	800
	805
	810
	815
	820
	825
	830
	835
	840
	845
	850
	855
	860
	865
	870
	875
	880
	885
	890
	895
	900
	905
[truncated: 140 more columns]
