# Supplementary material for: Visualizing the metazoan proliferation-quiescence decision in vivo
Source: eLife. 2020 Dec 22;9:e63265. doi: 10.7554/eLife.63265 (PMC7880687; doi:10.7554/eLife.63265)
Supplement: Figure 3—source data 2. — Raw data of DHB ratios used to generate Figure 3—figure supplement 1A–G in Microsoft Excel format. [file elife-63265-fig3-data2.xlsx]

## Sheet: Fig Supp 3 - VPC comp 
Figure 3 - Figure supplement 1 A-G
D										VS	C											D										VS	All Terminal (A',B',C',E',F')
0.85179	1.06994	0.613634	0.913911	1.35774	1.09946	0.908722	1.78758	0.613634	0.465165		0.848053	1.16422	0.755033	0.711574	0.798142	1.2862	0.744982	0.546327	0.271094	0.584799		0.85179	1.06994	0.613634	0.913911	1.35774	1.09946	0.908722	1.78758	0.613634	0.465165		0.881937		0.642841	0.572853	0.975399	0.844068	0.808375	1.06126	1.10638	0.54186	0.666232	1.14829	0.659423	0.984419	0.768204	0.591468	1.00432
0.704321	0.58141	0.2603	0.53567	0.299683	0.621974	0.397117	0.25469	0.2603	0.17401		0.606088	0.703149	0.43891	0.593477	0.361919	0.52562	0.500307	0.353581	0.130005	0.462543		0.704321	0.58141	0.2603	0.53567	0.299683	0.621974	0.397117	0.25469	0.2603	0.17401		0.620217		0.512372	0.361742	0.408599	0.734511	0.588841	0.530025	0.851156	0.544569	0.588586	0.799358	0.48577	1.03155	0.73764	0.597521	0.768361
0.406621	0.392226	0.171676	0.291594	0.299694	0.232596	0.198383	0.137393	0.171676	0.182582		0.38023	0.368198	0.29879	0.352664	0.220453	0.231208	0.264334	0.158535	0.119646	0.3734		0.406621	0.392226	0.171676	0.291594	0.299694	0.232596	0.198383	0.137393	0.171676	0.182582				0.3726	0.179897	0.188463	0.389705	0.308241	0.504141	0.411212	0.209002	0.264563	0.305938	0.174601	0.464856	0.245725	0.215366	0.708168
0.180357	0.346598	0.149877	0.237028	0.185409	0.136381	0.106833	0.153939	0.149877	0.21528		0.235616	0.236178	0.315884	0.235638	0.151055	0.18694	0.166383	0.119838	0.133458	0.262738		0.180357	0.346598	0.149877	0.237028	0.185409	0.136381	0.106833	0.153939	0.149877	0.21528				0.306552	0.140525	0.190637	0.266977	0.192374	0.295924	0.258532	0.212325	0.148402	0.291007	0.135313	0.253925	0.235159	0.200866	0.411736
0.19248	0.271076	0.116631	0.161164	0.149542	0.133089	0.0997433	0.127299	0.116631	0.316301		0.195295	0.218918	0.219036	0.223272	0.168294	0.144418	0.136971		0.0949556	0.179908		0.19248	0.271076	0.116631	0.161164	0.149542	0.133089	0.0997433	0.127299	0.116631	0.316301				0.25039	0.163534	0.164627	0.244726	0.218452	0.19512	0.201969	0.175355	0.140755	0.213542	0.126978	0.18385	0.136827	0.21095	0.244311
0.133233	0.237046	0.12132	0.1196	0.145449	0.111501	0.111285	0.120705	0.12132	0.275422		0.125041	0.275689	0.237864	0.251241	0.16317	0.150623	0.113939		0.126815	0.233958		0.133233	0.237046	0.12132	0.1196	0.145449	0.111501	0.111285	0.120705	0.12132	0.275422				0.206981	0.161937	0.15046	0.170683	0.137833	0.195084	0.163923	0.175855	0.215719	0.275496	0.15901	0.173668	0.151636	0.141532	0.281139
0.148115	0.301185	0.110415	0.132487	0.158079	0.15694	0.117192	0.13527	0.110415			0.155655	0.205217	0.29968	0.185495	0.142396	0.167995	0.21028	0.139959	0.151669	0.32136		0.148115	0.301185	0.110415	0.132487	0.158079	0.15694	0.117192	0.13527	0.110415					0.251829	0.172122	0.167949	0.282918	0.224555	0.259638	0.169275	0.150756	0.176653	0.220409	0.15923	0.149198	0.142619	0.135497	0.33404
0.193935	0.280612	0.125309	0.133123	0.174048	0.12145	0.101599	0.126566	0.125309			0.152607	0.267258	0.268008	0.125145	0.285907	0.144596	0.232243	0.142399	0.111143			0.193935	0.280612	0.125309	0.133123	0.174048	0.12145	0.101599	0.126566	0.125309					0.23945	0.132334	0.172318	0.230256	0.18936	0.209109	0.224025	0.18472	0.143527	0.189985	0.176654	0.184506	0.126054	0.155212	0.222668
0.107091	0.246062	0.137654	0.151055	0.151766	0.120189	0.165265	0.0857318	0.137654			0.13302	0.298846	0.411829	0.19681	0.3346	0.158412	0.210469	0.191616	0.179851			0.107091	0.246062	0.137654	0.151055	0.151766	0.120189	0.165265	0.0857318	0.137654					0.297611	0.12436	0.190924	0.223033	0.209008	0.241913	0.158367	0.164907	0.17124	0.184438	0.180858	0.121797	0.103374	0.161564	0.227498
0.124124	0.123464	0.139307	0.132299	0.193758	0.0871805	0.128981	0.143678	0.139307			0.160248	0.317584	0.41093	0.2808	0.595589	0.155918	0.240043	0.230333	0.211872			0.124124	0.123464	0.139307	0.132299	0.193758	0.0871805	0.128981	0.143678	0.139307					0.221944	0.120843	0.180139	0.1913	0.170838	0.163309	0.158227	0.237083	0.161143	0.217985	0.163568	0.139219	0.0881908	0.122442	0.210988
0.123062	0.142719	0.118885	0.198696	0.100704	0.129846	0.104253	0.091571	0.118885			0.196564	0.388532	0.428901	0.263885	0.422246	0.266818	0.186568	0.307776	0.169259			0.123062	0.142719	0.118885	0.198696	0.100704	0.129846	0.104253	0.091571	0.118885					0.194975	0.133411	0.158865	0.14838	0.160066	0.165427	0.129749	0.169068	0.158798	0.204172	0.165924	0.186391	0.166454	0.149882	0.215943
0.156305	0.180435	0.0969784	0.162127	0.159728	0.117504	0.0817024	0.0901288	0.0969784			0.241479	0.4271	0.375494	0.321068	0.612055	0.21881	0.140179		0.265121			0.156305	0.180435	0.0969784	0.162127	0.159728	0.117504	0.0817024	0.0901288	0.0969784					0.218867	0.122289	0.147982	0.182938	0.246901	0.176583	0.156241	0.186888	0.176504	0.189289	0.124556			0.10855	0.216863
0.153463	0.14199	0.12959	0.168814	0.187924	0.122414	0.1205	0.154269	0.12959			0.341148	0.46651	0.525719	0.27711	0.507637	0.228091	0.19081		0.195775			0.153463	0.14199	0.12959	0.168814	0.187924	0.122414	0.1205	0.154269	0.12959					0.190514	0.178537	0.140678	0.167912	0.150758			0.248147	0.214731	0.241211	0.207692
0.122745	0.126551	0.103726	0.136574	0.092273	0.0940106	0.110287	0.0767309	0.103726			0.342246	0.402185	0.41043	0.310691	0.537647	0.274683	0.213966					0.122745	0.126551	0.103726	0.136574	0.092273	0.0940106	0.110287	0.0767309	0.103726					0.184662	0.153215	0.144946	0.196945	0.23148
0.124355	0.143781		0.147303	0.11351	0.119892	0.078534	0.105683				0.457792	0.410253	0.450677	0.349826	0.345041	0.293839	0.240444					0.124355	0.143781		0.147303	0.11351	0.119892	0.078534	0.105683						0.243759	0.18181	0.177643
0.124724	0.156691		0.157188	0.10461	0.129738	0.0878494	0.112429				0.492501	0.379169	0.399753	0.433285	0.448531	0.367262	0.226357					0.124724	0.156691		0.157188	0.10461	0.129738	0.0878494	0.112429						0.196604
0.124622	0.195211		0.144817	0.116797	0.165178	0.0865798	0.0807968				0.392229	0.483183	0.398921	0.311761	0.399211	0.356205	0.296936					0.124622	0.195211		0.144817	0.116797	0.165178	0.0865798	0.0807968
0.112473	0.195211			0.125701	0.150291	0.0929039	0.112792				0.349586	0.369897	0.363636		0.4464	0.471604	0.191118					0.112473	0.195211			0.125701	0.150291	0.0929039	0.112792
0.11062	0.145439			0.119403	0.224744	0.0853764	0.110864				0.2656	0.366677	0.457387			0.562396	0.247779					0.11062	0.145439			0.119403	0.224744	0.0853764	0.110864
0.109027	0.212674			0.100266	0.15562	0.0764972					0.289361	0.351358	0.414254			0.529015	0.210952					0.109027	0.212674			0.100266	0.15562	0.0764972
0.118798	0.262812			0.108095	0.0975084						0.350014	0.413053	0.445644			0.54376						0.118798	0.262812			0.108095	0.0975084
0.164513	0.142188			0.163835	0.19551						0.480958	0.448806	0.376622			0.509166						0.164513	0.142188			0.163835	0.19551
0.140247	0.119151			0.0885158	0.211487						0.558618	0.291327	0.427894			0.640283						0.140247	0.119151			0.0885158	0.211487
0.127993	0.167996				0.0901552						0.299535	0.429315				0.595616						0.127993	0.167996				0.0901552
[truncated: 298 more columns]
