# Supplementary material for: Visualizing the metazoan proliferation-quiescence decision in vivo
Source: eLife. 2020 Dec 22;9:e63265. doi: 10.7554/eLife.63265 (PMC7880687; doi:10.7554/eLife.63265)
Supplement: Figure 4—source data 1. — Raw data of DHB ratios and fluorescence intensity measurements of GFP::CKI-1 used to generate Figure 4B, and raw data used to generate Figure 4G–I in Microsoft Excel format. Data also corresponds to lineage specific data used to generate plots in Figure 4—figure supplement 1A–C. [file elife-63265-fig4-data1.xlsx]

## Sheet: Figure 4B 
Figure 4
	B	DHB Values All lineages minus D																															GFP::CKI-1 all lineages minus D
		A/B															E/F																A/B															E/F
		A						B				C					E								F								A						B				C					E
	Time				0.28														0.27	0.27	0.29															578.04
	1				0.32																															260.2
	2	0.35			0.34	0.35											0.35		0.35														527.78			369.59	351.94											419.56
	3	0.37	0.37		0.37	0.38											0.37		0.38														450.1	436.29		352.44	411.29											409.99
	4				0.39														0.41																	645.87
	5				0.43														0.43																	346.23
	6				0.44												0.44		0.45	0.46																374.8												447.76
	7				0.48												0.48		0.49																	206.62												502.48
	8	0.53																	0.51														396.19
	9	0.54			0.55	0.55	0.55																										676.38			728.3	442.98	427.3
	10
	11	0.57	0.57	0.57	0.58	0.58	0.59										0.59		0.57	0.58													446.77	699.43	567.88	510.84	817.77	332.61										725.66
	12	0.6	0.6	0.6	0.62												0.62		0.6	0.61	0.61	0.62	0.62	0.62									261.07	749.53	360.03	694.92												528.47
	13	0.64			0.64	0.65	0.65										0.65		0.63														579.62			654.97	300.32	603.82										298.31
	14	0.66	0.68		0.67	0.68											0.67	0.66															421.18	480.05		548.2	429.69											426.07	311.77
	15	0.69	0.71		0.69												0.69																326.32	300.97		515.35												663.21
	16	0.73	0.74	0.72	0.74	0.74																											330.55	421.32	127.13	681.69	206.65
	17																0.75	0.75																														575.53	523.92
	18	0.8			0.78	0.79																											485.15			292.54	521.22
	19	0.82			0.81	0.81	0.82												0.82	0.83													423.88			562.09	624.38	536.73
	20	0.87			0.85														0.84														485.42			311.51
	21
	22	0.93			0.92												0.92																458.12			541.44												693.57
	23	0.94			0.95																												580.65			482.61
	24
	25	0.97			0.97	0.99											0.98		0.98														317.41			407.09	192.4											564.13
	26				1.03												1	1.02	1.01	1.01	1.01															387.38												442.58	594.76
	27	1.05	1.05		1.04												1.04																378.71	655.89		463.89												597.28
	28	1.09			1.09														1.09	1.08													369.53			401.42
	29																		1.14	1.14
	30	1.16	1.17																														198.73	143.92
	31																1.19	1.2	1.19	1.21																												626	640.19
	32																1.23	1.23	1.24	1.25																												1101.15	662.64
	33	1.29																	1.3														573.82
	34	1.35	1.35		1.36	1.37											1.35																204.53	669.8		354.92	205.32											818.59
	35				1.4												1.41	1.42	1.39																	387.72												814.37	973.93
	36																1.43	1.45	1.44	1.45																												1014.15	601.43
	37				1.49														1.49	1.49																173.1
	38	1.51			1.52														1.54	1.55													771.33			441.6
	39				1.57														1.59																	562.96
	40																		1.61	1.61
	41																1.66	1.67																														908.83	1730.63
	42																		1.7
	43	1.75	1.75																														477.15	749.43
	44	1.81			1.82												1.8		1.8														374.63			275.6												1294.87
	45				1.84												1.82	1.84	1.85																	267.43												663.06	997.46
	46				1.87																															523.58
	47				1.92												1.91		1.9																	435.35												677.49
	48	1.93	1.94		1.93	1.93											1.93																167.79	4255.58		314.71	228.69											610.99
	49																1.96																															1483.4
	50																2.04		2	2.03																												762.4
	51																		2.1
	52				2.12												2.13																			460.92												765.71
	53	2.15			2.16																												229.44			273.42
	54
	55				2.24												2.26	2.28																		453.78												438.34	1869.81
	56				2.37												2.37		2.35																	440.8												1939.12
	57	2.44	2.49														2.44			2.41	2.43												627.01	1644.32														1368.19
	58				2.53																															283.5
	59				2.61	2.64													2.62	2.62																326.9	644.14
	60
	61
	62				2.81												2.85																			835.94												1398.82
	63				2.94																															1021.77
	64	3.1																	2.97	3													423.23
	65
	66	3.36																3.36															348.75																1534.22
	67																		3.5
	68																3.62																															1540.9
	69				3.99																															386.389
	70
	71
	72
	73
	74
	75
	76
	77																0.17	0.22							0.2	0.17																						1942.51	1680.69
	78											0.25	0.23	0.24	0.25										0.23	0.23	0.25		0.25														2312.54	931.24	750.56	1779.87
	79	0.28						0.28	0.27								0.28																523.3						536.43	371.28								2210.72
	80	0.31	0.3					0.31	0.31			0.31	0.32				0.3								0.29		0.31						421.73	625.69					502.35	505.84			1312.61	1301.79				1695.92
	81	0.34						0.34	0.34								0.32	0.32	0.33						0.32	0.32	0.33	0.33					372.11						571.5	728								980.4	816.29
	82	0.36						0.35				0.37					0.35	0.36							0.35								738.38						432.32				423.65					1545.36	808.21
	83	0.4	0.38					0.38	0.38	0.39	0.39						0.4	0.4	0.4						0.38	0.38	0.38	0.39	0.4				446.03	388.19					545.01	367.44	727.82	3984.91						1296.64	1175.62
	84	0.42	0.43					0.41	0.43			0.42	0.42												0.41	0.41	0.43	0.43					541.35	340.63					407.3	137.28			1344.18	1751.97
	85	0.44							0.44	0.44	0.44						0.44	0.44	0.45	0.46					0.44	0.44	0.44	0.45	0.45	0.46	0.47		461.83							666.26	655.57	358.78						1303.84	1180.28
	86	0.47	0.47	0.47	0.47	0.49		0.47	0.47	0.49		0.48					0.49	0.49	0.49						0.48	0.49	0.49						596.85	755.91	475.85	466.36	417.36		838.11	451.42	600.59		779.33					996.6	1173.19
	87	0.53	0.53	0.53	0.5	0.51		0.51	0.52	0.53							0.51	0.53	0.53	0.53	0.53	0.53			0.5	0.5	0.5	0.52	0.52	0.5			433.31	545.63	191.57	433.51	447.08		635.56	417.62	608.35							954.72	1179.26
	88	0.56	0.55	0.55	0.54		0.51	0.54	0.54	0.56	0.53						0.54	0.55	0.55	0.56	0.56				0.53	0.53	0.53	0.55	0.55				526.17	183.03	347.91	283.77		596.59	370.14	720.08	748.11	403.09						920.15	1337.6
	89	0.59	0.58	0.57	0.57			0.59									0.57	0.59							0.59								763.24	481.13	236.63	396.87			743.66									1110.16	1034.49
	90							0.6				0.6					0.6	0.61	0.61	0.62					0.6	0.61													608.86				807.31					1005.46	1078.01
	91	0.65	0.65	0.65	0.64	0.64		0.63									0.65	0.64	0.64														488.01	360.89	177.61	176.61	350.83		617.48									1040.43	723.22
	92	0.66	0.67	0.67				0.67	0.66			0.67					0.66	0.66	0.66	0.67	0.68				0.66	0.67							480.01	186.09	238.11				531.88	675.79			770.18					734.48	1054.69
	93	0.69	0.69	0.7	0.71	0.71		0.71									0.7	0.7	0.69	0.7					0.7	0.69	0.71						477.43	458.41	294.01	664.41	443.38		3738.53									726.31	1143.51
	94	0.74	0.73	0.72				0.73	0.73	0.73							0.73	0.74	0.73	0.74					0.73								424.84	685.16	462.02				988.83	4361.05	290.93							922.53	1077
	95	0.75						0.75	0.77	0.77		0.75					0.76	0.76							0.76								539.78						651.05	778.49	1371.55		537.38					1444.27	798.47
	96							0.78	0.78	0.78							0.78	0.78							0.8	0.8													2073.5	297.61	2456.36							1523.78	566.44
	97	0.82						0.81	0.82								0.81	0.82	0.83						0.81	0.82	0.82	0.82	0.83				194.53						423.97	552.64								1442.56	967.57
	98	0.84						0.85	0.85	0.86							0.84	0.84	0.84						0.84	0.85	0.86	0.86					389.32						410.18	2960.01	561.27							1168.01	974.24
	99							0.89	0.88	0.88							0.87	0.88	0.89						0.87														2609.61	3468.77	388.9							969.85	695.13
	100	0.9	0.9	0.91	0.92	0.92		0.92	0.91	0.9							0.91	0.92	0.92						0.9	0.92							482.66	107.65	588.56	504.91	1081.96		622.91	2729.09	296.41							896.09	1287.66
	101	0.93	0.94				0.92	0.94	0.95			0.95						0.94							0.93	0.93							397.75	405.16				598.11	1027.26	427.43			797.16						3656.05
	102	0.97	0.98	0.98				0.97									0.97	0.96	0.97						0.98								617.41	454.22	782.28				666.59									2605.33	1109.82
	103	1.01	0.99					0.99	1.01								1																1363.03	1113.36					512.96	1105.55								852.43
	104											1.02	1.02				1.03	1.02							1.02																		1071.38	1154.14				899.15	3148.87
	105							1.06									1.05	1.05																					2195.71									2147.05	1011.19
	106	1.08	1.1	1.1				1.08									1.09																986.91	571.09	590.56				4152.62									982.61
	107	1.11						1.11	1.12	1.13	1.13						1.11								1.12								549.69						569.4	604.14	2150.34	682.3						3108.35
	108	1.16						1.14	1.15								1.15	1.16							1.15								729.08						2283.85	2892.19								738.55	1097.34
	109	1.18						1.17	1.18																1.17	1.18							695.2						2537.7	2056.47
	110	1.21						1.2	1.21																								1195.42						4495.02	1093.25
	111	1.24	1.26					1.25	1.25																1.24	1.24							978.33	468.34					2054.05	1029.26
	112	1.29	1.29					1.28																	1.29								1489.93	2368.92					522.34
	113	1.34	1.33					1.31	1.32								1.3	1.3	1.3						1.3								306.35	1262.93					1167.18	1796.85								1079.85	1702.19
	114							1.33	1.35																1.35														263.52	1419.25
	115	1.37	1.37					1.36	1.38																1.36								1763.08	449.51					640.66	4318.46
	116							1.39									1.39	1.4							1.4	1.41													2954.52									1593.02	1566.53
	117	1.43															1.42	1.42							1.42								837.07															1038.79	1018.41
	118							1.47	1.47																1.46														1440.51	2169.53
	119	1.48						1.49	1.48																1.5								617.15						3310.43	1702.33
	120							1.51	1.53																1.54														1271.57	2460.65
	121	1.57						1.58	1.57																1.58	1.58							1962.55						1715.86	750.08
	122																1.6								1.62																							2763.65
	123		1.68	1.69																					1.69									1246.56	2473.21
	124	1.76						1.76				1.78					1.72	1.71							1.78								736.7						833.29				938.76					1963.76	2338.13
	125	1.8															1.8	1.81															2119.6															1498.16	1390.12
	126																1.82																															4579.38
	127	1.84	1.86					1.86									1.85								1.84								1463.2	581.31					1007.87									1342.82
	128	1.91						1.92																									823.1						1326.27
	129	1.95	1.94														1.96								1.98								654.42	4255.58														1504.37
	130	2.03						2																	2.06	2.02							958.09						1215.29
	131	2.08	2.1					2.13									2.12								2.11								2341.25	838.79					3851.92									1406.26
	132							2.19									2.18																						1051.12									1966.03
	133	2.23						2.28									2.24								2.3	2.35							346.84						1483.25									737.1
	134	2.41															2.49	2.48															2682.46															2346.14	1202.45
	135	2.57																															1754.2
	136	2.63						2.65									2.62								2.61								1729.34						3185.43									3429.53
	137
	138	2.79						2.84																	2.78								2336.47						3126.01
	139
	140	2.93																															2415.81
	141							3.04																															5083.94
	142																3.3																															2562.92
	143																3.81																															3056.88
	144
	145
	146							0.86																															4662.46
	147							0.8																															3174.89
	148
	149	0.74																															2890.43
	150	2.71																															3289.94
	151	1.05																															4160.76
	152	0.99																															4310.91
	153											0.79					0.79								0.64																		2622.64					2622.64
	154											0.52					0.52								0.43																		2974					2974
	155							0.48				0.47					0.47								0.29														6591.65				2792.55					2792.55
	156							0.3	0.3			0.35					0.35																						6217.63	5685.36			2884.51					2884.51
	157							0.29																															6156.87
	158	0.28						0.27																									1526.18						3768.88
	159							0.25																	0.25														5779.4
	160							0.23	0.24	0.24		0.23					0.23								0.24	0.24													2185.23	1887.94	2694.13		3256.26					3256.26
	161	0.22						0.22				0.22					0.22																1609.56						5113.19				1751.14					1751.14
	162	0.21						0.21																		0.13							2745.44						6446.48
	163	0.2	0.2									0.2	0.2				0.2	0.2								0.06							1322.47	1500.43									2018.59	1761.35				2018.59	1761.35
	164	0.19	0.19					0.19	0.19	0.19	0.19	0.19					0.19																3049.43	1115.09					2747.4	4468.53	2260.71	1885.09	1218.63					1218.63
	165	0.18	0.18					0.18				0.18					0.18																1194.11	1214.85					4415.49				2140.61					2140.61
	166	0.17										0.17	0.17				0.17	0.17							0.17								1556.89										2637.3	2185.19				2637.3	2185.19
	167											0.16	0.16	0.16			0.16	0.16	0.16						0.16																		2745.51	2411.86	1731.17			2745.51	2411.86
	168	0.16	0.16									0.16	0.16	0.16			0.16	0.16	0.16														3739.94	1613.48									1582.45	1602.51	2431.43			1582.45	1602.51
	169											0.16	0.16				0.16	0.16																									1602.89	1506.37				1602.89	1506.37
	170	0.15	0.15	0.15								0.15	0.15				0.15	0.15							0.15	0.15							1528.58	1828.11	1183.92								2195.39	1882.34				2195.39	1882.34
	171	0.15																															1853.18
	172	0.14	0.14	0.14				0.14	0.14	0.14		0.14	0.14	0.14	0.14		0.14	0.14	0.14	0.14													3365.82	4149.9	1820.92				2182.56	1890.5	2150.57		2621.42	2969.93	2754.85	1510.34		2621.42	2969.93
	173	0.14	0.14									0.13	0.13	0.13			0.13	0.13	0.13						0.13								1295.69	1335.8									1843.18	1710.83	2035.42			1843.18	1710.83
	174	0.13	0.13																														1194.59	1474.26
	175	0.13	0.13	0.13				0.13																									3427.62	2204.96	1475.99				4158.35
	176	0.12	0.12	0.12				0.12	0.12	0.12		0.12	0.12	0.12			0.12	0.12	0.12														2800.97	1814.42	1838.27				1447.02	1856.38	2385.85		3411.6	3267.26	3643.1			3411.6	3267.26
	177	0.12	0.12	0.12																													1688.74	1894.69	1665.43
	178	0.11	0.11	0.11	0.11			0.11	0.11			0.11	0.11	0.11			0.11	0.11	0.11														1872.5	3726.19	2924.57	2306.15			1869.64	1669.8			3684.19	2467.18	3093.81			3684.19	2467.18
	179	0.11	0.11	0.11								0.11	0.11	0.11			0.11	0.11	0.11														1681	2306.15	1616.12								2758.64	1443.35	2094.69			2758.64	1443.35
	180	0.11	0.11									0.11	0.11	0.11			0.11	0.11	0.11														1710.92	1660.35									1427.6	2748.91	1032.67			1427.6	2748.91
	181											0.11	0.11	0.11			0.11	0.11	0.11																								1303.08	2060.23	1504.43			1303.08	2060.23
	182	0.1	0.1	0.1				0.1	0.1	0.1		0.1	0.1	0.1			0.1	0.1	0.1						0.1								1912.28	1640.88	3038.67				3049.08	4343.85	2831.06		3112.19	3558.3	2033.36			3112.19	3558.3
	183	0.1	0.1	0.1				0.1	0.1			0.1	0.1	0.1			0.1	0.1	0.1														3006.54	1339.35	1553.87				2744.31	2715.5			2573.11	2049.94	2583.96			2573.11	2049.94
	184	0.1	0.1	0.1								0.1	0.1	0.1			0.1	0.1	0.1														2306.01	1544.42	2393.73								2330.21	1654.18	1433.85			2330.21	1654.18
	185	0.1	0.1	0.1	0.1							0.1	0.1				0.1	0.1															1467.56	1403.77	1061.61	1565.79							1801.5	2104.94				1801.5	2104.94
	186							0.09	0.09	0.09		0.09	0.09	0.09			0.09	0.09	0.09																				2197.55	3100.29	3170.26		1556.1	2203.25	2866.21			1556.1	2203.25
	187	0.09	0.09	0.09				0.09	0.09	0.09		0.09	0.09	0.09			0.09	0.09	0.09														2868.42	2874.18	1641.33				3827.6	2974.4	4134.68		3653.96	2866.21	1686.07			3653.96	2866.21
	188	0.09	0.09	0.09	0.09			0.09	0.09	0.09		0.09	0.09	0.09			0.09	0.09	0.09														2162.06	2132.07	1405.86	1842.82			3534.79	3048.83	2599.83		1456.29	1856.92	1239.63			1456.29	1856.92
	189	0.08	0.08	0.08				0.08	0.08			0.08	0.08	0.08			0.08	0.08	0.08														1960.41	1581.76	1720.56				1991.01	4199.52			2349.33	2593.96	2593.96			2349.33	2593.96
	190	0.08	0.08	0.08					0.08	0.08		0.08	0.08	0.08			0.08	0.08	0.08						0.08								1545.63	2137.82	1495.56					3980.59	2052.33		2932.57	3472.84	2959.73			2932.57	3472.84
	191	0.08	0.08	0.08				0.08	0.08			0.08	0.08	0.08	0.08		0.08	0.08	0.08	0.08													1615.15	1784.65	1319.43				2709.28	4110.83			2593.96	2263.34	2435.44	1919.39		2593.96	2263.34
	192	0.07	0.07	0.07				0.07	0.07	0.07		0.08	0.08	0.08			0.08	0.08	0.08														2911.56	3168.57	3024.22				4460.24	2461.05	2611.6		1345.64	1043.57	1348.38			1345.64	1043.57
	193	0.07	0.07	0.07				0.07	0.07	0.07		0.07	0.07	0.07			0.07	0.07	0.07														2146.36	1905.53	2440.32				1934.11	2463.99	2620.26		1977.41	2854.8	2755.56			1977.41	2854.8
	194	0.07	0.07	0.07				0.07				0.07	0.07	0.07			0.07	0.07	0.07														2104.92	2457.15	1538.76				2500.72				2358.76	2236.72	1500.05			2358.76	2236.72
	195	0.07	0.07									0.07	0.07	0.07			0.07	0.07	0.07	0.07													2525.66	1534.19									1466.02	2523.89	1099.28			1466.02	2523.89
	196	0.06	0.06	0.06	0.06			0.06	0.06	0.06		0.06	0.06				0.06	0.06	0.06														3224.89	2764.56	2519.58	2711.03			3009.71	2760.86	2176.01		2717.14	1400.62				2717.14	1400.62
	197	0.06	0.06	0.06				0.06				0.06	0.06	0.06			0.06	0.06	0.06						0.06								1481.98	2330.93	1599.84				2502.23				1834.74	1848.52	2485.71			1834.74	1848.52
	198	0.05	0.05									0.05	0.06				0.05	0.05															1169.71	956.71									2217.04	1777.2				2217.04	1249.18
	199
	200
	201
	202
	203
	204
	205
	203
	204
	205
[truncated: 14 more columns]

## Sheet: Figure 4G-I
Figure 4
	G																	H						I
	A	B	C	D	E	F	A' normal	B' normal	C' normal	E' normal	F' normal	A Early	B Early	C Early	E Early	F Early		A	B	C	E	F		406 Ctrl	HS 394	HS 406	HS 406 (Recovery)
	388.19	403.09	423.65	2438.97	1942.51	2114.26	3224.89	3009.71	1739.97	2717.14	4465.83	2018.6	1807.85	1886.37	2022.38	4948.25		2	26	98	3	58		hs>CKI-1::BFP	rps-0>Dhb::mK2	hs>CKI-1::BFP	hs>CKI-1::BFP
	541.35	3984.91	1344.18	1847.38	1644.42	1904.01	2764.56	4460.24	1986.32	2854.8	3048.21	1778.61	1554.55	1218.25	1494.83	3258.31								0.0926282	0.533641	0.140031	0.508896
	596.59	137.28	807.31	1498.58	1695.92	2112.98	2519.58	3980.59		1977.41	4401.27		1483.62	1244.76	1447.86	4110.1								0.146059	0.186758	0.175849	0.504342
	191.57	358.78	770.18	1845.25	1296.64	1701.9	2911.56	4110.83		2959.73	3660.85		979.262	1694.18		3497.99								0.096562	0.175025	0.0912903	0.161538
	283.77	4152.62	537.38	2239.23	1175.62	1210.35	3168.57	3534.79		3472.84	2995.18		1710.29	1233.27		2559.15								0.099475	0.747188	0.0980838	0.0938477
	347.91	417.62	797.16	1768.49	734.71	1646.16	3024.22	4134.68		2932.57	3275.96		1984.54	1626.99		2871.06								0.0814202	4.75554	0.0689389	0.250181
	526.17	720.08	1071.38	1747.48	1143.64	1660.71	3036.99	2974.4		2866.21	1859.81		2530.6	1525.78		2536.37								0.167317	2.65719	0.077748	0.265914
	396.87	743.66	1016.47	2735.64	954.72	1297.54	2928.1	3827.6		3653.96	2529.71		1320.55	800.724		2184.01								0.0909848	3.68116	0.0714984	0.379475
	236.63	3738.53	1154.14	1750.45	1179.26	785.56	2868.42	2831.06		3558.3	3238.1		1719.82	1214.61		5290.32								0.141928	5.00205	0.0753766	0.287823
	350.83	1371.55	931.24	1810.6	920.15	1293.95	2874.18	4343.85		3112.19	3350.78		1842.09	1358.85		2809.46								0.0733996	1.19659	0.141281	0.22227
	176.61	2456.36	2312.54	1331.1	1299.77	1318.27	1640.88	3049.08		2758.64	2163.09		1458.83	1399.71		1858.85								0.11202	0.658462	0.114928	0.388541
	238.11	297.61	1779.87	1624.25	1034.49	1320.42	1912.28	4158.35		3093.81	2429.94		2079.24	1261.19		2399.24								0.297748	2.00685	0.22773	0.339462
	294.01	423.97	779.33	1553.35	1005.46	1328.41	3038.67	2182.56		2467.18	1462.43		1874.44	941.591		3752.36								0.0688265	1.38427	0.12273	0.422921
	664.41	2960.01	750.56	2034.08	1078.01	1354.02	3006.54	4415.49		3684.19	2678.34		2620.26	1258.22		2167.3								2.18555	1.02275	0.209127	0.213168
	462.02	561.27	1312.61	2125.2	1040.43	1018.42	1872.5	4468.53		3643.1	3292.97		1597.51	1177.56		2507.49								0.663169	0.182497	0.0930014	0.308631
	539.78	388.9	1301.79	1637.03	726.31	1385.26	3726.19	2747.4		3267.26	2296.86		1862.04	1326.69		2358.26								0.599922	0.228821	0.0905468	0.193522
	107.65	3468.77	1751.97	1849.46	922.53	1808.31	2924.57	6446.48		3411.6			2329.3	1680.56		3403.48								1.25131	0.279133	0.0826117	0.236435
	482.66	2609.61		2196.09	1077	1611.03	2306.15	5113.19		2621.42				2886.32		1665.95								0.770477	0.288359	0.154028	0.1721
	598.11	296.41		1928.38	1523.78	1218.54	1681	2185.23		2969.93				1144.43		1882.44								0.773708	2.19012	0.169535	0.141596
	1081.96	2729.09		2174.28	566.44	1194.89	2800.97	5779.4		2195.39				1276.14		2127.62								0.317381	0.859799	0.204015	0.283734
	397.75	622.91		1973.97	1442.56	597.88	1814.42	3768.88		2411.86				1296.3		2121.33								0.195398	0.143702	0.174617	0.277758
	782.28	427.43		1848.56	967.57	784.24	3427.62	6156.87		2745.51				1164.9		1322.26								0.332257	0.0890777	0.0511385	0.11433
	1113.36	666.59		1882.03	1061.66	1777.8	2204.96	5685.36		2637.3				1318.18										0.143597	0.161353	0.0468235	0.132999
	1363.03	512.96		1376.22	1168.01	1387.11	1475.99	6217.63		3256.26				960.569										0.136269	0.286377	0.075014	0.135353
	986.91	1105.55		2586.1	695.13	1197.44	3365.82	6591.65		2884.51				1580.78										0.148385	0.17598	0.0730682	0.201201
	590.56	2195.71		1861.8	896.09	2099.48	4149.9	1887.94		2792.55				1190.88										0.259709	0.290634	0.0511385	0.157338
	549.69	569.4		1129.77	1287.66	1272.96	1820.92	2260.71		2974				1343.64										0.199257	0.164562	0.0468235	0.315213
	729.08	682.3		1924.49	978.36	1327	3739.94	1885.09		2622.64				916.66										0.51998	0.2041	0.075014	0.197906
	2368.92	2150.34		1619.4	1147.52	1060.51	3049.43	1890.5		2185.19				960.583										0.164268	0.15336	0.0730682	1.40333
	1262.93	2537.7		2605.85	1005.13	1101.75	1115.09	2150.57		1731.17				3163										0.509819	0.155271	0.125623	0.370238
	306.35	2056.47		1381.75	3108.35	1082.88	1322.47	1447.02		1582.45				1196.45										0.323437	0.202695	0.0749941	1.35817
	1763.08	4495.02		1970.2	1097.34	1194.53	2745.44	2385.85		1602.51				1797.84										0.223117	0.0875243	0.151239	0.212287
	617.15	1029.26		1291.36	1079.85	806.78	4310.91	1869.64		2431.43				1013.83										0.497317	0.519511	0.128019	0.434297
	4255.58	2054.05		2008.98	1702.19	1310.93	4160.76	2744.31		1882.34				1104.29										0.206625	0.35789	0.126417	0.24181
	405.16	522.34		2955.65	1593.02	796.9	1609.56	2715.5		2754.85				1480.27										0.211039	0.251093	0.114092	0.188465
	2473.21	1796.85		1808.69	1566.53	1398.05	1556.89	3048.83		1843.18				1216.72										0.214255	0.231731	0.219567	0.175837
	2119.6	2954.52		2591.88	1038.79	1222.36	1613.48	2599.83		1710.83				1540.46										0.240897	0.23395	0.179663	0.201715
	1463.2	3310.43		1683.72	2763.65	1109.05	1528.58	2197.55		1443.35				1971.63										0.611461	0.3914	0.160947	0.194347
	823.1	2460.65		1384.94	1498.16	930.03	1828.11	3100.29		2094.69				1027.39										0.71655	0.243698	0.175304	0.237781
	654.42	750.08		1679.33	1016.47	924.52	1295.69	3170.26		1427.6				2649.55										0.522707	0.222207	0.0846771	0.157259
	958.09	1007.87		1972.41	1390.12	727.9	1474.26	2052.33		2748.91				791.996										0.561835	0.134872	0.130065	0.410651
	2341.25	1326.27		1294.53	1342.82	1267.85	1194.59	1991.01		2033.36				956.335										0.686004	0.128516	0.141014	0.817409
	838.79	1215.29		1575.42	1504.37	1020.19	1838.27	4199.52		2573.11				1310.88										0.204517	0.176598	0.0999267	0.27824
	2682.46	1051.12		1516.13	1406.26	977.63	1688.74	2461.05		2049.94				889.674										0.233379	0.173707	0.158523	0.21498
	2415.81	1483.25		2209.15	1966.03	1266.69	1616.12	2611.6		2330.21				1278.13										0.673315	0.192412	0.0614021	0.226132
	2890.43	3185.43		1196.64	2346.14	1522.89	1339.35	1934.11		1654.18				692.704										0.666071	0.117655	0.0677634	0.196586
	3289.94	5083.94		1050.8	2979.89	1853.97	1553.87	2463.99		1433.85				1806.43										0.284243	0.251524	0.144708	0.180219
	625.69	3174.89		4318.01	2338.13	1712.1	2306.01	2620.26		2583.96				1816.03										0.275479	0.150275	0.119523	0.165707
	421.73	4662.46		1820.7	3429.53	2542.41	1544.42	2500.72		1686.07				1951.89										0.748775	0.16026	0.0607501	0.375037
	372.11	371.28		1077.9	2562.92	4399.85	2393.73	2760.86		1456.29				1325.64										1.57392	0.152112	0.0575115	1.12611
	738.38	536.43		1583.37	2979.89	4514.98	1467.56	2694.13		1856.92				1169.34										0.274691	0.14971	0.0808159	0.959763
	545.63	505.84		1244.84	2338.13	3234.13	1403.77	1856.38		2203.25				1501.95										0.299736	0.142567	0.0900123	0.641259
	183.03	728		1729.73	3429.53	4015.8	1641.33	1669.8		1556.1				1024.65										0.70341	0.223802	0.089233	0.427132
	177.61	367.44		1973.83	2562.92	3008.67	2162.06	2709.28		2349.33				1624.51										1.27433	0.177962	0.0824574
	360.89	545.01		1525.47	2210.72	2478.36	2132.07	2176.01		2593.96				1147.41										0.387658	0.177962	0.0974686
	488.01	407.3		1725.74	1545.36	3232.48	1405.86	2502.23		2263.34				1783.01										0.304535	0.0764191	0.118554
	186.09	451.42		1546.38	808.21	4384.83	1545.63			2435.44				1396.21										0.963672	0.212683	0.071441
	458.41	748.11		1988.34	996.6	1300.65	2137.82			2755.56				1270.89										0.236661	0.245295	0.0623978
	685.16	608.86		1814.74	1173.19	1744.06	1495.56			2358.76				1275.08										0.274359	0.170358	0.208748
	424.84	675.79		1302.88	997.44	3028.78	1960.41			2236.72				1269.14										0.213316	0.283548	0.145733
	194.53	290.93		1604.07	1766.48	3713.16	1581.76			1466.02				1163.67										0.270041	1.09285	0.128893
	504.91	988.83		893.88	1337.6	2677.09	1720.56			2523.89				883.335										0.645867	0.0890113	0.108292
	617.41	4361.05		1169.8	1078.97	1925.2	2146.36			1400.62				1053.08										0.323615	0.194943	0.0455142
	454.22	778.49		1597.3	953.38	1478.17	1905.53			1777.2				1008.55										0.144235	0.190307	0.0832857
	978.33	2073.5		1957.99	723.22	3683.99	2440.32			1834.74				1071.33										0.196932	0.189958	0.0362542
	468.34	1105.45		1399.23	734.48	1465.08	2104.92			1848.52				1032.64										1.28517	0.193025	0.0784871
	449.51	2283.85		1774.51	801.35	2712.79	2457.15			2485.71				1084.23										0.202848	0.222497	0.0976775
	837.07	1093.25		1825.24	935.09	2816.38	1538.76			2217.04				973.874										0.284406	0.337954	0.107667
	1246.56	263.52		1183.64	1143.51	1855.6	2525.66			1751.14				957.424										1.72699	0.232165	0.179151
	736.7	640.66		1308.13	855.62	1979.68	2711.03			2018.59				1538.47										1.10531	0.194923	0.106139
	581.31	4318.46		1106.8	974.24	3056.88	1481.98			1761.35				1358.19										0.883162	0.600465	0.051739
	1729.34	1702.33		1362.04	718.01	4579.38	2330.93			1218.63				1325.53										0.294302	0.140916	0.152664
	2336.47	1271.57		1450.27	1084.9	3913.75	1599.84			2140.61				1216.7										1.3861	0.119408	0.201066
	523.3	1715.86		1220.85	852.43	4155.1	1526.18			1602.89				1182.5										0.96272	0.0905784	0.150922
	446.03	833.29		1200.89	899.15	3148.87	1500.43			1506.37				1278.52										0.196924	0.0791769	0.153143
	340.63	502.35		1218.39	1011.19	3656.05	1194.11			1510.34				1275.36										0.17306	0.172055	0.0556755
	461.83	571.5		1494.09	1018.41	2591.24	1214.85			2035.42				1309.15										0.703777	0.0803991	0.0829048
	466.36	432.32		912.95	1963.76	952.34	1183.92			1032.67				1394.16										1.30078	0.099026
	475.85	727.82		1216.71	1680.69	1128.68	1853.18			1303.08				1248.14										0.573976	0.226934
	755.91	655.57		1169.86	980.4	829.53	1335.8			2060.23				529.959										0.300314	0.101923
	596.85	666.26		1366.13	816.29	1006.53	1894.69			1504.43				1255.59										0.351595	0.0871126
	417.36	838.11		1672.96	1160.62	777.24	1665.43			1801.5				1110.32										0.272403	0.311903
	433.51	600.59		1391.99	1170.03	1114.25	1710.92			2104.94				1375.11										0.125408	0.13775
	447.08	635.56		1578.16	1303.84	797.02	1660.35			1239.63				1620.63										0.19236	0.112696
	433.31	608.35		1547.42	1180.28	1582.16	1061.61			1345.64				1595.52										0.450493	0.110493
	481.13	370.14		1512.46	1737.03	965.79	1565.79			1043.57				1471.31										0.574375	0.175984
	763.24	617.48		1639.47	890.65	701.97	1842.82			1348.38				1233.93										0.159378	0.102869
	480.01	531.88		1440.96	845.16	1003.38	1615.15			1919.39				1403.61										0.311687	0.193283
	477.43	651.05		1330.31	714.11	1179.12	1784.65			1349.32				1325.55										0.926217	0.129299
	443.38	552.64		1331.94	1110.16	753.88	1319.43			1500.05				1745.96											0.117329
	389.32	410.18		1561.65	887.72	926.65	1534.19			1099.28				1711.25											0.139327
	588.56	1027.26		1300.37	1054.69	851.96	1169.71			1249.18				990.834											0.151894
	571.09	604.14		1521.27	902.58	924.73	956.71							1216.41
	695.2	2892.19		1457.73	1420.7	1181.95								1144.29
	1195.42	1167.18		1663.92	1091.68	999.1								1437.51
	1489.93	1419.25		576.33	1444.27	843.15								1608.8
	1962.55	2169.53		868.74	798.47	947.41								1343.34
	346.84	1440.51		1620.81	932.53	940.15								1627.4
	1754.2	1182.81		1775.41	969.85	946.82								1542.81
		3851.92		1480.39	1109.82	1785.64								1525.82
		3126.01		1693.74	738.55	2310.91								1647.21
				2393.11	737.1	2441.51								1271.07
				2007.33	1202.45	718.15								1437.21
				2228.44		956.22								1142.37
				2532.31		921.09								1699.7
				1338.07		955.37								1691.16
				2112.14		1066.68								1454.73
				2093.39		732.26								1260.52
				2030.73		878.4								1520.65
				1925.7		991.43								1226.45
				2128.82		985.73								1070.3
				2335.28		1889.88								1259.87
				1836.47		1295.88								1035.4
				1525.32		718.17								1823.72
				2038.54		869.33								1371.48
				1786.3		928.97								1086.51
				1431.83		1327.24								1250.06
				1814.93		1145.78								1369.96
				1319.88		832.1								1416.7
				1735.2		1128.16								1321.31
				1765.26		816.95								801.756
				1798.59		1061.61								1345.57
				1622.45		1190.35								1019.98
				1557.19										1697.07
				2404.47										1881.66
				1056.38										1288.02
				2105.56										1329.19
				2292.38										1417.06
				1649.71										2286.51
				2184.72										1106.15
				1820.35										1103.99
				2443.33										1128.96
				2334.5										1430.38
				1852.64
				1797.92
				2376.46
				2422.12
				1755.83
				2158.57
				2076.11
				1649.22
				1851.89
				1352.94
				2296.65
				1463.77
				2211.36
				1436.44
				1043.73
				1723.18
				1722.68
				1664.89
				1544.06
