# Supplementary material for: Visualizing the metazoan proliferation-quiescence decision in vivo
Source: eLife. 2020 Dec 22;9:e63265. doi: 10.7554/eLife.63265 (PMC7880687; doi:10.7554/eLife.63265)
Supplement: Figure 5—source data 1. — Raw data of DHB ratios used to generate Figure 5D in Microsoft Excel format. [file elife-63265-fig5-data1.xlsx]

## Sheet: Figure 5
Figure 5
	D	C cell																																										D
	Time (min)	cell 1	cell 2	cell 3	cell 4	cell 5	cell 6	cell 7	cell 8	cell 9	cell 10	cell 11	cell 12	cell 13	cell 14	cell 15	cell 16	cell 17	cell 18	cell 19	cell 20	cell 21	cell 22	cell 23	cell 24	cell 25	cell 26	cell 27	cell 28	cell 29	cell 30	cell 31	cell 32	cell 33	cell 34	cell 35	cell 36	cell 37	cell 38	cell 39	cell 40	cell 41		Cell 1	Cell 2	Cell 3	Cell 4	Cell 5	Cell 6
	-355																						0.196739
	-350																						0.189341																										0.0909878
	-345																						0.174155																										0.106323
	-340																						0.141494		0.370055																								0.0948131
	-335																						0.124227		0.255181																								0.102303
	-330																						0.109118		0.205747																								0.0978749
	-325																						0.136615		0.143821																								0.125883
	-320																						0.157724		0.145021																								0.111713
	-315																						0.211663		0.178389																								0.107938
	-310																						0.177687		0.247347																								0.10656
	-305																						0.160566		0.228433																0.379725								0.119751
	-300																						0.189401		0.216646																0.338981								0.110553
	-295																						0.187417		0.195614																0.34561								0.111072
	-290																						0.1855		0.206824												0.203406				0.259395								0.0777087
	-285																						0.141023		0.179801												0.195999		0.579497		0.280735								0.146408
	-280																						0.163071		0.170537												0.220352		0.635745		0.299254								0.0911413
	-275																						0.16124		0.157371												0.300541		0.598562		0.275401								0.0958638
	-270																						0.161019		0.198605												0.290282		0.491429		0.298152								0.0851702
	-265																						0.156372		0.174517												0.303953		0.716963		0.277749								0.084433
	-260																						0.1787		0.195116												0.413874		0.435412		0.314998								0.070688
	-255																						0.193698		0.190276												0.589902		0.505978		0.274724								0.0779665
	-250																						0.202375		0.132711												0.378066		0.467544		0.283203								0.0864388
	-245																						0.185399		0.143755												0.418115		0.429516		0.280107								0.0745126
	-240																						0.198321		0.174979												0.387815		0.3597		0.200073								0.0625433
	-235																						0.198605		0.163327												0.407809		0.331714		0.235528								0.0657358
	-230																						0.14836		0.15959												0.516979		0.36677		0.228127								0.066832
	-225																						0.165526		0.163071												0.541354		0.377381		0.259681								0.0806219
	-220																						0.15648		0.188601												0.390216		0.292709		0.348923						0.150242		0.076827
	-215																						0.208077		0.194347												0.404315		0.284192		0.323189						0.132686		0.0657669
	-210														0.288966								0.164791		0.176159												0.540309		0.367263		0.308228						0.145311		0.0719156
	-205				0.812788		0.810771								0.254618		0.393886						0.191597		0.194451												0.635897		0.277146		0.316277				0.201058		0.151175		0.0836687
	-200				0.536737		0.472565								0.252002		0.295713		0.19624				0.206579		0.18643												0.764008		0.295863		0.290633				0.125158		0.138272		0.0788061
	-195				0.698398		0.415832								0.320359		0.3638		0.157686				0.195331		0.18133										0.83279		0.886635		0.3215		0.239339				0.132038		0.136832		0.079715
	-190				0.82222		0.205108								0.291987		0.393556		0.16352				0.200489		0.201592										0.974513		0.629051		0.289652		0.248044				0.140854		0.103854		0.0794337
	-185	0.119103			0.560028		0.194125		0.149276						0.353052		0.371289		0.132517				0.224005		0.168993										0.939769		0.564745		0.305514		0.368753				0.142195		0.123554	0.0900002	0.0834477
	-180	0.134269			0.357391		0.208388		0.216795						0.312757		0.312826		0.121709		0.217569		0.211284		0.197494										1.24209		0.40935		0.292861		0.30355				0.106964		0.114176	0.0754115	0.0752921
	-175	0.125412			0.265877		0.250351		0.115398						0.295626		0.277986		0.144886		0.194752		0.216192		0.18423										1.34011		0.4913		0.336313		0.281416				0.11027		0.109344	0.0723928	0.0718327
	-170	0.131734			0.254214		0.454483		0.158083						0.287849		0.267154		0.150334		0.190551		0.205063		0.201266										1.2186		0.53504		0.380696		0.293748				0.106194		0.106011	0.0705128	0.0731005
	-165	0.137271			0.250793		0.383494		0.201061						0.305076		0.312665		0.15602		0.183508		0.320264		0.214514										1.12042		0.635344		0.353663		0.319987				0.113439		0.10118	0.051529	0.0904884
	-160	0.20899			0.327494		0.374863		0.232559						0.315312		0.32664		0.117993		0.188673		0.265261		0.214352										1.12137		0.48844		0.340077		0.269122				0.100301		0.102386	0.0683581	0.0943643
	-155	0.233407			0.399206		0.339173		0.231772						0.275427		0.278609		0.122474		0.203888		0.261685		0.242061										1.0912		0.516998		0.414488		0.350538				0.111673		0.113378	0.0650852	0.0806484
	-150	0.239682			0.289143		0.45288		0.189127						0.338256		0.261543		0.129768		0.196953		0.313499		0.218393										1.03865		0.556891		0.371951		0.341634				0.107807		0.107074	0.0610226	0.0836775
	-145	0.280737			0.461223		0.40715		0.155451						0.352211		0.293911		0.185871		0.177463		0.259194		0.235214										0.982705		0.542776		0.348589		0.398743				0.122694		0.120193	0.0674969	0.0762952
	-140	0.22278			0.302667		0.476575		0.172692						0.301651		0.346144		0.204799		0.17848		0.293596		0.212212										1.02721		0.512468		0.381723		0.524323				0.14986		0.0987298	0.0708849	0.0875314
	-135	0.290863			0.318791		0.502413		0.216021						0.308065		0.347253		0.207484		0.193459		0.280204		0.202184										0.790881		0.542784		0.402393		0.47253			0.113838	0.0913209		0.127643	0.077015	0.0891567
	-130	0.366561	0.212337		0.31526		0.448532		0.27134						0.304632		0.38553		0.177143		0.208103		0.250586		0.219602										0.71296		0.574849		0.449126		0.616446			0.1081	0.104962		0.111128	0.0805505	0.093539
	-125	0.317451	0.215065		0.371123		0.485004		0.212758						0.329138		0.342507		0.189494		0.249528		0.299453		0.255257										0.910434		0.614222		0.426193		0.621849			0.138917	0.0803764		0.121727	0.0843718	0.103416
	-120	0.36894	0.229326		0.478705		0.499548		0.302902						0.297406		0.428299		0.165214		0.240952		0.29341		0.271479										0.956358		0.644847		0.363969		0.593738			0.0865314	0.0941246		0.152561	0.0878769	0.079899
	-115	0.36038	0.220434		0.392297		0.401791		0.245814						0.351269		0.274018		0.170619		0.273025		0.340299		0.28772										0.857705		0.471268		0.459158		0.660146			0.121277	0.0963387		0.133872	0.0905627	0.09954
	-110	0.334102	0.309519		0.425595		0.469215		0.429534						0.379652		0.295248		0.170861		0.290321		0.334829		0.313642										0.924598		0.55755		0.533659		0.638784			0.154899	0.104967		0.133141	0.102529	0.103477
	-105	0.335983	0.292418		0.478962		0.512484		0.348265						0.391573		0.276398		0.260914		0.269356		0.283523		0.287826										1.07244		0.794446		0.542759		0.828959			0.116891	0.116159		0.174217	0.0947796	0.0740029
	-100	0.372841	0.411373		0.389436		0.616836		0.232171						0.462413		0.313096		0.319145		0.279012		0.285279		0.317786										1.06647		0.738936		0.595459		0.808376			0.139405	0.0884277		0.138692	0.109774	0.0811799
	-95	0.436566	0.423485		0.43088		0.656054		0.256027						0.518603		0.343489		0.289741		0.272822		0.38528		0.333696										1.07548		0.658621		0.419256		0.760978			0.110131	0.0660693		0.180083	0.17892	0.088836
	-90	0.479689	0.241629		0.382953		0.473747		0.238486				0.271751		0.517954		0.374934		0.312251		0.290491		0.416095		0.372563										1.27087		0.794492		0.557058		0.884602			0.11238	0.0906452		0.131604	0.102985	0.0951476
	-85	0.571957	0.360323		0.342904		0.490938		0.308821		0.396395		0.202059		0.510071		0.358617		0.374272		0.375662		0.745124		0.335716								0.253425		1.16122		0.838889		0.662432		0.784898			0.111767	0.0726046	0.104769	0.135714	0.14798	0.11302
	-80	0.639974	0.313503		0.441846		0.569906		0.345102		0.437897		0.248657		0.44303		0.37443		0.366092		0.511432		0.757585		0.347739								0.178571		1.12744		0.780731		0.431737		0.910117			0.128642	0.112721	0.086439	0.19194	0.175902	0.115286
	-75	1.02261	0.34101		0.538724		0.53427		0.359794		0.454837		0.239306		0.565565		0.47994		0.541221		0.506973		0.897539		0.459959								0.213		1.00755		0.805392		0.707703		0.905342			0.122231	0.0732942	0.102126	0.14963	0.190661	0.0917656
	-70	1.10551	0.330291		0.555061		0.630743		0.469066		0.444984		0.260401		0.455771		0.478673		0.462144		0.474341		0.951222		0.406596								0.276306		1.04128		0.781377		0.633579		0.852776			0.128551	0.0657139	0.09069	0.150017	0.195112	0.140884
	-65	0.97565	0.242523		0.637318		0.659207		0.513221		0.302139		0.287484		0.668577		0.466827		0.535738		0.634624		0.896253		0.530855						0.391796		0.343805		1.35162		0.661393		0.995898		1.0099			0.129469	0.0973411	0.106435	0.128192	0.19082	0.0800343
	-60	1.08631	0.357374		0.68092		0.892764		0.381648		0.518663		0.325522		0.844363		0.937429		0.854707		0.733237		1.20101		0.615669				0.768942		0.405709		0.411033		1.35101		0.806612		0.885794		0.838966			0.108264	0.102468	0.115667	0.124473	0.151138	0.0877986
	-55	0.646566	0.391878		0.862145		0.91744		0.400967		0.498129		0.565815		1.10826		0.701436		0.739691		0.905254		1.29236		0.571815				0.907785		0.406564		0.542654		1.40582		0.750702		1.44454		0.951219			0.103459	0.111491	0.120415	0.110938	0.119833	0.0957972
	-50	0.998414	0.540017		0.83374		0.88573		0.366899		0.64406		0.716088		1.02637		0.982556		0.844919		1.29194		1.10593		0.71118				0.806198		0.548973		0.693719		1.31205		1.0123		1.09779		0.933049			0.156526	0.102502	0.107629	0.120887	0.140703	0.118285
	-45	1.09423	0.671305		1.17324		1.22747		0.4268		0.770512		0.708872		1.13602		0.91434		0.818888		0.955995		1.06284		0.682037				0.905426		0.658269		0.773776		1.4122		0.833899		0.716911		0.81366			0.123352	0.0917711	0.142322	0.129756	0.143954	0.103335
	-40	1.18249	0.682218		1.56171		1.02495		0.446419		0.835823		0.978078		1.21013		0.82985		0.936996		0.633176		1.42217		0.51981				1.14156		0.561491		1.06835		1.63721		0.840725		0.847682		0.871242			0.108225	0.103677	0.120094	0.130104	0.113201	0.108393
	-35	1.01052	0.106139		1.27807		1.00066		0.498241		0.792084		1.17559		1.12255		0.919973		1.47841		0.65736		1.21731		0.973995				1.00064		0.667718		1.27449		1.57916		1.02543		0.781944		1.01572			0.143315	0.105423	0.150224	0.121287	0.129645	0.0959123
	-30	0.861765	1.11383		1.44248		1.22856		0.550429		0.894211		0.957571		1.07157		0.964644		1.32795		0.767602		1.15733		0.835692				0.906051		0.951236		1.44239		1.59175		0.949902		1.47573		1.07676			0.130928	0.115111	0.162576	0.110503	0.116831	0.0860169
	-25	1.0428	0.879254		1.05779		0.473183		0.579018		1.16114		0.999665		1.75553		0.906887		1.02394		0.570767		1.28203		0.757638		0.894742		1.03437		0.968576		1.19038		1.54505		0.993504		0.923357		1.17282			0.146649	0.14721	0.174812	0.119595	0.108793	0.0814305
	-20	0.847084	1.18168		0.942429		0.902705		0.658609		1.46358		1.38002		0.940596		1.09411		1.20209		0.715938		1.91222		0.781432		1.27073		1.08924		1.26347		1.55061		1.50787		1.33888		1.14717		0.992523			0.149669	0.170809	0.225444	0.128318	0.108157	0.078584
	-15	1.00911	1.53456		0.858556		0.726685		0.681694		0.612022		1.06634		0.983554		1.18903		1.21511		1.28874		0.751388		1.58626		1.32428		1.27129		1.02922		1.263		1.49806		1.30826		1.14403		0.992408			0.134573	0.184139	0.158409	0.110833	0.121496	0.114306
	-10	1.16906	1.36983		0.716141		0.516196		0.983441		0.958558		0.563287		0.730137		0.767936		0.417455		0.727887		0.522579		1.07766		1.01943		0.802574		1.46267		1.58492		0.914276		0.455545		1.50215		0.564807			0.157242	0.0745157	0.170451	0.0886381	0.135335	0.114227
	-5	0.904843	0.748282		1.10278		0.288572		1.03511		0.806223		0.633383		1.06186		0.743755		0.987968		0.592866		0.837622		0.825337		0.576121		0.616058		1.10186		0.840099		0.943368		0.979745		1.17209		0.791139			0.140123	0.0854952	0.14159	0.105498	0.131967	0.145186
	0		1.23351	0.694655	0.844076	0.797318	0.317655	0.919354	1.11977	0.992839	0.750537	0.893827	0.597033	0.635985	0.617829	1.46689	0.974144	0.708213	1.01173	1.62325	0.82151	0.833944	0.742462	0.447966	0.361688	0.422768	0.563579	0.412009	0.560428	0.704995	0.608735	0.607307	0.468772	0.75252	0.867794	0.848938	0.461093	0.517269			0.780303	0.874647		0.151253	0.0831689	0.158193	0.0867218	0.146284	0.0947588
	5		0.43633	0.400543	0.538247	0.438823	0.311517	0.52737	0.883125	0.543717	0.554709	0.565897	0.35871	0.456794	0.359427	0.238349	0.447318	0.580144	1.67631	0.42508	0.321261	0.298175	0.593055	0.371014	1.46819	0.593628	0.4858	0.720495	0.478671	0.856172	0.774417	0.525879	0.550965	0.689919	1.27599	0.760045	0.529177	0.262567	0.697795	0.567765	0.746812	0.644448		0.143184	0.0831203	0.198604	0.11364	0.171661	0.052405
	10		0.226441	0.24408	0.273998	0.282811	0.286248	0.351029	0.768737	0.391571	0.471594	0.359127	0.334377	0.322675	0.247383	0.145451	0.214693	0.211023	0.535634	0.372484	0.195428	0.221557	0.402169	0.243769	0.245886	0.299161	0.350046	0.342794	0.333917	0.588319	0.472379	0.461172	0.613298	0.584198	0.350374	0.523633	0.304776	0.161024	0.675032	0.291043	0.526442	0.519026		0.112105	0.0663778	0.194967	0.100417	0.148661	0.0917523
	15		0.140304	0.171416	0.19369	0.294033	0.315478	0.520799	0.398615	0.19744	0.350489	0.370183	0.14648	0.293437	0.305469	0.190742	0.160509	0.200068	0.423977	0.159339	0.153692	0.176584	0.248314	0.122417	0.227412	0.178434	0.201719	0.234863	0.198642	0.432765	0.337196	0.265254	0.512789	0.370864	0.276808	0.374312	0.219531	0.134879	0.240947	0.151234	0.459407	0.472972		0.113971	0.0886812	0.210746	0.119987	0.149972	0.082494
	20		0.150017	0.157554	0.24993	0.299602	0.351141	0.416058	0.184806	0.124153	0.224067	0.306801	0.129253	0.318856	0.203564	0.238023	0.228622	0.122546	0.272221	0.161558	0.120864	0.144821	0.233263	0.224875	0.217475	0.136486	0.17059	0.139218	0.162672	0.264609	0.200584	0.170481	0.330094	0.230832	0.237256	0.326184	0.129835	0.124	0.224265	0.16721	0.43694	0.530009		0.157723	0.0834235	0.197068	0.140824	0.0991746	0.0645793
	25		0.120606	0.141306	0.17829	0.252924	0.211502	0.235977	0.219294	0.129901	0.232425	0.324763	0.116244	0.230912	0.176382	0.190449	0.201822	0.114131	0.163916	0.157383	0.157415	0.13425	0.147515	0.137916	0.218215	0.131617	0.129758	0.114322	0.160328	0.236089	0.184447	0.163269	0.281379	0.245362	0.160247	0.238298	0.180815	0.102403	0.151538	0.109502	0.335144	0.286708		0.181748	0.100239	0.207534	0.128653	0.121105	0.081217
	30		0.0945766	0.154305	0.23359	0.233684	0.229989	0.235975	0.169339	0.144511	0.21489	0.318374	0.13186	0.312417	0.237597	0.176216	0.262494	0.140299	0.167162	0.118391	0.165543	0.147802	0.166785	0.155178	0.146867	0.108116	0.160862	0.152001	0.130644	0.166587	0.166471	0.134546	0.236473	0.205021	0.126401	0.215594	0.153863	0.119647	0.131207	0.132512	0.385096	0.391501		0.202699	0.0930285	0.235947	0.108057	0.129569	0.0754786
	35		0.10736	0.172559	0.289965	0.246547	0.195882	0.252249	0.141779	0.173533	0.232631	0.36692	0.118091	0.306957	0.224014	0.219508	0.136202	0.139393	0.133582	0.123929	0.155531	0.13127	0.124579	0.130939	0.11714	0.13174	0.164644	0.19192	0.148725	0.114648	0.166043	0.123907	0.207209	0.199697	0.144087	0.24195	0.216637	0.103605	0.124608	0.133263	0.359577	0.311469		0.173669	0.104336	0.253116	0.117965	0.0950488	0.0712619
	40		0.0945817	0.160233	0.264889	0.226001	0.222265	0.166001	0.171035	0.126153	0.236623	0.280994	0.148103	0.2748	0.240088	0.169216	0.132007	0.147568	0.12168	0.209394	0.142588	0.0932663	0.0839276	0.137398	0.125544	0.108794	0.138028	0.187227	0.125676	0.149047	0.177919	0.11462	0.156225	0.190974	0.134188	0.196072	0.197687	0.111123	0.123604	0.102327	0.404233	0.290943		0.140694	0.0976165	0.209809	0.0996529	0.139891
	45		0.0935177	0.131714	0.26708	0.241315	0.113262	0.185487	0.143505	0.266985	0.226107	0.274237	0.142991	0.285438	0.197481	0.195534	0.108552	0.130234	0.134716	0.117186	0.201616	0.139041	0.120244	0.136102	0.132952	0.124332	0.115129	0.234466	0.142659	0.144918	0.195454	0.159613	0.14939	0.260226	0.165509	0.185891	0.150132	0.121869	0.137817	0.0986639	0.318006	0.3621		0.112823	0.110806	0.227999	0.124499	0.102116
	50		0.0848853	0.126428	0.294224	0.312262	0.116197	0.170008	0.115879	0.125677	0.175725	0.303258	0.119334	0.302784	0.214998	0.190102	0.109045	0.13925	0.150761	0.12244	0.142189	0.113729	0.0981779	0.100523	0.172401	0.12574	0.155951	0.183805	0.165712	0.140032	0.185621	0.110969	0.167764	0.175779	0.129058	0.12143	0.0944996	0.0980928	0.162528	0.0787535	0.253319	0.374077			0.0987468	0.201262	0.108271	0.138134
	55				0.267894	0.310608	0.174886	0.157866	0.12888	0.132345	0.157812	0.29487	0.127103	0.299848	0.134623	0.174538	0.0934156	0.0991089	0.152976	0.0985016	0.166006	0.16262	0.115818	0.0941056	0.128356	0.119903	0.1527	0.18003	0.122369	0.12886	0.207012	0.112688	0.124668	0.156933	0.151917	0.11991	0.0808095	0.140538	0.142901	0.0726732	0.291797	0.324656			0.0723412	0.19691	0.11251	0.112857
	60				0.192009	0.236439	0.222176	0.152563	0.115294	0.135436	0.155736	0.232512	0.150822	0.256312	0.112647	0.119892	0.0947856	0.134238	0.126346	0.108362	0.151903	0.0949178	0.128547	0.125554	0.100857	0.127777	0.137647	0.159844	0.116175	0.134263	0.165745	0.101692	0.128016	0.172477	0.144295	0.179433	0.192335	0.108268	0.124126	0.0776643	0.324931	0.265643			0.105059	0.127528	0.132662	0.0984071
	65				0.163217	0.178189	0.19494	0.117748	0.125379	0.161634	0.129974	0.245145	0.14909	0.205327	0.131157	0.251496	0.0995232	0.114885	0.140204	0.111526	0.112915	0.0923831	0.157485	0.114136	0.120511	0.131028	0.147961	0.152535	0.139041	0.264682	0.145039	0.115839	0.116885	0.162117	0.138313	0.183987	0.142581	0.129386	0.178281	0.0890909	0.270198	0.289122			0.083875	0.16171	0.120042	0.0961961
	70				0.210062	0.205665	0.142078	0.0992785	0.124284	0.121447	0.14952	0.240298	0.164553	0.255714	0.152649	0.150881	0.0996016	0.110526	0.112375	0.0935734	0.180062	0.159298	0.119216	0.122003	0.166677	0.133552	0.190051	0.173676	0.115777	0.170795	0.149561	0.123343	0.126753	0.132922	0.173445	0.143707	0.107735	0.120756	0.201092	0.103824	0.26948	0.295577			0.103981	0.186045	0.155217	0.13894
	75				0.17956	0.25296	0.0977423	0.125625	0.118876	0.10384	0.133416	0.207222	0.182216	0.304426	0.137419	0.215522	0.0893958	0.105534			0.154076	0.132279	0.125687	0.129151	0.0969886	0.134079	0.184908	0.153215	0.136443	0.215724	0.115836	0.120886	0.117294	0.147383	0.114174	0.106827	0.0843559	0.132066	0.172591	0.084836	0.261084	0.275842			0.110971	0.1507	0.134721	0.172554
	80				0.199603	0.217832	0.197473	0.21741	0.104075	0.116087	0.131871	0.251407	0.145511	0.270562	0.144512	0.197126	0.105063	0.115539			0.123932	0.100173	0.196893	0.122341	0.092252	0.110265	0.164658	0.218573	0.126673	0.211066	0.13767	0.112062	0.119996	0.151516	0.118372	0.196588	0.159718	0.106372	0.141249	0.0872734	0.294109	0.352273			0.107272	0.186594	0.138883	0.111082
	85				0.134067	0.136006	0.211068	0.193735	0.126874	0.133561	0.130013	0.233317	0.119592	0.217127	0.125929	0.24868	0.0894175	0.0832509			0.134103	0.121224	0.224605	0.138256	0.135468	0.125543	0.167795	0.210393	0.122173	0.144112	0.128484	0.118819	0.147242	0.153598	0.106395	0.204619			0.164712	0.105069	0.228741	0.243291			0.0747245	0.152297	0.119964	0.14173
	90				0.0927818	0.121879	0.100156	0.152876	0.140908	0.115615	0.099115	0.216538	0.146315	0.258531	0.127458	0.166209	0.104218	0.115874			0.124453	0.14756	0.0844272	0.132813	0.0829849	0.132223	0.156135	0.244363	0.127205	0.116843	0.126018	0.128019	0.150697	0.173187	0.11815	0.172718					0.353459	0.198867			0.113984	0.178562	0.133417
	95				0.164375	0.192601	0.102837	0.146652	0.139428	0.113541	0.137372	0.212847	0.139674	0.261023	0.110112	0.165473	0.0830413	0.097578					0.128494	0.111807	0.0776561	0.0995007	0.137435	0.18531	0.111665	0.161863	0.140406	0.129814	0.161679	0.121869	0.137488	0.156589									0.0947577	0.172831	0.144753
	100				0.16723	0.213021		0.161481	0.124794	0.116788	0.122399	0.205845	0.147795	0.209717	0.102446	0.159271	0.0930376	0.0765867							0.0943364	0.0824712	0.141995	0.243334	0.10958	0.156571	0.112003	0.124846	0.190432	0.178472	0.103664	0.155185									0.0780583	0.147928	0.146455
	105				0.152778	0.108653		0.13056	0.098459	0.132597	0.122685	0.185743	0.156492	0.21984	0.160183	0.21959	0.102623	0.0924187							0.124134	0.157465	0.165763	0.317249	0.120699	0.11501	0.12977	0.125128	0.147197	0.153025	0.121018	0.145615									0.0983473	0.168838	0.139391
	110				0.104557	0.107785		0.118046	0.110497	0.119413	0.113801	0.186917			0.106962	0.137761	0.100702	0.105796							0.0990778	0.0605633	0.162878	0.273179		0.131207	0.116508	0.122757	0.154274	0.208664	0.108705	0.151489									0.0902106	0.176685
	115								0.101296	0.104791					0.17044	0.227136	0.120585	0.106958									0.161846	0.379452			0.127289	0.153365	0.128914	0.176732	0.0975916	0.162062
	120								0.126072	0.0977849							0.170398	0.128004									0.169336	0.135536			0.139843	0.13234	0.179067	0.209134	0.128831	0.16323
	125								0.109902																		0.158219	0.119687			0.111236	0.115883	0.114522	0.181398	0.105192	0.152096
	130								0.123964																		0.143081	0.109491			0.116918	0.119405	0.114878	0.211153	0.121124	0.173929
	135																										0.177716	0.142301			0.128908	0.122823	0.152977		0.140371	0.209433
	140																										0.157381	0.173606			0.117253	0.153139			0.110226	0.150764
	145																										0.224016	0.277894			0.12614	0.147272			0.128633	0.181366
	150																														0.109686	0.125146			0.116264	0.182216
	155																														0.116714	0.145182			0.12122	0.164045
	160																																		0.128344	0.166462
	165																																		0.106886	0.14372
	170																																		0.0961077	0.133266
	175																																		0.124408	0.162682
[truncated: 24 more columns]
