# Supplementary material for: Visualizing the metazoan proliferation-quiescence decision in vivo
Source: eLife. 2020 Dec 22;9:e63265. doi: 10.7554/eLife.63265 (PMC7880687; doi:10.7554/eLife.63265)
Supplement: Figure 6—source data 1. — Raw data of DHB ratios used to generate Figure 6F in Microsoft Excel format. [file elife-63265-fig6-data1.xlsx]

## Sheet: Figure 6 
Figure 6	F
	DHB-mSC			DHB-mNG			DHB-mSC
	Peak G2	G1		Peak G2	G1		S phase
	8.2861	0.602966		3.93787	0.563743		1.39662
	6.79088	0.595246		2.90095	0.552054		1.79617
	8.44387	0.446698		4.45562	0.554014		1.19472
	7.90898	0.189917		3.19485	1.03883		0.958287
	5.46584	0.656522		3.28857	0.855884		1.04445
	10.5477	0.50312		3.94764	0.755395		1.75961
	8.75985	0.982886		2.72092	0.585926
	6.29155	0.893707		2.93683	0.619749
	4.76916	1.02136		3.19222	0.628676
	5.56231	0.817656		3.64183	0.396518
	5.64866	0.767455			0.578978
	4.39827	0.616447			0.768836
	6.55484	0.949061			0.52055
	8.98599	0.677795			0.851256
	5.08101	0.69591			0.816964
	5.6185	0.625598			0.903143
	9.51445	0.733437
	5.89244	0.845623
	6.71278	0.9233
	3.99739	0.669088
	2.67925	0.389773
		0.228676
		0.300015
		0.334704
		0.595232
		0.372264
		0.250939
		0.403154
		0.578836
		0.384883
		0.288613
		0.407494
		0.54878
		0.309146
		0.353832
		0.79736
		0.668909
		0.44827
		0.573164
		0.366436
		0.21647
		0.350374
		0.447165
		0.538809
		0.296527
		0.454894
		0.618319
		0.574899
		0.445718
		0.643819
		0.548075
		0.476511
		0.247021
		0.274774
		0.378985
		0.299365
		0.406545
		0.2749
		0.332838
		0.256042
		0.400808
