# Supplementary material for: Visualizing the metazoan proliferation-quiescence decision in vivo
Source: eLife. 2020 Dec 22;9:e63265. doi: 10.7554/eLife.63265 (PMC7880687; doi:10.7554/eLife.63265)
Supplement: Figure 6—source data 2. — Raw data of DHB ratios used to generate Figure 6—figure supplement 1A in Microsoft Excel format. [file elife-63265-fig6-data2.xlsx]

## Sheet: Fig 6 Supp 1
Figue 6 - Figure supplement 1A
	Time	DHB-mSC
	-75.5																										5.76622						8.01965	5.91562			3.93425											4.07873
	-75
	-74.5
	-74
	-73.5
	-73
	-72.5
	-72																										5.02858						8.75985	5.79719			3.20591											3.65377
	-71.5
	-71
	-70.5
	-70
	-69.5
	-69
	-68.5																			4.57632					4.8798		4.60818						5.8263	5.50503			3.1591					2.3011						3.88349
	-68
	-67.5
	-67
	-65.5
	-65
	-64.5
	-64																			6.13053					5.52667		4.48559						5.87318	6.1482			3.67102					2.48728						4.68124
	-63.5
	-63
	-62.5
	-62
	-61.5
	-61
	-60.5																			5.6932					5.68099		4.28501						6.87089	4.63308			2.62778					3.30677						4.10341
	-60
	-59.5
	-59
	-58.5
	-58
	-57.5
	-57																	5.30617		6.88408					5.18164		4.7301						5.38712	5.17907			3.01052		5.56231			3.10056						4.76833
	-56.5
	-56
	-55.5
	-55
	-54.5
	-54
	-53.5																	4.85706		6.215					5.86181		5.27128						7.65671	5.38554			4.19168		5.2957	2.64675		2.13668						3.34583
	-53
	-52.5
	-52
	-51.5
	-51
	-50.5
	-50	2.5399																4.44127		6.81539					6.38833	4.27453	5.15877						4.31736	6.29155			3.88778		4.73642	3.78297		4.39827				7.16429		3.71383
	-49.5
	-49
	-48.5
	-48
	-47.5
	-47
	-46.5																	7.03311		6.51318					4.54623	7.90898	4.98133				5.22258		5.48775	5.8629			3.31552		4.79553	3.20018		3.64559				5.74403		4.81793
	-46
	-45.5
	-45	3.38269
	-44.5
	-44
	-43.5
	-43																	7.46811		6.79088					5.46892	5.24561	5.46584				6.49121		4.13279	5.42957			2.77377		4.56229	5.64866		3.25373				8.98599		3.19135
	-42.5
	-42
	-41.5
	-41
	-40.5
	-40	3.35172
	-39.5																	8.2861		5.8771					5.16124	2.11193	5.19014				10.4351		3.08184	5.84907			4.76916		5.1533	4.94284		2.82518		5.22049		6.9595		4.33079
	-39
	-38.5
	-38
	-37.5
	-37
	-36.5
	-36																	6.8068		4.44129					4.31868	3.61901	4.9577				10.5477		3.52545	4.3978			4.05539		3.70735	4.00015		1.80845		6.55484		5.45256		5.08101
	-35.5
	-35	1.13416		3.22835
	-34.5
	-34
	-33.5
	-33
	-32.5																	4.98769		6.53165					8.44387	2.58897	4.53572				9.21661		4.06906	5.12468			2.42757		3.93449	4.91052		2.20282		4.07891		8.50229		4.63194
	-32
	-31.5
	-31
	-30.5
	-30	4.27306		0.552811		2.24501		3.10783
	-29.5
	-29																	8.31667		5.8358					6.52924	0.673593	4.51339				7.81125		3.92418	6.44522			2.14776		2.47694	5.03711		3.01412		5.24355		6.9291		4.68012
	-28.5
	-28
	-27.5
	-27
	-26.5
	-26
	-25.5																	5.8538		0.762694					3.43487	0.717284	3.78163				0.687579		4.29004	6.14873			2.47038		0.511248	3.60879		1.52632		3.70947		7.13641		4.66101
	-25	1.23267		0.537218		0.811577		1.14594
	-24.5
	-24
	-23.5
	-23
	-22.5
	-22																	0.657533		0.664799					0.716209	0.721112	0.417555				0.853167		0.80649	0.812926			0.780515		0.750867	1.87484		0.741373		0.963428		1.31509		2.68266
	-21.5
	-21
	-20.5
	-20	1.10596		0.518455		0.89166		0.904736		1.07498
	-19.5
	-19
	-18.5																	0.576183		0.927785					0.838243	0.801327	0.476748				0.52211		0.594441	0.905031			0.607259		0.918106	1.08095		0.577749		0.834495		0.618268		1.48741
	-18
	-17.5
	-17
	-16.5
	-16
	-15.5
	-15	0.808221		0.552839		0.988807		0.914655		1.17143		0.87776						0.527732		0.733518					0.714688	0.564552	0.419312				0.758193		0.866306	0.946421	0.878491		0.733277		0.978552	0.839759		0.794309		0.815003		0.856298		1.29565
	-14.5
	-14
	-13.5
	-13
	-12
	-11.5
	-11																	0.71861		0.667314					0.809474	0.716818	0.393184				0.798941		0.911482	0.684525	1.02607		0.881201		0.956768	0.787676		0.767325		0.819518		0.905926		0.959723
	-10.5
	-10	1.29931		0.609924		0.896022		0.826425		1.05476		0.786345		0.853085
	-9.5
	-9
	-8.5
	-8
	-7.5																	0.791717		0.659202		0.601639			0.741369	0.627994	0.560442				0.400183		0.754368	0.958727	0.977325		0.6912		0.89955	1.09803	0.809691	0.858018		0.797242		0.885789		0.633074
	-7
	-6.5
	-6
	-5.5
	-5	1.4332		0.658825		0.871701		1.19727		1.26897		0.900147		1.52034
	-4.5
	-4																	0.662385		0.715643		0.593849		0.575496	0.722035	1.15684	0.437835				0.768038	0.640151	0.771825	0.670416	1.01008		0.783889		0.869557	1.00407	0.713178	0.71827		0.823845		1.02076		0.705271
	-3.5
	-3
	-2.5
	-1.5
	-1
	-0.5
	0	1.08135	0.915059	0.937201	0.976921	1.03705	1.36927	1.11204	1.038	0.798245	0.9125	1.29681	1.04215	0.878525	1.35774	0.99509	1.25998	0.922995	0.724031	0.934598	0.729415	0.717292	0.929247	0.689758	0.802995	0.774019	0.915502	0.933394	0.755307	0.987142	1.07233	0.687591	0.792455	0.911975	1.08506	0.821487	0.840538	0.869331	0.962209	0.995206	1.00406	1.44163	1.00769	1.11166	0.84714	0.934164	0.699933	0.869868	0.649497
	0.5
	1
	1.5
	2
	2.5
	3
	3.5																	0.929945	0.67055	0.670412	0.994431	0.95862	0.456733	1.28055	0.662025	0.135533	0.561089	0.833548	0.62479	0.624086	0.835693	0.926544		0.969401	1.09092	0.756847	0.948271	1.00597			0.77664	1.03351	1.03467	1.00503	0.92114	0.962608	0.93041	1.13949	0.916934
	4
	4.5
	5	0.935389	0.851576	1.00002	0.831904	0.98554	1.0826	1.04083	1.318	1.06364	1.08287	1.06057	0.86496	0.909357	1.13011	0.820611	0.992688
	5.5
	6
	6.5
	7																	0.989694	0.955256	0.629774	0.816576	0.595878	0.836019	0.765728	0.984486	0.086894	0.653038	0.609925	0.758335	1.17011	0.881179	0.729679		0.713015	0.881612	1.33358	0.73712	0.844772			0.996142	0.847541	0.934738	1.01889	0.743104	0.956651	0.724349	0.850389	0.660396
	7.5
	8
	8.5
	9
	9.5
	10	0.820583	0.797753	0.99074	0.758244	0.798711	1.18113	0.925869	1.12668	1.04428	1.06187	0.934434	0.785828	0.844158	1.07921	1.07774	1.00796
	10.5																	0.76503	0.807865	0.843103	0.700684	0.426574	0.515234	0.797484	0.679797	0.0620189	0.57729	0.743306	0.784053	0.73134	0.766092	0.570697		0.695066	0.892595	1.02447	0.870585	1.18072			0.873879	0.703113	1.03248	1.09259	0.816717	0.902127	0.622737	0.336759	0.566522
	11
	11.5
	12
	12.5
	13
	13.5
	14																	0.868123	0.811603	0.810368	0.887455	0.819851	0.512342	0.740931	0.72894	0.0665466	0.582218	0.650925		0.404957	1.02121	0.381206		0.798152	0.912516	0.886541	0.936963	1.48881			0.61207	0.823814	0.749365	0.903464	1.09477	0.763114	0.664835	0.330202	0.381061
	14.5
	15	0.831712	0.661842	1.13075	1.12784	0.925738	1.15788	0.87446	0.853623	1.01382	1.03562	1.15503	0.823116	0.961404	1.15739	1.2909	0.944496
	15.5
	16
	16.5
	17
	17.5																	0.935983	0.884061	0.659619	0.784163	0.421704	0.293698	0.500391	0.443132	0.0613761	0.507847	0.561744		0.322547		0.52879		0.777404	0.875912	0.473473	0.897397	0.883235			0.677837	0.754519	0.942697	0.802271	0.861429	0.546799	0.713932	0.460636	0.4077
	18
	18.5
	19
	19.5
	20	0.646726	0.583641	0.943445	0.42319	0.672515	0.982842	0.809203	1.05037	1.00514	0.999605	1.04135	0.810404	0.967209	0.859324	1.09549	0.791715
	20.5
	21																	0.771309	0.872206	0.734565	0.944655	0.462667	0.471295	0.476582	0.420428	0.0944149	0.429444	0.381094		0.254472		0.527342		0.737218	0.804424	0.637856	1.02903	0.473514			0.492492	0.543532	0.669752	0.813718	0.862486	0.609479	0.602842	0.473665	0.306419
	21.5
	22
	22.5
	23
	23.5
	24
	24.5																	0.678329	1.03234	0.636363	0.913877	0.457672	0.311439	0.484027	0.529522	0.0662046	0.502171	0.392572		0.341066		0.439848		0.717973	0.599247	0.367785	1.1022	0.477511			0.462189	0.427247	0.507947	0.817179	0.760628	0.528278	0.588429	0.450252	0.375225
	25	0.652064	0.513664	0.47319	0.258626	0.705685	0.932728	0.789542	1.08633	0.916016	1.09439	0.959771	0.696872	1.0109	0.993476	0.647017	0.733606
	25.5
	26
	26.5
	27
	27.5
	28																	0.553169	0.906226	0.687198	1.1508	0.513404	0.36528	0.321895	0.315779		0.467571	0.391944		0.403982		0.352119		0.694389	0.643002	0.328017		0.410796			0.535848	0.406248	0.462227	0.694791	0.717212	0.475707	0.484568	0.297319	0.22652
	28.5
	29
	29.5
	30	0.602966	0.595246	0.446698	0.189917	0.656522	0.50312	0.982886	0.893707	1.02136	0.817656	0.767455	0.616447	0.949061	0.677795	0.69591	0.625598
	30.5
	31
	31.5																	0.733437	0.845623	0.9233	0.669088	0.389773	0.228676	0.300015	0.334704		0.595232	0.372264		0.250939		0.403154		0.578836	0.384883	0.288613		0.407494			0.54878	0.309146	0.353832	0.79736	0.668909	0.44827	0.573164	0.366436	0.21647
	32
	32.5
	33
	33.5
	34
	34.5
	35	0.494353	0.470064	0.311217	0.239872	0.498536	0.311526	0.755961	0.624749	0.848677	0.832817	0.575564	0.610795	1.08862	0.509337	0.660745	0.526016	0.724018	1.02031	0.442601	0.487225	0.380594	0.19892	0.254148	0.220913		0.400589	0.342198		0.22143		0.397358		0.47444	0.374471	0.22085		0.309875			0.537285	0.316665	0.281579	0.784112	0.67522	0.531937	0.392232	0.360715	0.238953
	35.5
	36
	36.5
	37
	37.5
	38
	38.5																	0.563066	1.03029	0.39822	0.412843	0.251626	0.266491	0.204897	0.21262		0.357089	0.337398		0.249447		0.268578			0.296572			0.348852			0.501396	0.281449	0.4162	0.73755	0.602568	0.338015	0.371294	0.351612	0.234454
	39
	39.5
	40	0.429304	0.481448	0.294219	0.21297	0.319235	0.262925	0.806892	0.840473	0.699151	0.6752	0.621089	0.440789	0.871708	0.627948	0.50738	0.446357
	40.5
	41
	41.5
	42																	0.49145	0.750397	0.471889	0.539716	0.25552	0.230335	0.187897	0.187971		0.367116	0.268686		0.204109		0.386964			0.284191						0.463583	0.248226	0.301909	0.803144	0.650698	0.428299	0.305732	0.291967	0.195445
	42.5
	43
	43.5
	44
	44.5
	45	0.410736	0.488847	0.27458	0.229756	0.382199	0.250798	0.562808	0.798406	0.659068	0.639088	0.569365	0.483713	0.800531	0.313543	0.523835	0.416454
	45.5																	0.50036	0.936232	0.131097	0.379719	0.276989	0.297923	0.328483	0.18432					0.157712		0.262655			0.400104						0.449118	0.23639	0.294875	0.78463	0.698173	0.332388	0.390786	0.238328	0.133529
	46
	46.5
	47
	47.5
	48
	48.5
	49																	0.684714		0.318486	0.375135	0.357535	0.276728	0.191191	0.130663					0.155177		0.484962			0.335551						0.396527	0.181003	0.287077	0.747536	0.635576	0.328216	0.400574
	49.5
	50	0.414589	0.438545	0.273318	0.230553	0.293729	0.17911	0.622034	0.610877	0.628397	0.680141	0.441997	0.422661	0.393433	0.313327	0.488983	0.407633
	50.5
	51
	51.5
	52
	52.5																	0.582284		0.179986	0.384158		0.267389	0.210952	0.129435					0.222493		0.444004			0.36028						0.560185	0.212337	0.257225	0.726151	0.678846	0.269336	0.287148
	53
	53.5
	54
	54.5
	55	0.466388	0.480644	0.254801	0.21123	0.371418	0.195773	0.571311	0.63555	0.525387	0.545103	0.400735	0.399986	0.594433	0.307463	0.482894	0.365505
	55.5
	56																	0.541186		0.198191	0.358176			0.16864	0.165104					0.200774		0.421982			0.329972						0.577466	0.332238	0.202855	0.655244	0.745663	0.292528	0.466495
	56.5
	57
	57.5
	58
	58.5
	59
	59.5																			0.249927	0.462188			0.206052	0.129508					0.313568		0.477424			0.364644						0.52445	0.22515	0.221133	0.732975	0.853302	0.331981	0.426346
	60	0.395846	0.477165	0.21171	0.285476	0.324742	0.129982	0.534314	0.463285	0.507498	0.467822	0.402142	0.417507	0.286226	0.323224	0.465163	0.368253
	60.5
	61
	61.5
	62
	62.5
	63																			0.261414	0.391629			0.200798	0.122369							0.543245			0.234646						0.655506	0.176394	0.23524	0.844636	0.70907	0.312807	0.520505
	63.5
	64
	64.5
	65	0.403028	0.467377	0.224435	0.233007	0.207193	0.285614	0.562641	0.528806	0.447571	0.476609	0.43042	0.373143	0.32282	0.36593	0.428623	0.376128
	65.5
	66
	66.5																			0.203122	0.626327			0.187162	0.18138							0.317966			0.186847						0.66642	0.173856	0.203218			0.427446	0.570978
	67
	67.5
	68
	68.5
	69
	69.5
	70	0.430362	0.470202	0.224353	0.21326	0.209945	0.184883	0.562896	0.481481	0.54584	0.374302	0.41202	0.412945	0.252512	0.394838	0.39991	0.337799			0.308843	0.421382				0.167063							0.568356			0.184457						0.725951	0.213621	0.23407			0.449851	0.69875
	70.5
	71
	71.5
	72
	72.5
	73
	73.5																			0.329678	0.382039				0.127985							0.601427			0.263516						0.76665	0.141292	0.182848			0.338721	0.809807
	74
	74.5
	75	0.337905	0.409068	0.318409	0.193114	0.229671	0.144838	0.616061	0.52525	0.430923	0.43277	0.327416	0.333471	0.28232	0.240066	0.380944	0.303576
	75.5
	76
	76.5
	77																			0.373745	0.535986				0.148954																0.656895	0.131181	0.23267			0.22665	0.851121
	77.5
	78
	78.5
	79
	79.5
	80	0.421167	0.348431	0.273367	0.195197	0.201511	0.127873	0.568533	0.48908	0.512508	0.406946	0.338964	0.290784	0.170711	0.269509	0.36689	0.330515
	80.5																			0.343571					0.155793																0.821798	0.184407	0.272204			0.554073	0.942982
	81
	81.5
	82
	82.5
	83
	83.5
	84																			0.348799					0.174551																0.656304	0.16205	0.195451			0.626979	0.854692
	84.5
	85	0.399726	0.337615	0.257163	0.243623	0.269862	0.145731	0.607364	0.44142	0.50442	0.507402	0.325798	0.276543	0.225205	0.235532	0.322933	0.308784
	85.5
	86
	86.5
	87
	87.5																								0.121126																0.860219	0.148944	0.194055			0.359157	1.05317
	88
	88.5
	89
	89.5
	90	0.354334	0.286648	0.224975	0.206119	0.213247	0.13789	0.500452	0.388568	0.402494	0.476007	0.346846	0.338042	0.269068	0.266357	0.336893	0.297057
	90.5
	91
	91.5																																									0.273941	0.227533			0.537376	0.89465
	92
	92.5
	93
	93.5
	94
	94.5
	95	0.315927	0.270021	0.284481	0.243533	0.230895	0.148737	0.526258	0.48044	0.527664	0.527827	0.255595	0.251554	0.263432	0.253218	0.327668	0.293889																									0.257968	0.227197			1.17745	1.03504
	95.5
	96
	96.5
	97
	97.5
	98																																									0.24961	0.236648			0.767059	0.889247
	98.5
	99
	99.5
	100	0.302371	0.276233	0.388234	0.269978	0.13736	0.156975	0.432424	0.47263	0.469213	0.533978	0.282627	0.226622	0.24575	0.308245	0.288111	0.309886
	100.5
	101
	101.5																																									0.231247	0.191467			2.20965	0.778701
	102
	102.5
	103
	103.5
	104
	104.5
	105	0.286636	0.33201	0.332051	0.282973	0.22143	0.190624	0.375146	0.393131	0.34211	0.561267	0.318461	0.286511	0.277352	0.307125	0.349768	0.279995																									0.197491	0.155638			1.05221
	105.5
	106
	106.5
	107
	107.5
	108
	108.5																																									0.188073	0.218116			1.25564
	109
	109.5
	110	0.363648	0.419391	0.217486	0.289801	0.168388	0.170224	0.396015	0.387919	0.433311	0.430912	0.273003	0.211176	0.195739	0.214958	0.358171	0.314568
	110.5
	111
	111.5
	112																																									0.172979	0.263814			1.21752
	112.5
	113
	113.5
	114
	114.5
	115	0.308824	0.288266	0.238154	0.255396	0.147978	0.147419	0.410936	0.380367	0.424782	0.436142	0.299146	0.279808	0.226344	0.292926	0.338136	0.255231
	115.5																																									0.231803	0.232383			1.15394
	116
	116.5
	117
	117.5
	118
	118.5
	119																																										0.212394			0.865388
	119.5
	120	0.310741	0.30363	0.221106	0.19905	0.20292	0.138	0.343401	0.415418	0.460268	0.511492	0.293076	0.293068	0.26949	0.352	0.356194	0.291971
	120.5
	121
	121.5
	122
	122.5
	123
	123.5
	124
	124.5
	125	0.305979	0.375196	0.24353	0.199909	0.185251	0.149907	0.320315	0.390701	0.437932	0.411614	0.218782	0.331736	0.367493	0.282088	0.301187	0.247821
	125.5
	126
	126.5
	127
	127.5
	128
	128.5
	129
	129.5
	130	0.255035	0.342557	0.24047	0.165206	0.176062	0.164014	0.469906	0.331121	0.421939	0.4434	0.349629	0.225634	0.310344	0.240426	0.352023	0.250439
	130.5
	131
	131.5
	132
	132.5
	133
	133.5
	134
	134.5
	135	0.304948	0.330027	0.178545	0.193156	0.216783	0.194055	0.465447	0.29014	0.390696	0.429371	0.413675	0.33305	0.267957	0.248647	0.319575	0.220786
	135.5
	136
	136.5
	137
	137.5
	138
	138.5
	139
	139.5
	140	0.258843	0.337407	0.156569	0.211719	0.188689	0.177507	0.492946	0.270312	0.386925	0.492525	0.304598	0.40827	0.279612	0.252838	0.360265	0.190655
	140.5
	141
	141.5
	142
	142.5
	143
	143.5
	144
	144.5
	145	0.311428	0.330467	0.189861	0.152341	0.22198	0.164214	0.459634	0.271069	0.402627	0.464173	0.216772	0.233704	0.251308	0.262539	0.291594	0.200407
	145.5
	146
	146.5
	147
	147.5
	148
	148.5
	149
	149.5
	150	0.279673	0.329383	0.218429	0.235717	0.189604	0.165328	0.41431	0.345431	0.414183	0.454472	0.231706	0.176405	0.212465	0.265937	0.289242	0.195528
	150.5
	151
	151.5
	152
	152.5
	153
	153.5
	154
	154.5
	155	0.289486	0.34532	0.226295	0.147485	0.204478	0.17743	0.492023	0.227679	0.401032	0.431579	0.29537	0.231973	0.226833	0.238039	0.338941	0.183724
	155.5
	156
	156.5
	157
	157.5
	158
	158.5
	159
	159.5
	160	0.283325	0.352002	0.220123	0.181845	0.207648	0.215246	0.465682	0.259623	0.396907	0.39532	0.196269	0.14526	0.180923	0.26866	0.379657	0.207538
	160.5
	161
	161.5
	162
	162.5
	163
	163.5
	164
	164.5
	165	0.299684	0.348861	0.233828	0.175311	0.238399	0.165367	0.491457	0.276446	0.408281	0.348526	0.302035	0.2887	0.209066	0.275571	0.395209	0.207207
	165.5
	166
	166.5
	167
	167.5
	168
	168.5
	169
	169.5
	170	0.308435	0.267728	0.25832	0.154667	0.250554	0.180927	0.44998	0.238934	0.450233	0.42836	0.248849	0.129228	0.224566	0.193819	0.335096	0.178323
	170.5
	171
	171.5
	172
	172.5
	173
	173.5
	174
	174.5
	175	0.385313	0.288973	0.217304	0.214995	0.216061	0.175287	0.411576	0.232789	0.45187	0.405394	0.206204	0.174366	0.213532	0.278695	0.288926	0.220345
	175.5
	176
	176.5
	177
	177.5
	178
	178.5
	179
	179.5
	180	0.418105	0.252195	0.202111	0.206992	0.258964	0.19781	0.439702	0.207316	0.544742	0.359421	0.252283	0.239337	0.204799	0.210947	0.299908	0.203723
	180.5
	181
	181.5
	182
	182.5
	183
	183.5
	184
	184.5
	185	0.338054	0.269296	0.147548	0.208029	0.234825	0.14977	0.347506	0.362573	0.527791	0.374982	0.21019	0.200967	0.268608	0.285054	0.244408	0.217298
	185.5
	186
	186.5
	187
	187.5
	188
	188.5
	189
	189.5
	190	0.309715	0.27932	0.199849	0.203247	0.223164	0.15603	0.486905	0.325935	0.485428	0.325395	0.222909	0.172453	0.249749	0.353068	0.259545	0.236604
	190.5
	191
	191.5
	192
	192.5
	193
	193.5
	194
	194.5
	195	0.335033	0.298945	0.208157	0.17804	0.18984	0.115452	0.387699	0.270694	0.407362	0.396272	0.236415	0.160076	0.226545	0.284142	0.288872	0.284639
	195.5
	196
	196.5
	197
	197.5
	198
	198.5
	199
	199.5
	200	0.345347	0.272045	0.200241	0.185885	0.20666	0.140494	0.593841	0.303209	0.469013	0.320259	0.346612	0.118385	0.190284	0.260857	0.266344	0.242344
	200.5
	201
	201.5
	202
	202.5
	203
	203.5
	204
	204.5
	205	0.488325	0.34675	0.18046	0.157991	0.209511	0.155709	0.570981	0.300829	0.49194	0.328539	0.201501	0.241772	0.257419	0.247205	0.247634	0.256577
	205.5
	206
	206.5
	207
	207.5
	208
	208.5
	209
	209.5
	210	0.402675	0.313001	0.241124	0.199867	0.20071	0.168205	0.661636	0.419668	0.462404	0.37055	0.185011	0.257096	0.20403	0.334306	0.288458	0.199669
	210.5
	211
	211.5
	212
	212.5
	213
	213.5
	214
	214.5
	215
	215.5	0.424515	0.35034	0.262992	0.250818			0.516576	0.470662	0.531584	0.392854	0.263612	0.170707	0.217316	0.195545	0.294544	0.21715
	216
	216.5
	217
	217.5
	218
	218.5
	219
	219.5
	220	0.34713	0.303294	0.227274	0.202434			0.551349	0.391615	0.427212	0.346976	0.220771	0.206952	0.227961	0.291125	0.243849	0.235
	220.5
	221
	221.5
	222
	222.5
	223
	223.5
	224
	224.5
	225	0.367115	0.314533	0.29066				0.554139	0.546317	0.42214	0.403929	0.230573	0.146109	0.214855	0.303908	0.288965	0.255439
	225.5
	226
	226.5
	227
	227.5
	228
	228.5
	229
	229.5
	230
	230.5	0.340018	0.276844					0.410708	0.371021	0.441706	0.382584	0.235572	0.192751	0.235257	0.355668	0.25474	0.270635
	231
	231.5
	232
	232.5
	233
	233.5
	234
	234.5
	235	0.320466	0.396356									0.271458	0.233186	0.20004	0.238613	0.297903	0.21406
	235.5
	236
	236.5
	237
	237.5
	238
	238.5
	239
	239.5
	240	0.289731	0.320835									0.268815	0.224014	0.223512	0.348771	0.273403	0.222531
	240.5
	241
	241.5
	242
	242.5
	243
	243.5
	244
	244.5
	245	0.419895	0.315399											0.211161	0.191106	0.288384	0.229223
	245.5
	246
	246.5
	247
	247.5
	248
	248.5
	249
	249.5
	250
	250.5
	251
	251.5
	252
	252.5
	253
	253.5
	254
	254.5
	255
	255.5
[truncated: 21 more columns]
