# Supplementary material for: Visualizing the metazoan proliferation-quiescence decision in vivo
Source: eLife. 2020 Dec 22;9:e63265. doi: 10.7554/eLife.63265 (PMC7880687; doi:10.7554/eLife.63265)
Supplement: Figure 7—source data 1. — Raw data of DHB ratios used to generate Figure 7B, D, E and K in Microsoft Excel format. [file elife-63265-fig7-data1.xlsx]

## Sheet: Figure 7 
Figure 7	B			D			E							K
	Tailbud			Tailbud			Palbo Tailbud							24hpf posterior somite	adaxial	muscle	90% NPCs	18s NPCs	24h NPCs	epidermis
	DHB-mNG	DHB-mSC		Palbo (n=6 fish)	Control (n=3 fish)		100	73.33	83.33	86.67	90	93.33		1.96941	0.1115	0.213783	0.176299	0.277206	0.313393	0.142569
	5.78495	5.30617		0.176976	2.88921									2.08162	0.0996	0.1203	0.193286	0.263637	0.383168	0.224137
	1.04724	4.85706		0.20079	2.77823		Control Tailbud							0.296666	0.1388	0.115369	0.254175	0.263386	0.406696	0.119774
	2.18008	4.44127		0.171799	3.24664		54.54	40	60					2.2129	0.1108	0.107944	0.253104	0.18806	0.282512	0.132139
	2.46123	7.03311		0.259555	0.622375									0.274212	0.1158	0.098496	0.278543	0.212532	0.29757	0.085074
	0.171786	7.46811		0.144198	0.254284									1.9832	0.1396	0.13606	0.291706	0.256218	0.314615	0.116775
	1.11828	8.2861		0.409482	2.75741									0.681219	0.1103	0.123704	0.219972	0.224571	0.371069	0.163953
	0.329449	6.8068		0.319745	0.247273									0.444309	0.109	0.096926	0.223967	0.277576	0.274308	0.138636
	2.03076	4.98769		0.168088	0.343231									0.406832	0.1028	0.152667	0.356389	0.253645	0.210797	0.10361
	0.632687	8.31667		0.285474	0.379385									0.473931	0.169	0.107289	0.198451	0.420309	0.297659	0.112479
	3.43254	5.8538		0.281148	0.217659									0.883571	0.1666	0.141596	0.315272	0.381156	0.415827	0.137229
	0.472338	0.657533		0.158007	0.241129									0.151395	0.0962	0.151609	0.323749	0.236085	0.207124	0.087448
	0.221795	0.576183		0.237472	0.121738									0.935049	0.1055	0.13809	0.224735	0.167397	0.35175	0.099063
	0.243608	0.527732		0.0236374	0.266637									1.66269	0.1466	0.276228	0.392425	0.26374	0.246546	0.122063
	2.5205	0.71861		0.0950673	0.472497									1.39984	0.1128	0.112209	0.461527	0.389734	0.183784	0.096796
	0.192626	0.791717		0.270548	0.217979									0.439751	0.0928	0.165488	0.231645	0.250955	0.369701	0.127412
	0.986162	0.662385		0.151303	0.138432									0.509476	0.1262	0.176013	0.231285	0.329301	0.320174	0.11073
	1.44731	0.922995		0.444588	3.21535									0.432212	0.1573	0.090853	0.356079	0.284279	0.254513	0.092122
	0.72499	0.929945		0.163403	1.69261									0.694883	0.0636	0.094587	0.332418	0.434353	0.316828	0.129103
	1.00056	0.989694		0.397917	2.51182									0.216587	0.1878	0.138797	0.230887	0.400185	0.411885	0.191892
	0.304828	0.76503		0.109575	3.02025									0.129676	0.0815	0.209479	0.244146	0.323215	0.308796	0.12913
	1.58684	0.868123		0.476642	2.11779									0.391245	0.1524	0.107372	0.321041	0.274641	0.284904	0.116693
	2.10024	0.935983		0.28023	1.97961									0.237741	0.1585	0.187914	0.445447	0.347415	0.266922	0.108529
	2.12944	0.771309		0.389353	2.14575									0.265968	0.1068	0.130789	0.266115	0.331641	0.268887	0.155269
	0.149914	0.678329		0.141397	3.32772									0.199236	0.1084	0.115586	0.199938	0.347424	0.291038	0.1511
	3.38332	0.553169		0.168403	4.14924									0.404924	0.1014	0.146037	0.33896	0.240818	0.261959	0.119696
	1.73499	0.733437		0.199869	0.171698									0.209803	0.0713	0.138107	0.431289	0.304466	0.242982	0.105113
	3.86828	0.724018		0.303539	0.293573									0.556539	0.1883	0.111538	0.275246	0.217126	0.368121	0.136597
	1.97351	0.563066		0.172207	0.208646									0.421798	0.1284	0.135449	0.31986	0.198844	0.29917	0.08489
	3.57165	0.49145		0.19761	0.453389									1.22615	0.1122	0.099286	0.226395	0.236237	0.305481	0.206159
	1.42905	0.50036		0.191423	0.25173									0.14966	0.0905	0.104553	0.22919	0.264951	0.409923	0.123218
	0.37615	0.684714		2.54202	0.346143									0.30556	0.1296	0.140988	0.214205	0.26159	0.218207	0.1139
	1.44699	0.582284		0.17514	0.11532									0.984162	0.1972	0.173632	0.309543	0.306633	0.233132
	3.51259	0.541186		0.240905	2.92159									1.23302	0.1435	0.103315	0.245434	0.338826	0.345321
	1.9913	0.724031		0.311517	2.26561									0.338468	0.0751	0.201543	0.197755	0.413879	0.469726
	0.246058	0.67055		0.184591	1.78644									2.70298	0.1215	0.110107	0.203392	0.333663	0.229326
	1.37151	0.955256		0.110443	2.2547									0.956182	0.1397	0.105738	0.193653	0.25079	0.495367
	4.48758	0.807865		4.1024	0.212224									1.77504	0.1162	0.107459	0.305308	0.399972	0.366315
	0.857241	0.811603		1.78083	0.520597									1.52471	0.0641	0.108693	0.326372	0.376118	0.386103
	3.66935	0.884061		0.123639	2.20619									1.03225	0.1154	0.146743	0.171584	0.334961	0.468251
	1.86569	0.872206		4.05711	2.67867									0.389654	0.1411	0.166302	0.300186	0.312895	0.489922
	1.51806	1.03234		4.43429	0.451072									0.247406	0.1169	0.156878	0.212426	0.382429	0.292903
	0.237734	0.906226		4.41161	0.50061									0.13146	0.1309	0.136154	0.248112	0.353157	0.180868
	0.170237	0.845623		0.130728	0.310814									0.573987	0.1585	0.106068	0.251778	0.346135	0.30074
	1.21754	1.02031		0.26437	0.306309									0.361667	0.1636	0.106778	0.265363	0.321352	0.274194
	1.21445	1.03029		0.0832009	1.93616									0.758693	0.1141	0.110957	0.161333	0.223818	0.390137
	2.87581	0.750397		3.86272	2.86862									0.165771	0.1369	0.083291	0.514847	0.416285	0.261141
	1.64187	0.936232		0.267069	0.402565									0.270846	0.2371	0.107073	0.267133	0.409731	0.237605
	0.16381	4.57632		0.131502	0.456305									0.213008	0.0799	0.092551	0.353191	0.513961
	3.4151	6.13053		0.302674	2.54904									0.478134	0.1021	0.087762	0.219653	0.429475
	1.05255	5.6932		0.192751	3.05628									0.260413		0.109493		0.347932
	3.04269	6.88408		0.184923	1.94539									1.34888		0.113745		0.406649
	1.03914	6.215		0.221575	1.81673									1.02932		0.124775		0.292796
	0.267039	6.81539		0.246664	1.67174									0.399179		0.132487		0.279446
	0.164888	6.51318		0.148827	0.290547									0.526343		0.093581		0.420468
	0.281279	6.79088		3.63432	0.260211									1.55497		0.151009		0.301367
	2.47101	5.8771		3.87534	0.527128									2.66804		0.11182		0.464198
	4.93047	4.44129		0.156821	1.45129									2.34182		0.110294		0.420415
	2.78898	6.53165		0.159973	2.8121									1.63563		0.1326		0.220288
	1.25447	5.8358		0.275927	2.39497											0.147562		0.286388
	0.334099	0.762694		0.128871	2.25185											0.204555		0.270188
	3.3019	0.664799		0.384092	0.413335											0.117485		0.315247
	4.4338	0.927785		0.37635	2.41981											0.093017		0.348438
	0.32038	0.733518		0.645721	1.28623											0.148767		0.418911
	2.90775	0.667314		0.349033	3.91541											0.12137		0.246984
	7.26152	0.659202		0.303078	0.304428											0.13934		0.323909
	0.471627	0.715643		0.406804	0.483881											0.161025		0.251174
	0.226154	0.934598		0.362202	0.320303											0.084831		0.41197
	3.27938	0.670412		0.33193	0.38835											0.101689		0.337284
	0.155499	0.629774		0.637359	0.13231											0.15855		0.153638
	0.272544	0.843103		2.04003	0.17325											0.138492		0.279715
	5.12203	0.810368		0.669841	0.442953											0.158489		0.352872
	0.362688	0.659619		0.308997	0.236093											0.11554		0.254206
	0.224436	0.734565		0.529071	0.413694											0.14574		0.242629
	0.180959	0.636363		0.39382	2.39745											0.092532		0.26599
	3.33286	0.687198		0.187469	2.24092											0.152034		0.241418
	7.66522	0.9233		0.379689	1.31324											0.11713		0.300076
	0.267705	0.442601		0.271634	1.78768											0.158974		0.310802
	0.310161	0.39822		0.412803	0.165248											0.176217		0.301351
	6.17594	0.471889		0.510899	0.432522											0.139658		0.289048
	0.145085	0.131097		0.453769	0.548072											0.102609		0.117154
	2.13468	0.318486		0.408914	0.489842											0.104954		0.149866
	0.443417	0.179986		0.403261	0.655744											0.160834		0.14225
	3.31369	0.198191		2.69953	0.144786											0.074155		0.158711
	3.58868	0.249927		2.28382	2.52285											0.119306		0.173519
	0.156737	0.261414		0.386025	2.85468											0.252355		0.351312
	0.744748	0.203122		0.17791	2.60309											0.181648		0.348153
	5.54364	0.308843		0.614144	1.94252											0.143232		0.325065
	0.165637	0.329678		0.300102	2.86181											0.205101		0.238671
	0.673874	0.373745		0.402424	0.268444											0.188248		0.2704
	1.82906	0.343571		0.376885	0.42777											0.185252		0.136088
	2.45566	0.348799		0.583386	0.173161											0.17328		0.194648
	4.1826	0.729415		0.452518	0.339699											0.087356		0.249369
	6.1978	0.994431		0.574887	2.74268											0.101079		0.240312
	6.14839	0.816576		0.368608												0.111073		0.279885
	0.20866	0.700684		0.696974												0.155238		0.325673
	0.391962	0.887455		0.432098												0.143582		0.2052
	3.7452	0.784163		0.493593												0.165709		0.1273
	3.0797	0.944655		2.09159												0.120945		0.2041
	2.81169	0.913877		0.538785												0.199415		0.1667
	2.55709	1.1508		0.51756												0.132464		0.2353
	5.31295	0.669088		0.279425														0.2277
	0.351711	0.487225		0.569428														0.1357
	0.420953	0.412843		0.298387														0.1127
	3.29486	0.539716		0.380439														0.1493
	1.87976	0.379719		0.324134														0.0735
	0.379951	0.375135		0.637508														0.0983
	3.44413	0.384158		0.405956														0.2079
	2.36497	0.358176		0.415782														0.1064
	3.63736	0.462188		0.191953														0.1569
	3.1342	0.391629		1.69087														0.2375
	0.306125	0.626327		0.410162														0.2309
	1.93242	0.421382		0.468373														0.222
	1.68809	0.382039		0.425691														0.2036
	0.491548	0.535986		0.280718														0.1436
	5.28838	0.601639		0.331282														0.2024
	3.16532	0.593849		0.263955														0.2218
	4.27348	0.717292		0.480614														0.1011
	5.05435	0.95862		0.258608														0.1973
	0.4823	0.595878		0.335194														0.1378
	0.159115	0.426574		0.299														0.1481
	2.21859	0.819851		0.260836														0.135
	2.59417	0.421704		0.20332														0.123
	2.23303	0.462667		0.574185														0.1837
	0.48964	0.457672		0.390439														0.2269
	0.350198	0.513404		0.164315														0.189
	0.395467	0.389773		0.330254														0.2822
	2.35344	0.380594		0.210019														0.2265
	0.798067	0.251626		0.187052														0.2053
	2.31947	0.25552		0.0948146														0.214
	0.252912	0.276989		0.440057														0.3058
	1.10891	0.357535		0.187743														0.247
	5.37049	0.929247		1.27054														0.2161
	0.347926	0.456733		0.0941871														0.2614
	0.197665	0.836019		3.67769														0.2072
	6.04505	0.515234		2.86982														0.1571
	0.273731	0.512342		0.355371														0.2657
	2.80964	0.293698		0.437224														0.2609
	2.58136	0.471295		0.170797														0.3078
	1.97521	0.311439		0.175975														0.2254
	0.254681	0.36528		0.222662														0.2654
	2.21639	0.228676		0.402662
	2.09007	0.19892		0.239963
	2.19199	0.266491		0.384387
	0.298732	0.230335		0.598346
	0.689625	0.297923		0.244577
	0.226495	0.276728		0.240919
	5.16517	0.267389		0.418913
	3.2611	0.575496		0.306433
	1.24368	0.689758		0.13148
	2.99232	1.28055		0.193359
	1.93477	0.765728		0.235007
	0.466793	0.797484		0.510645
	0.378022	0.740931		0.630428
	2.1242	0.500391		0.479273
	1.5917	0.476582		0.544107
	3.55738	0.484027		0.553117
	0.287511	0.321895		0.687872
	0.329514	0.300015		0.525428
	2.49746	0.254148		0.610297
	0.483745	0.204897		0.449578
		0.187897		0.206065
		0.328483		0.392435
		0.191191		0.188447
		0.210952		0.267902
		0.16864		0.29461
		0.206052		0.298212
		0.200798		0.417598
		0.187162		0.450963
		4.8798		0.307001
		5.52667		0.374975
		5.68099		0.307359
		5.18164		0.521527
		5.86181		0.394492
		6.38833		0.528409
		4.54623		0.282101
		5.46892		0.360843
		5.16124		0.324132
		4.31868		0.413747
		8.44387		0.243883
		6.52924		0.467715
		3.43487
		0.716209
		0.838243
		0.714688
		0.809474
		0.741369
		0.722035
		0.802995
		0.662025
		0.984486
		0.679797
		0.72894
		0.443132
		0.420428
		0.529522
		0.315779
		0.334704
		0.220913
		0.21262
		0.187971
		0.18432
		0.130663
		0.129435
		0.165104
		0.129508
		0.122369
		0.18138
		0.167063
		0.127985
		0.148954
		0.155793
		0.174551
		0.121126
		4.27453
		7.90898
		5.24561
		2.11193
		3.61901
		2.58897
		0.673593
		0.717284
		0.721112
		0.801327
		0.564552
		0.716818
		0.627994
		1.15684
		0.774019
		0.135533
		0.086894
		0.0620189
		0.0665466
		0.0613761
		0.0944149
		0.0662046
		5.76622
		5.02858
		4.60818
		4.48559
		4.28501
		4.7301
		5.27128
		5.15877
		4.98133
		5.46584
		5.19014
		4.9577
		4.53572
		4.51339
		3.78163
		0.417555
		0.476748
		0.419312
		0.393184
		0.560442
		0.437835
		0.915502
		0.561089
		0.653038
		0.57729
		0.582218
		0.507847
		0.429444
		0.502171
		0.467571
		0.595232
		0.400589
		0.357089
		0.367116
		0.933394
		0.833548
		0.609925
		0.743306
		0.650925
		0.561744
		0.381094
		0.392572
		0.391944
		0.372264
		0.342198
		0.337398
		0.268686
		0.755307
		0.62479
		0.758335
		0.784053
		0.987142
		0.624086
		1.17011
		0.73134
		0.404957
		0.322547
		0.254472
		0.341066
		0.403982
		0.250939
		0.22143
		0.249447
		0.204109
		0.157712
		0.155177
		0.222493
		0.200774
		0.313568
		5.22258
		6.49121
		10.4351
		10.5477
		9.21661
		7.81125
		0.687579
		0.853167
		0.52211
		0.758193
		0.798941
		0.400183
		0.768038
		1.07233
		0.835693
		0.881179
		0.766092
		1.02121
		0.640151
		0.687591
		0.926544
		0.729679
		0.570697
		0.381206
		0.52879
		0.527342
		0.439848
		0.352119
		0.403154
		0.397358
		0.268578
		0.386964
		0.262655
		0.484962
		0.444004
		0.421982
		0.477424
		0.543245
		0.317966
		0.568356
		0.601427
		8.01965
		8.75985
		5.8263
		5.87318
		6.87089
		5.38712
		7.65671
		4.31736
		5.48775
		4.13279
		3.08184
		3.52545
		4.06906
		3.92418
		4.29004
		0.80649
		0.594441
		0.866306
		0.911482
		0.754368
		0.771825
		0.792455
		4.92799
		4.90481
		5.42376
		4.91996
		5.22545
		4.88512
		5.45426
		5.91562
		5.79719
		5.50503
		6.1482
		4.63308
		5.17907
		5.38554
		6.29155
		5.8629
		5.42957
		5.84907
		4.3978
		5.12468
		6.44522
		6.14873
		0.812926
		0.905031
		0.946421
		0.684525
		0.958727
		0.670416
		0.911975
		0.969401
		0.713015
		0.695066
		0.798152
		0.777404
		0.737218
		0.717973
		0.694389
		0.578836
		0.47444
		0.878491
		1.02607
		0.977325
		1.01008
		1.08506
		1.09092
		0.881612
		0.892595
		0.912516
		0.875912
		0.804424
		0.599247
		0.643002
		0.384883
		0.374471
		0.296572
		0.284191
		0.400104
		0.335551
		0.36028
		0.329972
		0.364644
		0.234646
		0.186847
		0.184457
		0.263516
		0.821487
		0.756847
		1.33358
		1.02447
		0.886541
		0.473473
		0.637856
		0.367785
		0.328017
		0.288613
		0.22085
		3.88609
		3.83722
		4.38316
		4.86415
		5.41556
		5.22231
		5.7073
		3.93425
		3.20591
		3.1591
		3.67102
		2.62778
		3.01052
		4.19168
		3.88778
		3.31552
		2.77377
		4.76916
		4.05539
		2.42757
		2.14776
		2.47038
		0.780515
		0.607259
		0.733277
		0.881201
		0.6912
		0.783889
		0.840538
		0.948271
		0.73712
		0.870585
		0.936963
		0.897397
		1.02903
		1.1022
		0.869331
		1.00597
		0.844772
		1.18072
		1.48881
		0.883235
		0.473514
		0.477511
		0.410796
		0.407494
		0.309875
		0.348852
		5.59437
		4.75026
		4.44435
		3.8014
		3.52314
		3.87153
		3.88153
		3.52487
		3.30153
		2.9251
		4.25826
		5.11267
		4.26484
		2.43949
		2.50791
		5.54216
		3.69308
		2.94787
		3.49407
		4.33477
		2.72425
		3.12765
		2.97724
		2.72578
		3.03518
		2.64675
		3.78297
		3.20018
		5.64866
		4.94284
		4.00015
		4.91052
		5.03711
		3.60879
		1.87484
		1.08095
		0.839759
		0.787676
		1.09803
		1.00407
		0.995206
		5.56231
		5.2957
		4.73642
		4.79553
		4.56229
		5.1533
		3.70735
		3.93449
		2.47694
		0.511248
		0.750867
		0.918106
		0.978552
		0.956768
		0.89955
		0.869557
		0.962209
		0.809691
		0.713178
		1.00406
		0.77664
		0.996142
		0.873879
		0.61207
		0.677837
		0.492492
		0.462189
		0.535848
		0.54878
		0.537285
		0.501396
		0.463583
		0.449118
		0.396527
		0.560185
		0.577466
		0.52445
		0.655506
		0.66642
		0.725951
		0.76665
		0.656895
		0.821798
		0.656304
		2.3011
		2.48728
		3.30677
		3.10056
		2.13668
		4.39827
		3.64559
		3.25373
		2.82518
		1.80845
		2.20282
		3.01412
		1.52632
		0.741373
		0.577749
		0.794309
		0.767325
		0.858018
		0.71827
		1.44163
		1.03351
		0.847541
		0.703113
		0.823814
		0.754519
		0.543532
		0.427247
		0.406248
		0.309146
		0.316665
		0.281449
		0.248226
		0.23639
		0.181003
		0.212337
		0.332238
		0.22515
		0.176394
		0.173856
		0.213621
		0.141292
		0.131181
		0.184407
		0.16205
		0.148944
		0.273941
		0.257968
		0.24961
		0.231247
		0.197491
		0.188073
		0.172979
		0.231803
		1.00769
		1.03467
		0.934738
		1.03248
		0.749365
		0.942697
		0.669752
		0.507947
		0.462227
		0.353832
		0.281579
		0.4162
		0.301909
		0.294875
		0.287077
		0.257225
		0.202855
		0.221133
		0.23524
		0.203218
		0.23407
		0.182848
		0.23267
		0.272204
		0.195451
		0.194055
		0.227533
		0.227197
		0.236648
		0.191467
		0.155638
		0.218116
		0.263814
		0.232383
		0.212394
		5.22049
		6.55484
		4.07891
		5.24355
		3.70947
		0.963428
		0.834495
		0.815003
		0.819518
		0.797242
		0.823845
		1.11166
		1.00503
		1.01889
		1.09259
		0.903464
		0.802271
		0.813718
		0.817179
		0.694791
		0.79736
		0.784112
		0.73755
		0.803144
		0.78463
		0.747536
		0.726151
		0.655244
		0.732975
		0.844636
		0.84714
		0.92114
		0.743104
		0.816717
		1.09477
		0.861429
		0.862486
		0.760628
		0.717212
		0.668909
		0.67522
		0.602568
		0.650698
		0.698173
		0.635576
		0.678846
		0.745663
		0.853302
		0.70907
		7.16429
		5.74403
		8.98599
		6.9595
		5.45256
		8.50229
		6.9291
		7.13641
		1.31509
		0.618268
		0.856298
		0.905926
		0.885789
		1.02076
		0.934164
		0.962608
		0.956651
		0.902127
		0.763114
		0.546799
		0.609479
		0.528278
		0.475707
		0.44827
		0.531937
		0.338015
		0.428299
		0.332388
		0.328216
		0.269336
		0.292528
		0.331981
		0.312807
		0.427446
		0.449851
		0.338721
		0.22665
		0.554073
		0.626979
		0.359157
		0.537376
		1.17745
		0.767059
		2.20965
		1.05221
		1.25564
		1.21752
		1.15394
		0.865388
