# Supplementary material for: Visualizing the metazoan proliferation-quiescence decision in vivo
Source: eLife. 2020 Dec 22;9:e63265. doi: 10.7554/eLife.63265 (PMC7880687; doi:10.7554/eLife.63265)
Supplement: Figure 7—source data 2. — Raw data of DHB ratios used to generate Figure 7—figure supplement 1C, D, F, I and L in Microsoft Excel format. [file elife-63265-fig7-data2.xlsx]

## Sheet: Figure 7 Supp 1
Figure 7 - Figure supplement 1C, D, F, I and L
		C			D
		Posterior Forming Somite			Control Posterior Forming somites
		Palboo (n=2 fish)	Control (n=5 fish)		100	100	93.1	90	93.33
		0.124337	0.427611
		0.137528	0.398057		Palbo Somites
		0.103741	0.401634		76.67	63.33
		0.130063	0.628471
		0.202827	0.398589		F, I, L
		0.156836	0.124165		red blood	24h posterior somite	Muslce	24hpf notochord	Epidermis
		0.325684	0.0929826		3.62367	0.556416	0.164284	0.310562	0.0803364
		0.124194	0.504497		2.54855	1.79794	0.143025	0.485441	0.101067
		0.246826	0.360694		2.49369	0.648252	0.201407	0.232557	0.0816328
		0.0931145	0.25684		1.35557	1.7198	0.161621	0.347187	0.107556
		0.113544	0.222299		4.05342	0.920472	0.167591	0.399024	0.101199
		0.11339	0.630868		2.77781	2.90129	0.151266	0.368517	0.0990034
		0.130988	0.337978		3.51129	2.39556	0.184368	0.306428	0.0732924
		0.323711	0.173722		1.78765	0.499202	0.11052	0.390575	0.177244
		0.117057	0.469052		2.77368	0.389277	0.15394	0.310791	0.106228
		0.0202409	0.212411		3.49613	0.352513	0.0705125	0.337842	0.0904622
		0.115323	0.162591		2.39282	2.36111	0.0934889	0.26964	0.0815347
		0.102459	0.182927		2.34798	2.15026	0.13562	0.262628	0.18971
		0.114288	0.170486		2.07728	0.594365	0.106045	0.298937	0.118602
		0.210163	4.44535		3.09113	1.21228	0.125836	0.390196	0.103795
		0.152965	0.498876		3.12743	0.237343	0.10997	0.229381	0.0790672
		0.169935	0.347881		3.82345	0.378921	0.121379	0.392187	0.0575541
		0.224378	0.232615		3.16246	0.301958	0.136772	0.154277	0.0746379
		0.0786986	0.367513		4.39457	2.0205	0.122586	0.304658	0.11861
		0.209595	0.275099		2.92103	2.56306	0.109552	0.36589	0.0764296
		0.248269	5.49846		3.93551	0.477809	0.0910339	0.400237	0.110772
		0.116937	0.941186		6.3887	0.329566	0.0794387		0.0716062
		0.0803249	0.41025		2.42292	0.474618	0.15421		0.116948
		0.282822	2.12745		2.13593	0.62099	0.0876863		0.0618751
		0.130941	2.87636		2.77284	0.661326	0.108595		0.112923
		0.197714	0.240172		1.96806	0.822453	0.106017		0.126311
		0.249252	0.389547		4.9388	0.513651	0.135222		0.0707439
		0.179138	0.270763		2.14677	2.31229	0.0857231		0.0455243
		0.256154	0.54166		2.64155	2.30495	0.0954154		0.0897485
		0.2867	0.522475		3.04001	0.312453	0.103644		0.0877879
		0.282178	0.422682		2.94186	0.699442	0.143544		0.235587
		0.263742	0.313023		3.40311	0.373607	0.176099		0.0867723
		0.319532	0.163078		2.44573	0.365407	0.104929		0.0730963
		0.193851	0.120501		3.06161	0.368905	0.112165		0.102512
		0.177672	0.496532		2.44357	0.441479	0.143452		0.0707333
		0.259283	0.643787		1.5406	0.883142	0.133223		0.151561
		0.359559	0.673175		3.53385	3.45118	0.115507		0.14633
		0.290951	0.724654		2.29234	0.475038	0.109542		0.141286
		0.337124	0.641726		4.02379	0.240278	0.120467		0.0911965
		0.18363	0.120468			0.400578	0.16787		0.0618309
		0.415482	1.22959			1.21437	0.0856287		0.121179
		0.432601	0.934887			1.9983	0.13592		0.116402
		0.286966	0.303628			0.310045	0.154498		0.0451309
		0.301269	0.272593			0.3878	0.140544		0.0702579
		0.405395	0.0905855			1.93321	0.114326		0.0470674
		0.292566	0.249819			0.36974	0.164542		0.0835379
		0.425042	0.078853			0.451875	0.0994537		0.0785081
		0.317804	4.54407			1.61373	0.0877659		0.0397771
		0.284171	0.695752			0.371343	0.120572		0.0666814
		1.05125	0.235018			0.281701	0.176904		0.0556157
		0.439277	0.363025			0.41442	0.100568		0.0538776
		0.317413	0.348395			0.288735	0.143386		0.0561281
		0.295491	2.64769			0.622165	0.134988		0.0862355
		0.404469	3.30292			0.380203	0.0591711		0.0926876
		0.665836	4.08859			0.549037	0.0952366		0.105464
		0.446596				1.22433	0.0819382		0.0777359
		0.757488				0.6159	0.08036		0.0878294
		0.652069				0.521357	0.12575		0.300028
		0.426552				1.04035	0.0894001		0.043474
		0.389811				2.31094	0.114273		0.0663896
		0.318738				2.17991	0.106296		0.0610224
		0.456885				1.41353	0.0840161		0.0917835
		0.155144				2.79161	0.156108		0.0308627
		0.578262				0.428462	0.112245		0.166417
		0.247739				1.69506	0.0822218		0.0878293
		0.232084				0.515627	0.282058		0.0859282
		0.138592				0.317941	0.116205		0.080114
		0.4334				2.60569	0.0955119		0.0776519
		0.573419				0.184738	0.107759		0.0665338
		0.257692				0.388944	0.124011		0.123028
		0.360992				0.409947	0.149185		0.103881
		0.354516				0.422984	0.0927866		0.0942157
		0.486151				0.276344	0.107392		0.092389
		0.246719					0.117128		0.0817418
		0.187445					0.0847323
		0.161796					0.145878
		0.334876					0.118256
		0.644605					0.0926793
		0.450215					0.0864092
		0.192744					0.147403
		0.234448					0.127966
		0.261474					0.138169
		0.133386					0.111998
		0.0669619					0.174848
		0.586658					0.125382
		0.691548					0.183209
		0.619898					0.128672
		0.337422					0.277326
		0.225303					0.0765201
		0.306658					0.136347
		0.352517					0.13598
		0.178633					0.10908
		0.426696					0.0964801
		0.209482					0.0781828
		0.261823					0.0900521
		0.161728					0.139819
		0.144932					0.0934147
		0.170395					0.13646
		0.149675					0.14077
		0.268305					0.0967361
		0.145855					0.135406
		0.224019					0.267684
		0.237091					0.150716
		0.228984					0.0638002
		0.232873					0.118405
		0.164155					0.0540668
		0.321104					0.133876
		0.281575					0.134585
		0.308872					0.0736384
		0.219355					0.150238
		0.23409					0.132401
		0.490518					0.0869399
		0.364359					0.0789108
		0.525366					0.188458
		4.18938					0.190427
		0.259203					0.11872
		0.206631					0.12651
		0.307947					0.0959639
		0.254032					0.168403
		0.308148					0.165248
		0.240941					0.119174
		0.180917					0.188973
		0.337546
		0.673431
		0.13432
		0.508131
		0.327902
		0.179413
		0.177191
		0.145233
		0.273322
		0.218636
		0.276682
		0.316301
		0.304934
		2.75838
		0.164628
