# Supplementary material for: Visualizing the metazoan proliferation-quiescence decision in vivo
Source: eLife. 2020 Dec 22;9:e63265. doi: 10.7554/eLife.63265 (PMC7880687; doi:10.7554/eLife.63265)
Supplement: Supplementary file 1. — Associated p-values reported for all statistical analyses performed. See Figure 8—figure supplement 1 and Materials and methods for additional details of statistical analyses. [file elife-63265-supp1.xlsx]

## Sheet: Figure1
Figure 1G
		rps-27>DHB::GFP
		G1 VPC
rps-27>DHB::GFP	G2 VPC	0
		rps-27>DHB::2xmK2
		G1 VPC
rps-27>DHB::2xmK2	G2 VPC	0
Figure 1J		rps-27>DHB::2xmK2; PCN-1
		S VPC
rps-27>DHB::2xmK2; PCN-1	G1 VPC	5.8e-07

## Sheet: Figure 2
	Figure 2G	SM		Uterine
		HS rps-0>DHB::mK2	hs>CKI-1::BFP rps-0>DHB::mK2	HS hs>CKI-1::BFP rps-0>DHB::mK2	HS rps-0>DHB::mK2	hs>CKI-1::BFP rps-0>DHB::mK2
SM	HS hs>CKI-1::BFP rps-0>DHB::mK2	0	0	0.17478	-1	-1
	HS rps-0>DHB::mK2	1	0.83069	-1	0.052158	-1
	SM hs>CKI-1::BFP rps-0>DHB::mK2	-1	1	-1	-1	0.72112
Uterine	HS hs>CKI-1::BFP rps-0>DHB::mK2	-1	-1	1	0	0
	HS rps-0>DHB::mK2	-1	-1	-1	1	0.0003571

## Sheet: Figure 4
Figure 4G																				Figure 4I
			Undifferentiated						Differentited Normal					Differentiated Early								Uterine
			A	B	C	D	E	F	AA	BB	CC	EE	FF	A_Early	B_Early	C_Eearly	E_Early	F_Early				HEAT SHOCK hs>CKI-1::BFP rps0>DHB::mK2	hs>CKI-1::BFP rps0>DHB::mK2
	Undifferentiaed	A	1	4.335e-05	0.15865	0	8.6e-07	0	0	-1	-1	-1	-1	0.051356	-1	-1	-1	-1			HEAT SHOCK hs>CKI-1::BFP rps0>DHB::mK2	0	0
		B	-1	1	0.2829	0.0074874	0.395	0.21055	-1	0	-1	-1	-1	-1	0.22424	-1	-1	-1			HEAT SHOCK rps0>DHB::mK	1	0.0003571
		C	-1	-1	1	1.5e-06	0.17691	0.030917	-1	-1	0.04679	-1	-1	-1	-1	0.016535	-1	-1
		D	-1	-1	-1	1	0	0.21169	2.086e-05	0	0.67055	0	0	0.58458	0.51931	0	0.74999	0
		E	-1	-1	-1	-1	1	0.0065669	-1	-1	-1	0	-1	-1	-1	-1	0.35068	-1
		F	-1	-1	-1	-1	-1	1	-1	-1	-1	-1	6.49e-06	-1	-1	-1	-1	4.85e-06
	Normal	AA	-1	-1	-1	-1	-1	-1	1	0	0.74471	0.27882	0.00011868	0.78948	-1	-1	-1	-1
		BB	-1	-1	-1	-1	-1	-1	-1	1	0.11225	0	0.42985	-1	0.0001119	-1	-1	-1
		CC	-1	-1	-1	-1	-1	-1	-1	-1	1	0.52066	0.10854	-1	-1	0.05459	-1	-1
		EE	-1	-1	-1	-1	-1	-1	-1	-1	-1	1	0.00013444	-1	-1	-1	0.18372	-1
		FF	-1	-1	-1	-1	-1	-1	-1	-1	-1	-1	1	-1	-1	-1	-1	0.64381
	Early	A_Early												1	0.75981	0.048712	0.39992	0.22008
		B_Early												-1	1	4.115e-05	0.55907	0.00029244
		C_Eearly												-1	-1	1	0.13114	0
		E_Early												-1	-1	-1	1	0.059434
		F_Early												-1	-1	-1	-1	1

## Sheet: Figure 5
Figure 5D
G2 to Anaphase					Post Anaphase
	C	D	Dividing D			C	D	Dividing D
C	1	9.3e-07	0.63938		C	1	0.0014182	0.47565
D		1	0.00024115		D		1	0.0040731
Dividing D			1		Dividing D			1

## Sheet: Figure 6
Figure 6F
		DHB-mNG peak g2	DHB-mSC Peak G2	DHB-mNG G1	DHB- mSC G1	DHB- mSC S
	DHB-mNG peak G2	1	6.921e-05	2.1e-07	0	0.00011919
	DHB-mSC Peak G2		1	0	0	2.4e-06
	DHB-mNG G1			1	0.0034221	2.576e-05
	DHB-mSC G1				1	1e-08
	DHB-mSC S					1

## Sheet: Figure 7
Figure 7B
	DHB-mSC
DHB-mNG	0.10055
Figure 7D
	TBpalbo	TBcontrol
TBpalbo	1	6e-08
TBcontrol		1
Figure 7K
	24hpf posterior somite	24hpf adaxial	muscle	90% epiboly NPCs	18s NPCs	24hpf NPCs	epidermis	tailbud
24hpf posterior somite	1	0	0	3e-08	0	6e-07	5e-07	4.57e-06
24hpr adaxial		1	0.10618	0	0	0	0.73233	0
muscle			1	0	0	0	0.30338	0
90% notochord				1	0.44383	0.013565	0	1e-08
18s NPCs					1	0.00049905	0	0
24hpf NPCs						1	0	0
epidermis							1	1.8e-07
tailbud								1

## Sheet: Figure S1
Figure S1F
			rps-27>DHB::GFP						rps-27>DHB::2xmK2
			G2 VPC	G2 SM	G2 Uterine	G1 VPC	G1 SM	G1 Uterine	G2 VPC	G2 SM	G2 Uterine	G1 VPC	G1 SM	G1 Uterine
	rps-27>DHB::GFP	G2 VPC	1	0.88157	0.97971	0	-1	-1	0	-1	-1	0	-1	-1
		G2 SM	-1	1	0.88216	-1	0	-1	-1	7e-08	-1	-1	1.45e-06	-1
		G2 Uterine	-1	-1	1	-1	-1	0	-1	-1	5.4e-07	-1	-1	0.00014841
		G1 VPC	-1	-1	-1	1	0	0	0	-1	-1	1.25e-06	-1	-1
		G1 SM	-1	-1	-1	-1	1	0.0038035	-1	0	-1	-1	1.3e-07	-1
		G1 Uterine	-1	-1	-1	-1	-1	1	-1	-1	0	-1	-1	0
	rps-27>DHB::2xmK2	G2 VPC	-1	-1	-1	-1	-1	-1	1	0.0018602	0.023144	0	-1	-1
		G2 SM	-1	-1	-1	-1	-1	-1	-1	1	0.45212	-1	1.69e-06	-1
		G2 Uterine	-1	-1	-1	-1	-1	-1	-1	-1	1	-1	-1	0
		G1 VPC	-1	-1	-1	-1	-1	-1	-1	-1	-1	1	0.00037702	1e-08
		G1 SM	-1	-1	-1	-1	-1	-1	-1	-1	-1	-1	1	0.016824
		G1 Uterine	-1	-1	-1	-1	-1	-1	-1	-1	-1	-1	-1	1
Figure S1J
		rps-27>DHB::2xmK2
	rps-27>DHB::GFP	2e-08
Figure S1 M
			VPC		SM		Uterine
			S phase	G1	S phase	G1	G1	S Phase
	VPC	S phase	1	5.8e-07	0.16622	-1	-1	0.84248
		G1	-1	1	-1	1.63e-06	1e-08	-1
	SM	S phase	0.16627	-1	1	0.0050006	-1	0.098308
		G1	-1	1.63e-06	-1	1	0.00025956	-1
	Uterine	G1	-1	1e-08	-1	0.00026022	1	0.031686
		S Phase	0.84247	-1	0.098365	-1	-1	1

## Sheet: Figure S2 
Figure S2 A-C
		TWO	FOUR	EIGHT
	TWO	1	0.15768	0.00033002
	FOUR		1	4.95e-06
	EIGHT			1
Figure S2 D
		PRETERM	TERM
	PRETERM	1	0
	TERM		1
Figure S2 G-M
			D VS C		D VS AABBCCEEFF		D VS ABCEF		AB vs A+B		CD VS C VS D			C vs ABEF		EF vs E+F
			D	C	D	AABBCCEEFF	D	ABCEF	AB	A+B	CD	C	D	C	ABEF	EF	E+F
	D VS C	D	1	0.001168
		C		1
	D VS AABBCCEEFF	D			1	0.018679
		AABBCCEEFF				1
	D VS ABCEF	D					1	0
		ABCEF						1
	AB vs A+B	AB							1	0.10232
		A+B								1
	CD VS C VS D	CD									1	0.0032928	0.00019372
		C										1	0.0029868
		D											1
	C vs ABEF	C												1	0.30223
		ABEF													1
	EF vs E+F	EF														1	0.042044
		E+F															1

## Sheet: Figure S5
Figuer S5D
		PFSpalbo	PFScontrol
	PFSpalbo	1	3.024e-05
	PFScontrol		1
Figure S5G, J, M
		red blood	24hpf posterior somite	Muslce	24hpf NPCs	Epidermis	Tailbud
	red blood	1	0	0	0	0	0.00019117
	24h posterior somite		1	0	0.0010168	0	0.0055452
	Muslce			1	0	5.7e-07	0
	24hpf notochord				1	0	0.0047209
	Epidermis					1	0
	Tailbud						1
