# Supplementary figures and images for: Visualizing the metazoan proliferation-quiescence decision in vivo
Source: eLife journal article supplement (doi:10.7554/elife.63265), 2020-12-22

A

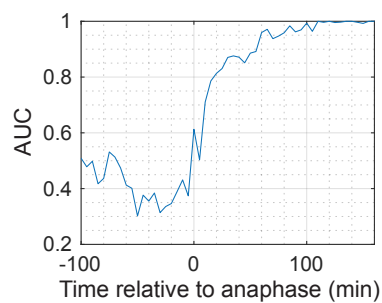

B

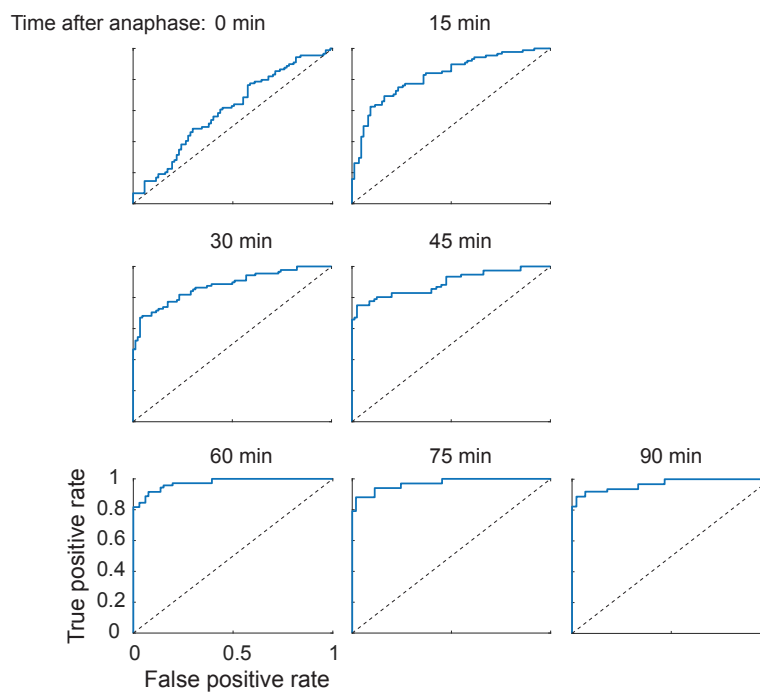

C

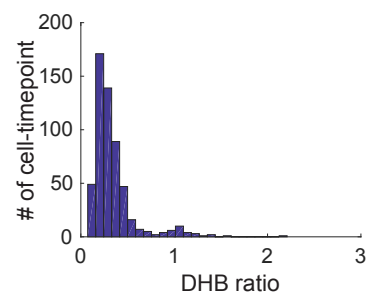

D

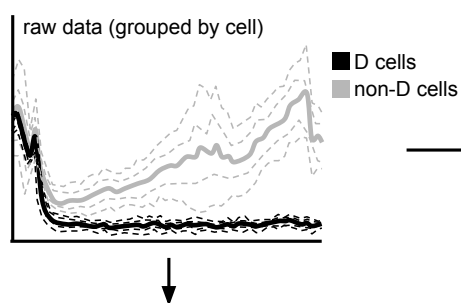

D'

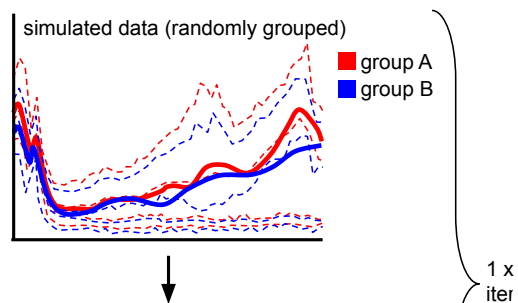

E

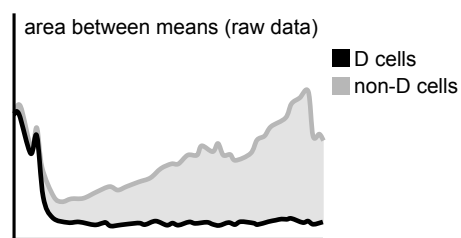

E'

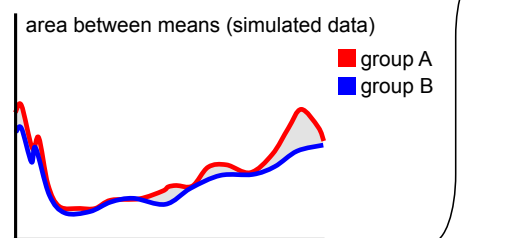

F

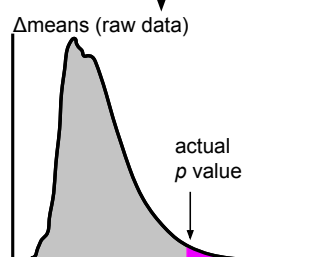

F'

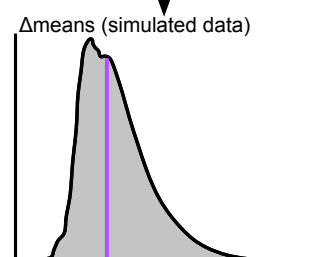

Supplement: supp [file elife-63265-supp-v1.zip]
